# Supplementary material for: Repeat-Driven Generation of Antigenic Diversity in a Major Human Pathogen, Trypanosoma cruzi
Source: PubMed Central journal article supplement (PMC7966520; doi:10.3389/fcimb.2021.614665), 2021-03-03

# Supplementary fig. 2.

TcX10\_chr1

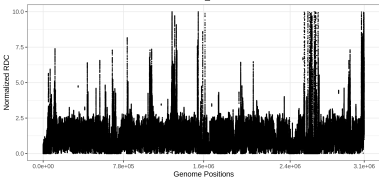

TcX10\_chr6

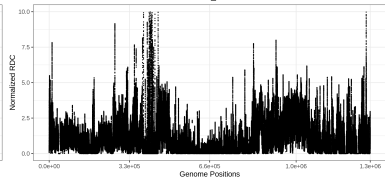

TcX10\_chr2

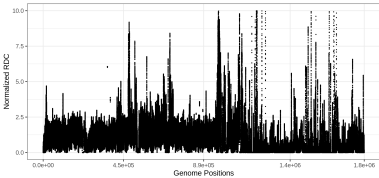

TcX10\_chr7

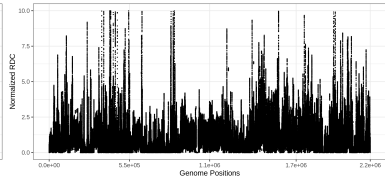

TcX10\_chr3

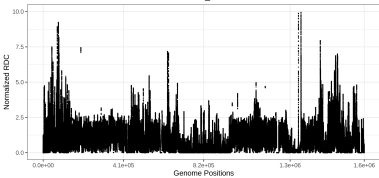

TcX10\_chr8

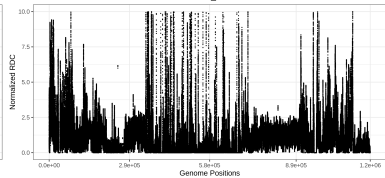

TcX10\_chr4

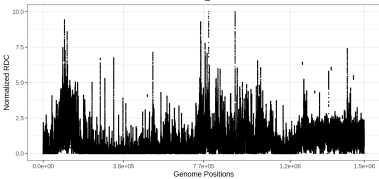

TcX10\_chr9

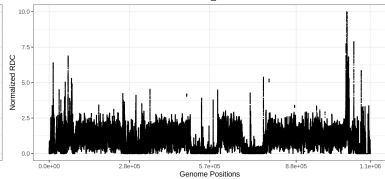

TcX10\_chr5

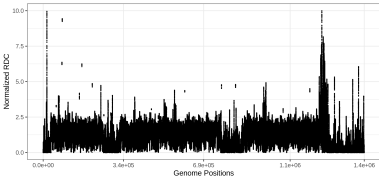

TcX10\_chr10

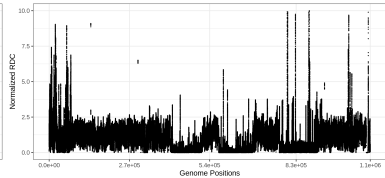

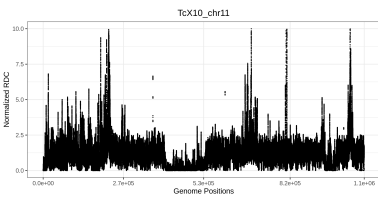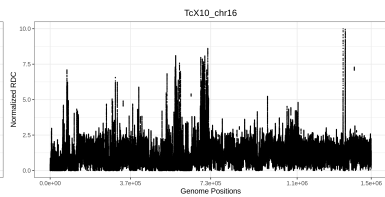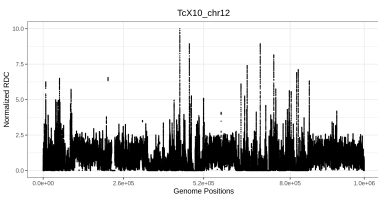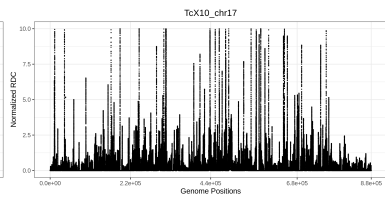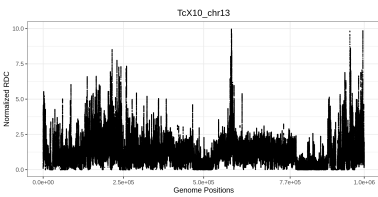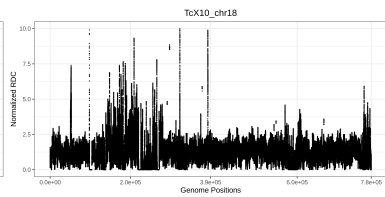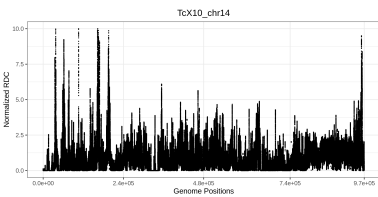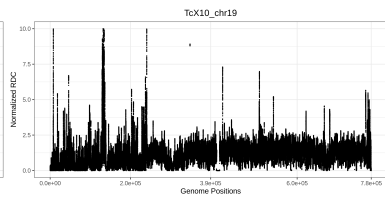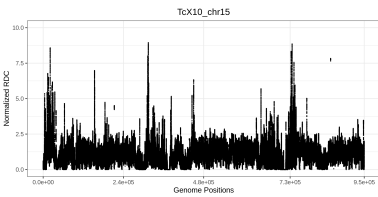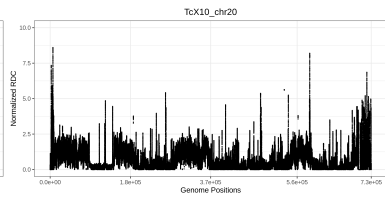

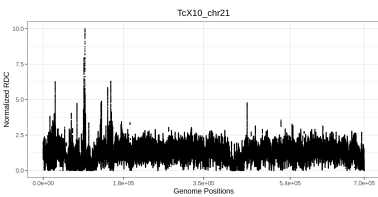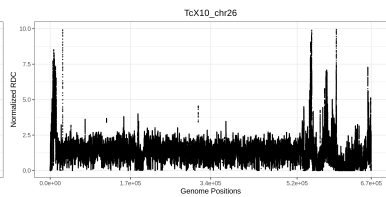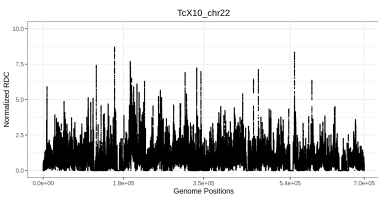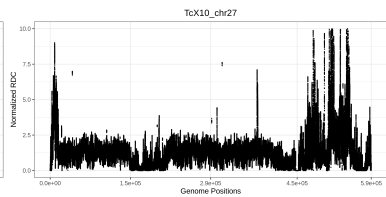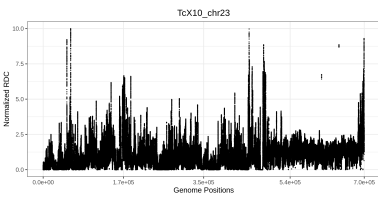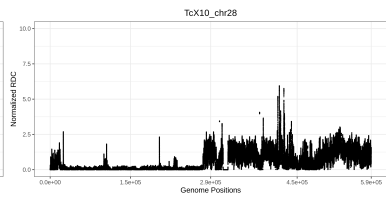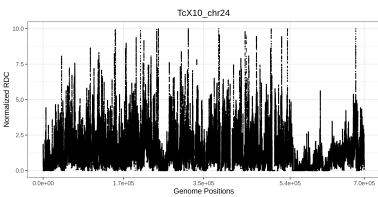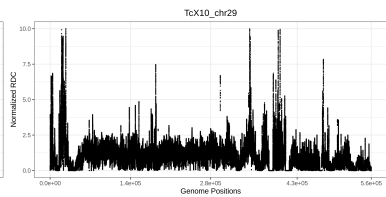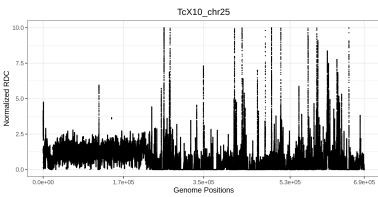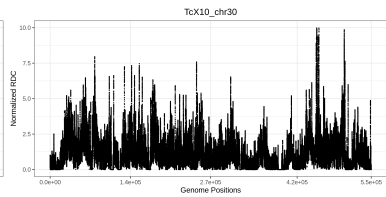

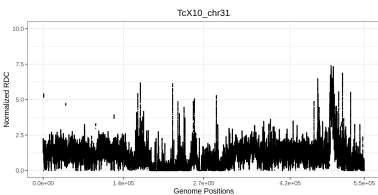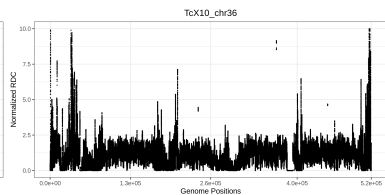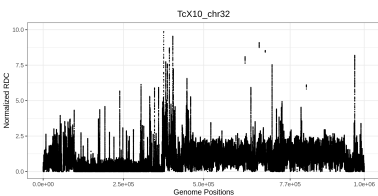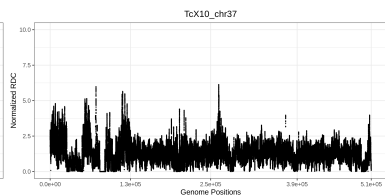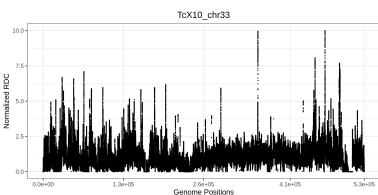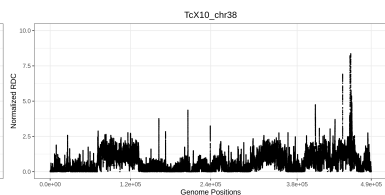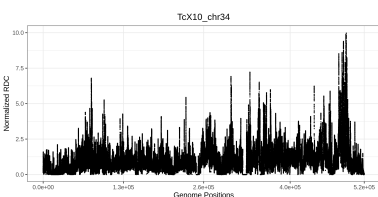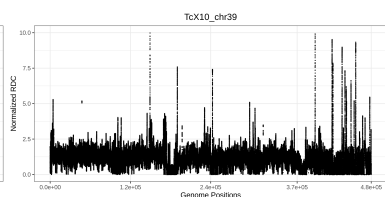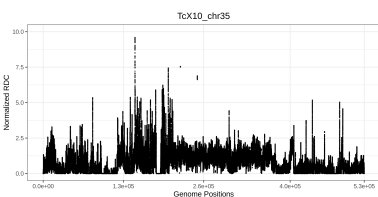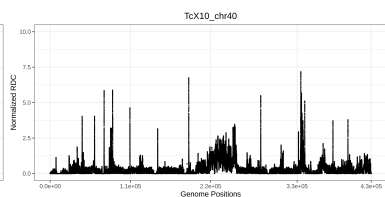

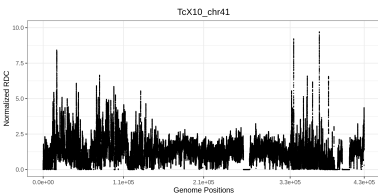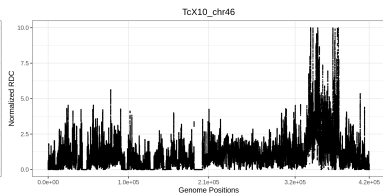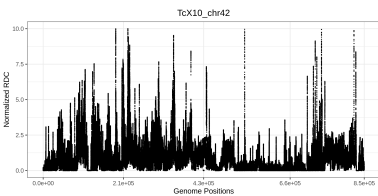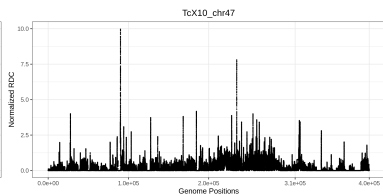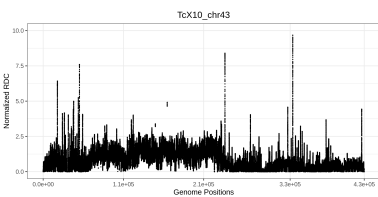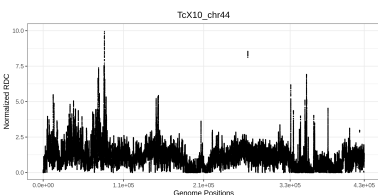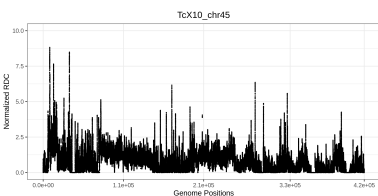

Supplement: DataSheet_7.pdf [file DataSheet_7.pdf]
