# Supplementary material for: Repeat-Driven Generation of Antigenic Diversity in a Major Human Pathogen, Trypanosoma cruzi
Source: PubMed Central journal article supplement (PMC7966520; doi:10.3389/fcimb.2021.614665), 2021-03-03

# Supplementary fig. 4. CGI11

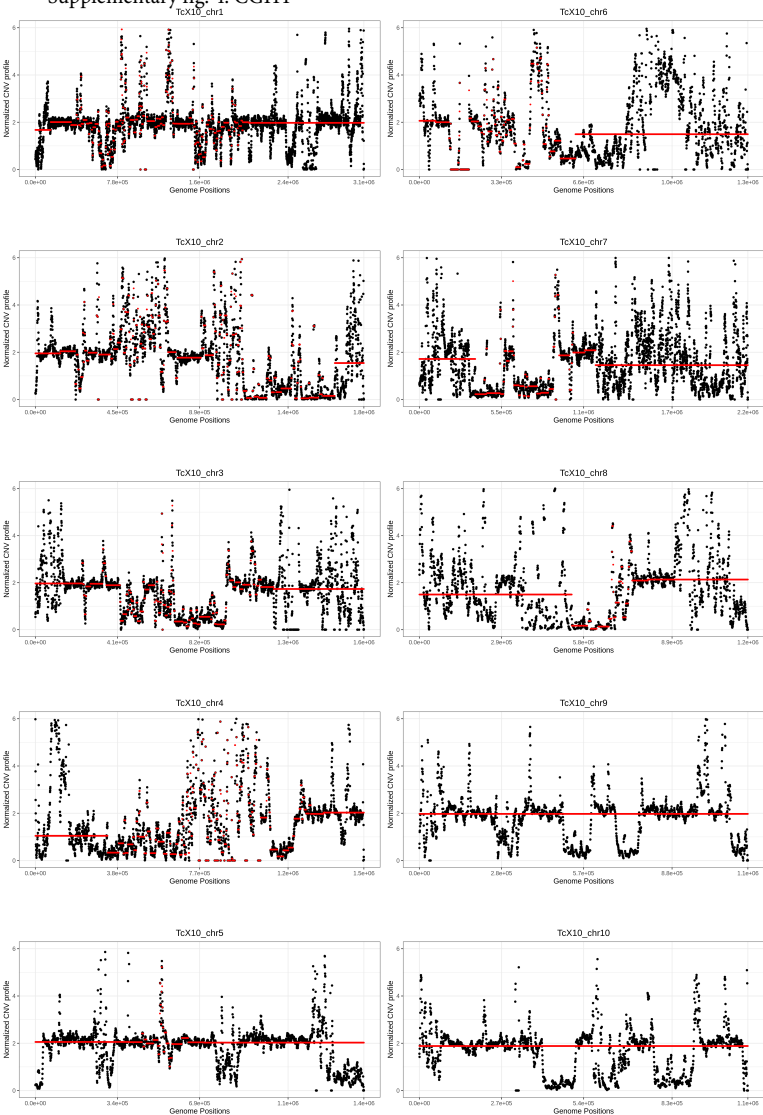

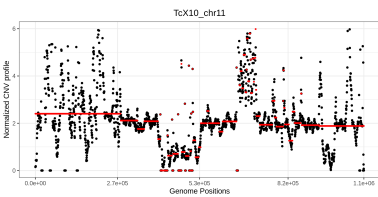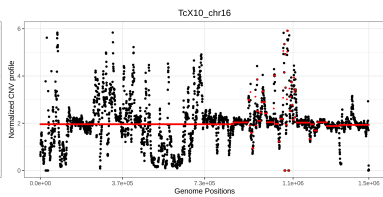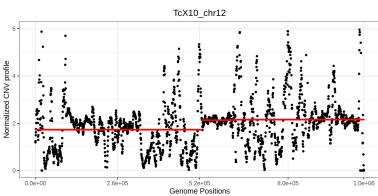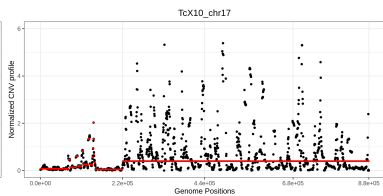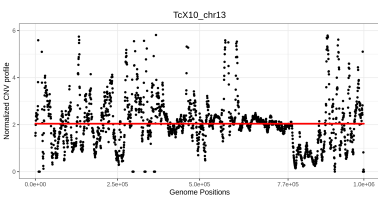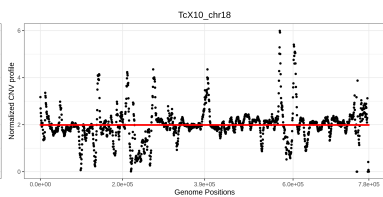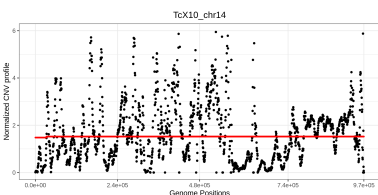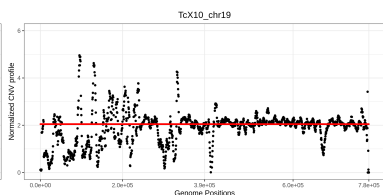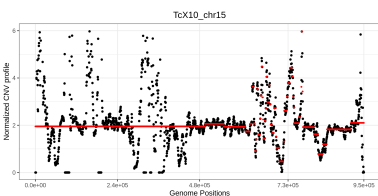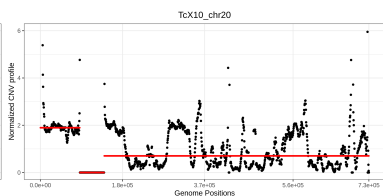

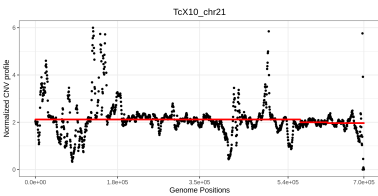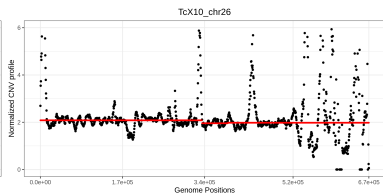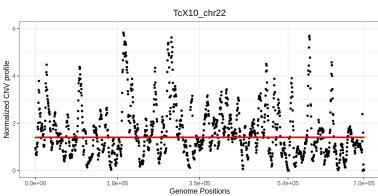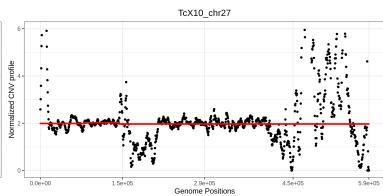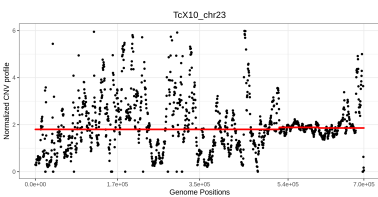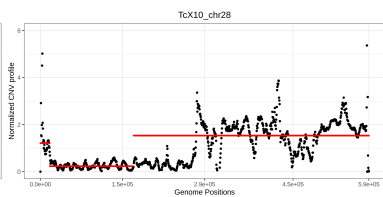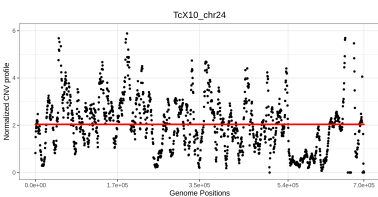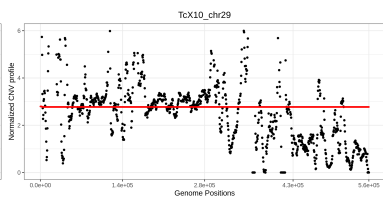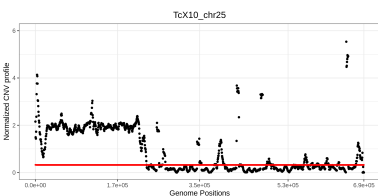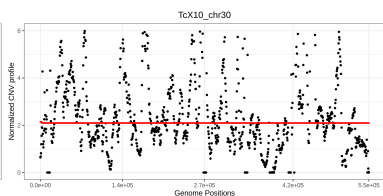

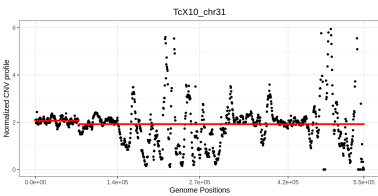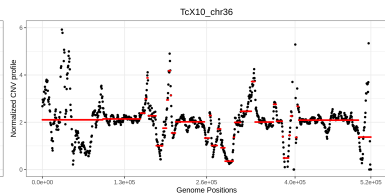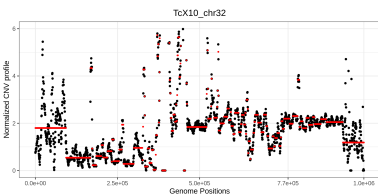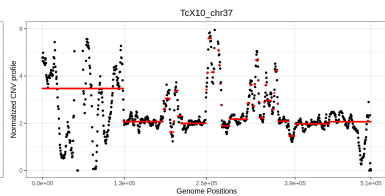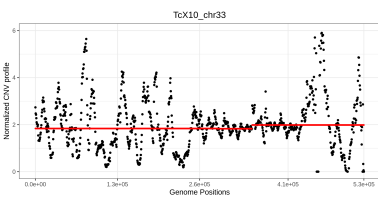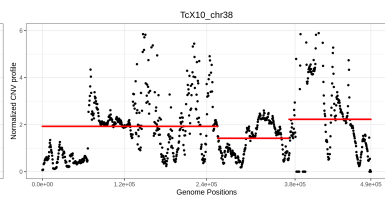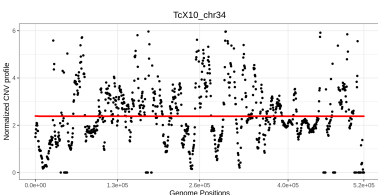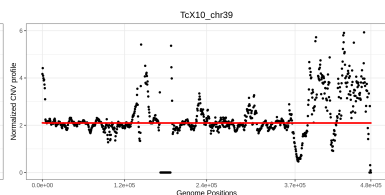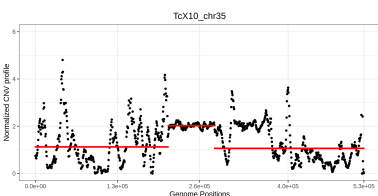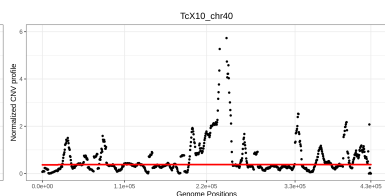

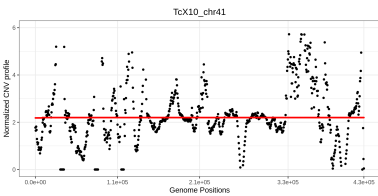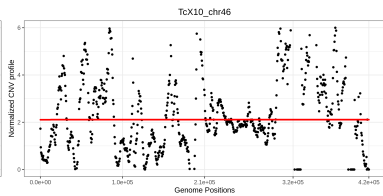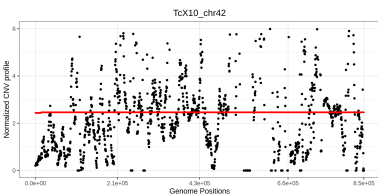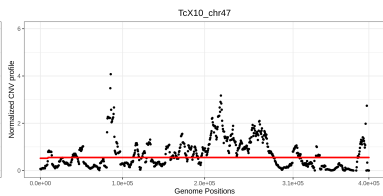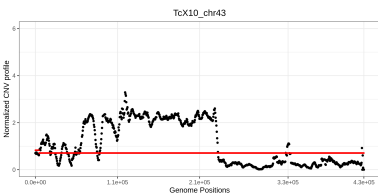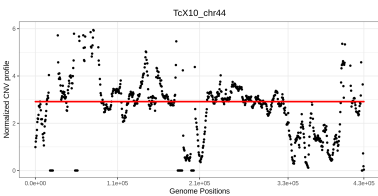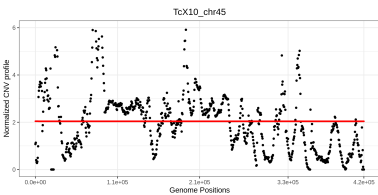

Supplement: DataSheet_9.pdf [file DataSheet_9.pdf]
