# Supplementary material for: Repeat-Driven Generation of Antigenic Diversity in a Major Human Pathogen, Trypanosoma cruzi
Source: PubMed Central journal article supplement (PMC7966520; doi:10.3389/fcimb.2021.614665), 2021-03-03
Supplement: DataSheet_1.pdf [file DataSheet_1.pdf]

**Supplementary Table 1: *Trypanosoma cruzi* strains used in this study.**

| <b>Strain</b> | <b>Country</b> | <b>Source</b>           | <b>Clinical form</b> | <b>Sequencing coverage*</b> |
|---------------|----------------|-------------------------|----------------------|-----------------------------|
| H1a           | Panama         | Human                   | Chronic              | 31 X                        |
| H2            | Panama         | Human                   | Asymptomatic         | 28 X                        |
| H3            | Panama         | Human                   | Asymptomatic         | 32 X                        |
| H4            | Panama         | Human                   | No Disease           | 29 X                        |
| H5            | Panama         | Human                   | Chronic              | 31 X                        |
| H6            | Panama         | Human                   | Asymptomatic         | 31 X                        |
| H7            | Panama         | Human                   | Asymptomatic         | 28 X                        |
| H8            | Panama         | Human                   | No Disease           | 32 X                        |
| H12           | Panama         | Human                   | No Disease           | 31 X                        |
| H14           | Panama         | Human                   | Chronic              | 32 X                        |
| H15           | Panama         | Human                   | Chronic              | 31 X                        |
| V1            | Panama         | <i>P. geniculatus</i>   | ND                   | 28 X                        |
| V2            | Panama         | <i>R. pallescens</i>    | ND                   | 25 X                        |
| V3            | Panama         | <i>T. dimidiata</i>     | ND                   | 28 X                        |
| TBM3324       | Ecuador        | <i>R. ecuadoriensis</i> | ND                   | 28 X                        |
| TBM3406B1     | Ecuador        | <i>R. ecuadoriensis</i> | ND                   | 25 X                        |
| TBM3479B1     | Ecuador        | <i>R. ecuadoriensis</i> | ND                   | 29 X                        |
| TBM3519W1     | Ecuador        | <i>R. ecuadoriensis</i> | ND                   | 28 X                        |
| X10462-P1C9   | Venezuela      | Human                   | ND                   | 31 X                        |
| X12422-P1C3   | Venezuela      | Human                   | ND                   | 29 X                        |
| Colombiana    | Colombia       | Human                   | ND                   | 30 X                        |
| CGI10         | Colombia       | Human                   | Acute Co-infection   | 30 X                        |
| CGI11         | Colombia       | Human                   | Acute Co-infection   | 30 X                        |
| CGI12         | Colombia       | Human                   | Acute Co-infection   | 30 X                        |
| CGI13         | Colombia       | Human                   | Acute Co-infection   | 30 X                        |
| CGI14         | Colombia       | Human                   | Acute Co-infection   | 30 X                        |

|        |          |                     |                    |      |
|--------|----------|---------------------|--------------------|------|
| CGI15  | Colombia | Human               | Acute Co-infection | 30 X |
| FcHcl1 | Colombia | Human               | Acute Oral         | 30 X |
| FcHcl2 | Colombia | Human               | Acute Oral         | 30 X |
| FcHcl3 | Colombia | Human               | Acute Oral         | 30 X |
| FcHcl4 | Colombia | Human               | Acute Oral         | 30 X |
| FcHcl5 | Colombia | Human               | Acute Oral         | 30 X |
| H1b    | Mexico   | Human               | Acute              | 32 X |
| TD23   | Texas    | <i>T. dimidiata</i> | ND                 | 30 X |
| TD25   | Texas    | <i>T. dimidiata</i> | ND                 | 30 X |

---

NA = Not determined.

\* Illumina data
