# Supplementary material for: Repeat-Driven Generation of Antigenic Diversity in a Major Human Pathogen, Trypanosoma cruzi
Source: PubMed Central journal article supplement (PMC7966520; doi:10.3389/fcimb.2021.614665), 2021-03-03
Supplement: DataSheet_2.pdf [file DataSheet_2.pdf]

Supplementary Table 2.

| Tcl chromosome | Start   | End     | TcVI chromosome | Start   | End     |
|----------------|---------|---------|-----------------|---------|---------|
| 1              | 7856    | 77686   | 36              | 929579  | 450980  |
| 1              | 83489   | 88732   | 36              | 926768  | 924310  |
| 1              | 133750  | 167254  | 36              | 852285  | 886001  |
| 1              | 273687  | 494393  | 36              | 612805  | 744997  |
| 1              | 450605  | 536813  | 36              | 472531  | 550117  |
| 1              | 558773  | 585115  | 36              | 955061  | 954896  |
| 1              | 745948  | 801318  | 36              | 452202  | 408279  |
| 1              | 858072  | 950310  | 36              | 297087  | 387808  |
| 1              | 951485  | 966822  | 36              | 294640  | 281513  |
| 1              | 1017124 | 1090220 | 36              | 165729  | 226185  |
| 1              | 1132170 | 1195287 | 36              | 71875   | 123492  |
| 1              | 1219022 | 1226231 | 36              | 28750   | 36118   |
| 1              | 1387897 | 1399200 | 37              | 608730  | 599838  |
| 1              | 1588345 | 1620727 | 37              | 719134  | 723564  |
| 1              | 1630647 | 1641246 | 37              | 742449  | 733498  |
| 1              | 1654666 | 1834100 | 37              | 756633  | 793427  |
| 1              | 1962391 | 1980284 | 37              | 958682  | 954960  |
| 1              | 2002380 | 2073379 | 37              | 990728  | 1019194 |
| 1              | 2120689 | 2134495 | 37              | 1101714 | 1089576 |
| 1              | 2266301 | 2486930 | 37              | 1288260 | 1254200 |
| 1              | 2457588 | 2470650 | 37              | 1272816 | 1275507 |
| 1              | 2705936 | 2741331 | 21              | 509184  | 492638  |
| 1              | 2764952 | 3057081 | 21              | 151987  | 451049  |
| 1              | 3077230 | 3082308 | 21              | 100516  | 105611  |
| 2              | 24587   | 406636  | 40              | 1051196 | 813126  |
| 2              | 231884  | 365128  | 40              | 901785  | 965191  |
| 2              | 455356  | 467278  | 40              | 1118606 | 1114534 |
| 2              | 515174  | 567806  | 28              | 682218  | 341363  |
| 2              | 748858  | 787291  | 40              | 1758882 | 1795536 |
| 2              | 811459  | 855888  | 40              | 1860430 | 1829147 |
| 2              | 874231  | 878022  | 40              | 1882685 | 1882080 |
| 2              | 910082  | 953323  | 40              | 1973257 | 1931928 |
| 3              | 150274  | 311269  | 29              | 673901  | 828309  |
| 3              | 237698  | 239549  | 29              | 743531  | 747694  |
| 3              | 368762  | 582555  | 29              | 614857  | 472673  |
| 3              | 417337  | 683787  | 29              | 5663    | 136301  |
| 3              | 968897  | 1064333 | 11              | 165441  | 193031  |
| 3              | 1109612 | 1239660 | 11              | 286135  | 390576  |
| 3              | 1329429 | 1335991 | 11              | 412124  | 419434  |
| 3              | 1395258 | 1401140 | 11              | 479862  | 485767  |
| 4              | 11328   | 70106   | 31              | 400527  | 402233  |
| 4              | 78689   | 116525  | 31              | 388935  | 356811  |
| 4              | 84626   | 90244   | 31              | 362593  | 368310  |
| 4              | 278770  | 300602  | 31              | 425887  | 428888  |
| 4              | 449536  | 525299  | 31              | 416246  | 442013  |
| 4              | 1073464 | 1082600 | 30              | 46352   | 56129   |
| 4              | 1157507 | 1375702 | 30              | 231107  | 71481   |
| 4              | 1494015 | 1508440 | 30              | 327937  | 339413  |
| 5              | 168032  | 247858  | 34              | 636401  | 557228  |
| 5              | 375510  | 392135  | 34              | 478981  | 469467  |
| 5              | 477005  | 496974  | 34              | 374885  | 356749  |
| 5              | 504483  | 630637  | 34              | 275830  | 338704  |
| 5              | 584231  | 586021  | 34              | 261540  | 261142  |

|    |         |         |    |         |         |
|----|---------|---------|----|---------|---------|
| 5  | 708666  | 735766  | 34 | 136393  | 110812  |
| 5  | 881049  | 953130  | 26 | 459194  | 520334  |
| 5  | 1004744 | 1107077 | 26 | 629660  | 672620  |
| 5  | 1090998 | 1157855 | 26 | 723339  | 662921  |
| 5  | 1212950 | 1287111 | 22 | 289290  | 393019  |
| 6  | 37006   | 248369  | 3  | 151803  | 100844  |
| 6  | 776794  | 870058  | 31 | 456164  | 295434  |
| 6  | 962796  | 994842  | 31 | 169207  | 165383  |
| 6  | 1129070 | 1160194 | 25 | 767102  | 408329  |
| 7  | 167876  | 328998  | 2  | 71990   | 4855    |
| 7  | 595262  | 607031  | 9  | 457347  | 469319  |
| 7  | 948185  | 953722  | 7  | 154563  | 160232  |
| 7  | 963317  | 1157108 | 7  | 192261  | 261309  |
| 7  | 1440907 | 1617960 | 38 | 552180  | 762060  |
| 7  | 1512505 | 1656726 | 29 | 200001  | 375357  |
| 7  | 1697201 | 1711418 | 18 | 297739  | 340376  |
| 7  | 1720456 | 1775850 | 38 | 726777  | 897652  |
| 7  | 1791743 | 1879080 | 41 | 2076276 | 2098145 |
| 8  | 212362  | 222416  | 34 | 670906  | 290876  |
| 8  | 270925  | 292231  | 41 | 540003  | 520288  |
| 8  | 757598  | 894741  | 4  | 1580    | 140382  |
| 9  | 132943  | 253709  | 27 | 120105  | 179273  |
| 9  | 265682  | 336709  | 27 | 214056  | 208092  |
| 9  | 441812  | 667575  | 27 | 451676  | 321428  |
| 9  | 778836  | 819555  | 27 | 611131  | 572655  |
| 9  | 924249  | 992063  | 27 | 782104  | 442770  |
| 9  | 1019045 | 1050287 | 27 | 822539  | 828797  |
| 10 | 521024  | 522732  | 39 | 342553  | 341783  |
| 10 | 693760  | 731592  | 39 | 411584  | 432058  |
| 10 | 932197  | 972406  | 39 | 545842  | 507602  |
| 10 | 1015976 | 1032451 | 39 | 590001  | 606683  |
| 11 | 206347  | 308978  | 23 | 464864  | 540015  |
| 11 | 302266  | 642669  | 23 | 398754  | 427159  |
| 11 | 596278  | 737402  | 23 | 127993  | 285278  |
| 11 | 800414  | 817093  | 23 | 30248   | 25891   |
| 11 | 851247  | 1009042 | 35 | 459205  | 572850  |
| 11 | 900817  | 904654  | 35 | 522354  | 526242  |
| 11 | 916942  | 921753  | 35 | 538682  | 543479  |
| 11 | 1017217 | 1020599 | 31 | 648854  | 765769  |
| 11 | 1030776 | 1043034 | 35 | 620597  | 614294  |
| 12 | 138083  | 155473  | 14 | 514882  | 532288  |
| 12 | 286266  | 329704  | 14 | 370376  | 401923  |
| 12 | 417309  | 562302  | 40 | 166126  | 1732611 |
| 12 | 539409  | 552519  | 14 | 320717  | 333817  |
| 12 | 938031  | 1014502 | 14 | 83019   | 107491  |
| 13 | 278972  | 298184  | 28 | 35950   | 14587   |
| 13 | 412025  | 509703  | 12 | 123806  | 181858  |
| 13 | 540150  | 781065  | 12 | 366705  | 440546  |
| 13 | 624819  | 756622  | 12 | 368712  | 282329  |
| 13 | 787148  | 883835  | 12 | 461179  | 449570  |
| 14 | 525496  | 561759  | 24 | 471323  | 673169  |
| 14 | 806378  | 911887  | 26 | 102142  | 196621  |
| 15 | 114987  | 228201  | 33 | 700523  | 619274  |
| 15 | 133787  | 244189  | 33 | 660742  | 586846  |

|    |         |         |    |         |         |
|----|---------|---------|----|---------|---------|
| 15 | 265381  | 277196  | 33 | 546091  | 558009  |
| 15 | 394640  | 512341  | 37 | 498269  | 416753  |
| 15 | 453188  | 593585  | 37 | 334353  | 453516  |
| 15 | 613173  | 615696  | 37 | 311833  | 314550  |
| 15 | 620342  | 744999  | 37 | 270995  | 284839  |
| 15 | 752073  | 843026  | 37 | 210818  | 187959  |
| 15 | 853544  | 929839  | 37 | 124702  | 116133  |
| 16 | 182974  | 216099  | 33 | 134968  | 107792  |
| 16 | 211716  | 355944  | 33 | 131729  | 197716  |
| 16 | 385778  | 443378  | 33 | 460303  | 526425  |
| 16 | 446232  | 882525  | 32 | 167145  | 548677  |
| 16 | 871229  | 1045104 | 9  | 94085   | 208835  |
| 16 | 1142767 | 1194348 | 35 | 325939  | 280327  |
| 16 | 1150201 | 1456912 | 35 | 418504  | 143405  |
| 16 | 1274500 | 1313885 | 35 | 195045  | 172318  |
| 16 | 1383492 | 1427962 | 35 | 97700   | 387801  |
| 18 | 16564   | 109640  | 41 | 2314639 | 2222571 |
| 18 | 296681  | 317572  | 20 | 40718   | 34043   |
| 18 | 337689  | 454007  | 20 | 64221   | 62505   |
| 18 | 407741  | 415309  | 20 | 128227  | 135821  |
| 18 | 475608  | 524402  | 20 | 229600  | 201482  |
| 18 | 549119  | 566830  | 20 | 270794  | 288649  |
| 18 | 601270  | 696006  | 20 | 366089  | 532553  |
| 18 | 648736  | 654622  | 20 | 352695  | 348422  |
| 18 | 720384  | 733176  | 20 | 435711  | 424502  |
| 19 | 249779  | 264539  | 39 | 1817821 | 1819365 |
| 19 | 280118  | 304806  | 39 | 1774251 | 1783214 |
| 19 | 378049  | 395762  | 39 | 1679330 | 1697527 |
| 19 | 418886  | 430228  | 39 | 1659357 | 1648769 |
| 19 | 447115  | 720370  | 39 | 1630774 | 1364386 |
| 19 | 701169  | 739121  | 39 | 1381823 | 1343283 |
| 19 | 739159  | 776802  | 39 | 1337975 | 1309235 |
| 20 | 26583   | 184770  | 16 | 376916  | 365088  |
| 20 | 316309  | 347892  | 16 | 538580  | 521748  |
| 20 | 451945  | 484407  | 39 | 1032275 | 1288402 |
| 20 | 481924  | 517113  | 38 | 804104  | 339772  |
| 20 | 485435  | 532471  | 16 | 476408  | 460428  |
| 20 | 549962  | 555156  | 16 | 409318  | 414690  |
| 20 | 560887  | 564962  | 16 | 420390  | 425192  |
| 21 | 50378   | 52010   | 26 | 226619  | 228336  |
| 21 | 158996  | 174747  | 40 | 118135  | 134214  |
| 21 | 207272  | 290184  | 40 | 238944  | 168204  |
| 21 | 322439  | 696749  | 40 | 633398  | 283435  |
| 21 | 350539  | 408136  | 40 | 367209  | 311300  |
| 22 | 34303   | 70754   | 41 | 1576114 | 1050401 |
| 22 | 503823  | 609479  | 41 | 1806623 | 974933  |
| 23 | 500144  | 534712  | 38 | 235419  | 200863  |
| 23 | 539689  | 543963  | 38 | 193759  | 191606  |
| 23 | 564632  | 672687  | 38 | 55314   | 107492  |
| 23 | 603557  | 651448  | 38 | 79246   | 125130  |
| 24 | 57258   | 61659   | 41 | 1590720 | 1135481 |
| 24 | 92474   | 117966  | 38 | 1145835 | 603942  |
| 24 | 142984  | 168000  | 41 | 870805  | 875998  |
| 24 | 198339  | 365874  | 41 | 849029  | 568465  |

|    |        |        |    |         |         |
|----|--------|--------|----|---------|---------|
| 25 | 49900  | 56040  | 39 | 838177  | 844105  |
| 26 | 35536  | 118173 | 32 | 454286  | 473823  |
| 26 | 138951 | 241566 | 32 | 558693  | 627874  |
| 26 | 253028 | 280471 | 32 | 676177  | 690927  |
| 26 | 285969 | 306199 | 32 | 723912  | 723569  |
| 26 | 334962 | 420984 | 32 | 758725  | 846138  |
| 26 | 342791 | 349141 | 32 | 764921  | 771487  |
| 26 | 399338 | 429210 | 32 | 820380  | 853154  |
| 27 | 29202  | 31988  | 35 | 768696  | 771526  |
| 27 | 85263  | 379733 | 35 | 848356  | 1074337 |
| 27 | 386785 | 414388 | 35 | 1083248 | 1085368 |
| 28 | 280381 | 284143 | 15 | 390049  | 393870  |
| 28 | 289944 | 335706 | 15 | 383171  | 373573  |
| 28 | 346002 | 512546 | 15 | 121446  | 341253  |
| 28 | 411420 | 576889 | 15 | 269181  | 23758   |
| 29 | 74121  | 285558 | 8  | 151616  | 181606  |
| 29 | 204073 | 292364 | 8  | 334568  | 238565  |
| 30 | 31580  | 51972  | 41 | 1614684 | 1086746 |
| 30 | 415099 | 494433 | 41 | 288998  | 297612  |
| 31 | 9716   | 62944  | 41 | 119463  | 159972  |
| 31 | 332342 | 370945 | 33 | 873160  | 842769  |
| 31 | 392913 | 418156 | 33 | 888226  | 950619  |
| 31 | 430800 | 442394 | 33 | 982667  | 972255  |
| 32 | 477807 | 826834 | 17 | 283640  | 604898  |
| 32 | 523385 | 548251 | 17 | 539354  | 564547  |
| 32 | 896023 | 932018 | 17 | 212711  | 190476  |
| 33 | 49493  | 98307  | 38 | 947735  | 947466  |
| 33 | 313139 | 411647 | 28 | 161086  | 63881   |
| 34 | 373479 | 405122 | 21 | 161131  | 179455  |
| 34 | 443634 | 448683 | 25 | 658949  | 663188  |
| 35 | 244386 | 268575 | 32 | 153282  | 130006  |
| 35 | 275620 | 296821 | 32 | 180941  | 161796  |
| 35 | 340016 | 348259 | 32 | 221002  | 229607  |
| 35 | 397152 | 436735 | 32 | 269817  | 272179  |
| 35 | 520752 | 525378 | 32 | 260562  | 257305  |
| 36 | 95766  | 174434 | 5  | 172281  | 119417  |
| 36 | 203387 | 269661 | 5  | 52942   | 44606   |
| 36 | 341598 | 501394 | 10 | 81256   | 234890  |
| 37 | 128966 | 160029 | 22 | 213902  | 286257  |
| 37 | 176059 | 253406 | 22 | 310188  | 378249  |
| 37 | 291498 | 327700 | 22 | 446340  | 436210  |
| 37 | 366314 | 393259 | 22 | 487798  | 518033  |
| 37 | 409440 | 423762 | 22 | 547508  | 534773  |
| 38 | 90363  | 439040 | 6  | 331705  | 200376  |
| 38 | 197076 | 379081 | 6  | 214427  | 210653  |
| 39 | 8358   | 165147 | 30 | 523731  | 382599  |
| 39 | 123286 | 135252 | 30 | 482114  | 494109  |
| 39 | 232544 | 245196 | 30 | 582047  | 589056  |
| 40 | 29310  | 426004 | 27 | 508175  | 495024  |
| 41 | 154725 | 246127 | 25 | 166168  | 84892   |
| 41 | 225981 | 307744 | 25 | 226581  | 150244  |
| 41 | 295566 | 358697 | 25 | 235900  | 218404  |
| 42 | 35715  | 611185 | 24 | 197730  | 351772  |
| 42 | 750268 | 792639 | 1  | 42755   | 28807   |

|    |        |        |    |         |         |
|----|--------|--------|----|---------|---------|
| 43 | 27839  | 70867  | 34 | 963430  | 975936  |
| 43 | 80967  | 386137 | 34 | 786390  | 932980  |
| 43 | 325095 | 417297 | 34 | 779940  | 783035  |
| 44 | 92955  | 290340 | 13 | 297981  | 472842  |
| 44 | 416696 | 423156 | 13 | 153107  | 159843  |
| 45 | 82032  | 87932  | 19 | 541212  | 539272  |
| 45 | 121216 | 263207 | 19 | 508001  | 435564  |
| 46 | 233500 | 261791 | 38 | 1290994 | 1263902 |
| 46 | 319686 | 339832 | 8  | 352018  | 346408  |
