# Supplementary material for: Repeat-Driven Generation of Antigenic Diversity in a Major Human Pathogen, Trypanosoma cruzi
Source: PubMed Central journal article supplement (PMC7966520; doi:10.3389/fcimb.2021.614665), 2021-03-03
Supplement: DataSheet_3.pdf [file DataSheet_3.pdf]

Supplementary table 3.

| Chromosome | startR | stopR  | strand | repeat                           |
|------------|--------|--------|--------|----------------------------------|
| 1          | 45727  | 46301  | +      | Target "Motif:TcVIPER" 18 603    |
| 1          | 46380  | 46897  | +      | Target "Motif:TcVIPER" 807 1307  |
| 1          | 46913  | 49634  | +      | Target "Motif:TcVIPER" 1381 4182 |
| 1          | 49715  | 49779  | +      | Target "Motif:TcVIPER" 4322 4389 |
| 1          | 62471  | 63040  | +      | Target "Motif:TcVIPER" 18 601    |
| 1          | 63136  | 63640  | +      | Target "Motif:TcVIPER" 823 1307  |
| 1          | 63656  | 66383  | +      | Target "Motif:TcVIPER" 1381 4182 |
| 1          | 66464  | 66529  | +      | Target "Motif:TcVIPER" 4322 4389 |
| 1          | 70104  | 70201  | +      | Target "Motif:TcVIPER" 33 126    |
| 1          | 70194  | 70715  | +      | Target "Motif:TcVIPER" 67 601    |
| 1          | 70813  | 71321  | +      | Target "Motif:TcVIPER" 823 1307  |
| 1          | 71337  | 74064  | +      | Target "Motif:TcVIPER" 1381 4182 |
| 1          | 74145  | 74211  | +      | Target "Motif:TcVIPER" 4322 4389 |
| 1          | 96944  | 97408  | +      | Target "Motif:TcVIPER" 4169 4390 |
| 1          | 101122 | 105324 | +      | Target "Motif:TcVIPER" 1 4221    |
| 1          | 101122 | 105324 | +      | Target "Motif:TcVIPER" 1 4221    |
| 1          | 119280 | 121660 | +      | Target "Motif:TcVIPER" 1801 4182 |
| 1          | 538936 | 539433 | -      | Target "Motif:TcVIPER" 823 1307  |
| 1          | 539530 | 540105 | -      | Target "Motif:TcVIPER" 18 601    |
| 1          | 543285 | 543811 | -      | Target "Motif:TcVIPER" 1381 1947 |
| 1          | 543827 | 544332 | -      | Target "Motif:TcVIPER" 823 1307  |
| 1          | 544430 | 545000 | -      | Target "Motif:TcVIPER" 19 601    |
| 1          | 552644 | 556142 | -      | Target "Motif:TcVIPER" 666 4182  |
| 1          | 606842 | 609586 | -      | Target "Motif:TcVIPER" 1381 4182 |
| 1          | 609602 | 610109 | -      | Target "Motif:TcVIPER" 823 1307  |
| 1          | 610207 | 610780 | -      | Target "Motif:TcVIPER" 19 601    |
| 1          | 615851 | 616345 | -      | Target "Motif:TcVIPER" 1519 2006 |
| 1          | 616379 | 616436 | -      | Target "Motif:TcVIPER" 1381 1437 |
| 1          | 616452 | 616954 | -      | Target "Motif:TcVIPER" 823 1307  |
| 1          | 617052 | 617622 | -      | Target "Motif:TcVIPER" 16 601    |
| 1          | 625217 | 625287 | -      | Target "Motif:TcVIPER" 4320 4389 |
| 1          | 625362 | 628095 | -      | Target "Motif:TcVIPER" 1381 4182 |
| 1          | 628111 | 628617 | -      | Target "Motif:TcVIPER" 823 1307  |
| 1          | 628715 | 629279 | -      | Target "Motif:TcVIPER" 27 601    |
| 1          | 641837 | 641901 | -      | Target "Motif:TcVIPER" 4322 4389 |
| 1          | 641981 | 644685 | -      | Target "Motif:TcVIPER" 1381 4182 |
| 1          | 644701 | 645207 | -      | Target "Motif:TcVIPER" 823 1307  |
| 1          | 645306 | 645894 | -      | Target "Motif:TcVIPER" 1 601     |
| 1          | 650459 | 651044 | -      | Target "Motif:TcVIPER" 1 603     |
| 1          | 658629 | 661351 | -      | Target "Motif:TcVIPER" 1381 4182 |
| 1          | 661367 | 661870 | -      | Target "Motif:TcVIPER" 823 1307  |
| 1          | 661968 | 662546 | -      | Target "Motif:TcVIPER" 1 594     |
| 1          | 675118 | 677864 | -      | Target "Motif:TcVIPER" 1381 4182 |
| 1          | 675118 | 677864 | -      | Target "Motif:TcVIPER" 1381 4182 |
| 1          | 675118 | 677864 | -      | Target "Motif:TcVIPER" 1381 4182 |

|   |         |         |   |                                  |
|---|---------|---------|---|----------------------------------|
| 1 | 675118  | 677864  | - | Target "Motif:TcVIPER" 1381 4182 |
| 1 | 675118  | 677864  | - | Target "Motif:TcVIPER" 1381 4182 |
| 1 | 675118  | 677864  | - | Target "Motif:TcVIPER" 1381 4182 |
| 1 | 675118  | 677864  | - | Target "Motif:TcVIPER" 1381 4182 |
| 1 | 675118  | 677864  | - | Target "Motif:TcVIPER" 1381 4182 |
| 1 | 677880  | 678388  | - | Target "Motif:TcVIPER" 823 1307  |
| 1 | 678486  | 679080  | - | Target "Motif:TcVIPER" 1 601     |
| 1 | 686738  | 689392  | - | Target "Motif:TcVIPER" 1519 4182 |
| 1 | 694289  | 697035  | - | Target "Motif:TcVIPER" 1381 4182 |
| 1 | 697051  | 697559  | - | Target "Motif:TcVIPER" 823 1307  |
| 1 | 697657  | 698231  | - | Target "Motif:TcVIPER" 19 601    |
| 1 | 705804  | 705874  | - | Target "Motif:TcVIPER" 4320 4389 |
| 1 | 705951  | 708660  | - | Target "Motif:TcVIPER" 1381 4182 |
| 1 | 708676  | 708923  | - | Target "Motif:TcVIPER" 1062 1307 |
| 1 | 712121  | 714829  | - | Target "Motif:TcVIPER" 1381 4182 |
| 1 | 714845  | 714966  | - | Target "Motif:TcVIPER" 1186 1307 |
| 1 | 859655  | 861865  | - | Target "Motif:TcVIPER" 382 2644  |
| 1 | 859655  | 861865  | - | Target "Motif:TcVIPER" 382 2644  |
| 1 | 859655  | 861865  | - | Target "Motif:TcVIPER" 382 2644  |
| 1 | 859655  | 861865  | - | Target "Motif:TcVIPER" 382 2644  |
| 1 | 994504  | 994781  | + | Target "Motif:TcVIPER" 1555 1837 |
| 1 | 994775  | 996052  | + | Target "Motif:TcVIPER" 3117 4390 |
| 1 | 1003469 | 1003741 | + | Target "Motif:TcVIPER" 1558 1837 |
| 1 | 1003735 | 1004995 | + | Target "Motif:TcVIPER" 3117 4375 |
| 1 | 1014256 | 1014694 | + | Target "Motif:TcVIPER" 4167 4389 |
| 1 | 1020805 | 1021252 | + | Target "Motif:TcVIPER" 4167 4390 |
| 1 | 1066841 | 1067292 | + | Target "Motif:TcVIPER" 4167 4390 |
| 1 | 1246059 | 1250451 | + | Target "Motif:TcVIPER" 1 4390    |
| 1 | 1246059 | 1250451 | + | Target "Motif:TcVIPER" 1 4390    |
| 1 | 1263334 | 1264899 | + | Target "Motif:TcVIPER" 1 1525    |
| 1 | 1263334 | 1264899 | + | Target "Motif:TcVIPER" 1 1525    |
| 1 | 1264890 | 1267441 | + | Target "Motif:TcVIPER" 471 4221  |
| 1 | 1281670 | 1282432 | + | Target "Motif:TcVIPER" 12 782    |
| 1 | 1282447 | 1285884 | + | Target "Motif:TcVIPER" 917 4389  |
| 1 | 1287805 | 1290931 | + | Target "Motif:TcVIPER" 1238 4389 |
| 1 | 1889507 | 1890129 | + | Target "Motif:TcVIPER" 5 630     |
| 1 | 1890209 | 1893838 | + | Target "Motif:TcVIPER" 485 4224  |
| 1 | 1890209 | 1893838 | + | Target "Motif:TcVIPER" 485 4224  |
| 1 | 1902317 | 1902939 | + | Target "Motif:TcVIPER" 5 630     |
| 1 | 1903019 | 1903296 | + | Target "Motif:TcVIPER" 804 1057  |
| 1 | 2025998 | 2026040 | - | Target "Motif:TcVIPER" 4174 4214 |
| 1 | 2526175 | 2526238 | - | Target "Motif:TcVIPER" 4210 4274 |
| 1 | 2530391 | 2533479 | - | Target "Motif:TcVIPER" 1074 4209 |
| 1 | 2530391 | 2533479 | - | Target "Motif:TcVIPER" 1074 4209 |
| 1 | 2530391 | 2533479 | - | Target "Motif:TcVIPER" 1074 4209 |
| 1 | 2530391 | 2533479 | - | Target "Motif:TcVIPER" 1074 4209 |

|    |         |         |   |                                  |
|----|---------|---------|---|----------------------------------|
| 1  | 2530391 | 2533479 | - | Target "Motif:TcVIPER" 1074 4209 |
| 1  | 2684975 | 2685423 | + | Target "Motif:TcVIPER" 4167 4389 |
| 1  | 3103921 | 3104139 | + | Target "Motif:TcVIPER" 4179 4389 |
| 10 | 525983  | 526053  | + | Target "Motif:TcVIPER" 4326 4389 |
| 10 | 727041  | 727112  | - | Target "Motif:TcVIPER" 4326 4390 |
| 10 | 903254  | 906691  | - | Target "Motif:TcVIPER" 914 4390  |
| 10 | 903254  | 906691  | - | Target "Motif:TcVIPER" 914 4390  |
| 10 | 903254  | 906691  | - | Target "Motif:TcVIPER" 914 4390  |
| 10 | 906781  | 907408  | - | Target "Motif:TcVIPER" 16 692    |
| 10 | 907950  | 912293  | + | Target "Motif:TcVIPER" 1 4390    |
| 10 | 907950  | 912293  | + | Target "Motif:TcVIPER" 1 4390    |
| 10 | 977680  | 977717  | + | Target "Motif:TcVIPER" 7 46      |
| 10 | 977908  | 978491  | + | Target "Motif:TcVIPER" 47 692    |
| 10 | 978580  | 981769  | + | Target "Motif:TcVIPER" 916 4224  |
| 10 | 978580  | 981769  | + | Target "Motif:TcVIPER" 916 4224  |
| 10 | 1067454 | 1071775 | + | Target "Motif:TcVIPER" 1 4390    |
| 10 | 1067454 | 1071775 | + | Target "Motif:TcVIPER" 1 4390    |
| 10 | 1067454 | 1071775 | + | Target "Motif:TcVIPER" 1 4390    |
| 10 | 1067454 | 1071775 | + | Target "Motif:TcVIPER" 1 4390    |
| 10 | 1067454 | 1071775 | + | Target "Motif:TcVIPER" 1 4390    |
| 10 | 1067454 | 1071775 | + | Target "Motif:TcVIPER" 1 4390    |
| 10 | 1067454 | 1071775 | + | Target "Motif:TcVIPER" 1 4390    |
| 11 | 150211  | 153210  | - | Target "Motif:TcVIPER" 1169 4182 |
| 11 | 153242  | 153863  | - | Target "Motif:TcVIPER" 1 620     |
| 11 | 153242  | 153863  | - | Target "Motif:TcVIPER" 1 620     |
| 11 | 688436  | 688507  | - | Target "Motif:TcVIPER" 4321 4389 |
| 11 | 712254  | 713097  | - | Target "Motif:TcVIPER" 3516 4390 |
| 11 | 713113  | 713730  | - | Target "Motif:TcVIPER" 2 629     |
| 11 | 772523  | 773392  | - | Target "Motif:TcVIPER" 3516 4390 |
| 11 | 773408  | 773850  | - | Target "Motif:TcVIPER" 184 629   |
| 12 | 34475   | 34596   | - | Target "Motif:TcVIPER" 4275 4389 |
| 12 | 45557   | 45769   | - | Target "Motif:TcVIPER" 4179 4389 |
| 12 | 53228   | 53442   | - | Target "Motif:TcVIPER" 4177 4389 |
| 12 | 76713   | 78856   | - | Target "Motif:TcVIPER" 2053 4216 |
| 12 | 78862   | 79711   | - | Target "Motif:TcVIPER" 917 1772  |
| 12 | 79871   | 80505   | - | Target "Motif:TcVIPER" 1 634     |
| 12 | 82984   | 85115   | - | Target "Motif:TcVIPER" 2053 4216 |
| 12 | 85123   | 85967   | - | Target "Motif:TcVIPER" 917 1769  |
| 12 | 86127   | 86755   | - | Target "Motif:TcVIPER" 1 634     |
| 12 | 93621   | 93831   | - | Target "Motif:TcVIPER" 4323 4389 |
| 12 | 93832   | 94675   | - | Target "Motif:TcVIPER" 3385 4231 |
| 12 | 97322   | 97393   | + | Target "Motif:TcVIPER" 4323 4390 |
| 12 | 250176  | 250810  | + | Target "Motif:TcVIPER" 1 634     |
| 12 | 250969  | 251816  | + | Target "Motif:TcVIPER" 917 1772  |
| 12 | 251822  | 253991  | + | Target "Motif:TcVIPER" 717 4216  |
| 12 | 251822  | 253991  | + | Target "Motif:TcVIPER" 717 4216  |
| 12 | 256450  | 257084  | + | Target "Motif:TcVIPER" 1 634     |

|    |        |        |   |                                  |
|----|--------|--------|---|----------------------------------|
| 12 | 257245 | 258094 | + | Target "Motif:TcVIPER" 917 1772  |
| 12 | 258100 | 260277 | + | Target "Motif:TcVIPER" 717 4216  |
| 12 | 258100 | 260277 | + | Target "Motif:TcVIPER" 717 4216  |
| 12 | 262744 | 263378 | + | Target "Motif:TcVIPER" 1 634     |
| 12 | 263539 | 264383 | + | Target "Motif:TcVIPER" 917 1769  |
| 12 | 264391 | 266557 | + | Target "Motif:TcVIPER" 717 4216  |
| 12 | 275268 | 279510 | - | Target "Motif:TcVIPER" 3 4236    |
| 12 | 275268 | 279510 | - | Target "Motif:TcVIPER" 3 4236    |
| 12 | 339975 | 340606 | + | Target "Motif:TcVIPER" 1 634     |
| 12 | 340765 | 341614 | + | Target "Motif:TcVIPER" 917 1772  |
| 12 | 341620 | 343756 | + | Target "Motif:TcVIPER" 2053 4216 |
| 12 | 346221 | 346848 | + | Target "Motif:TcVIPER" 1 630     |
| 12 | 347008 | 347403 | + | Target "Motif:TcVIPER" 917 1304  |
| 12 | 348477 | 348923 | + | Target "Motif:TcVIPER" 1309 1772 |
| 12 | 348929 | 351063 | + | Target "Motif:TcVIPER" 2053 4216 |
| 12 | 364685 | 365317 | + | Target "Motif:TcVIPER" 1 634     |
| 12 | 365385 | 366317 | + | Target "Motif:TcVIPER" 797 1772  |
| 12 | 366323 | 368455 | + | Target "Motif:TcVIPER" 2053 4216 |
| 12 | 370936 | 371570 | + | Target "Motif:TcVIPER" 1 634     |
| 12 | 371637 | 372578 | + | Target "Motif:TcVIPER" 797 1772  |
| 12 | 372584 | 374730 | + | Target "Motif:TcVIPER" 2053 4216 |
| 12 | 388552 | 392797 | - | Target "Motif:TcVIPER" 3 4236    |
| 12 | 388552 | 392797 | - | Target "Motif:TcVIPER" 3 4236    |
| 12 | 399726 | 400090 | + | Target "Motif:TcVIPER" 3847 4216 |
| 12 | 940213 | 941732 | + | Target "Motif:TcVIPER" 1953 3485 |
| 12 | 942203 | 942317 | - | Target "Motif:TcVIPER" 4100 4216 |
| 12 | 947472 | 947637 | - | Target "Motif:TcVIPER" 1953 2121 |
| 13 | 231581 | 234562 | - | Target "Motif:TcVIPER" 1372 4389 |
| 13 | 231581 | 234562 | - | Target "Motif:TcVIPER" 1372 4389 |
| 13 | 234576 | 234957 | - | Target "Motif:TcVIPER" 917 1300  |
| 13 | 235168 | 235750 | - | Target "Motif:TcVIPER" 52 620    |
| 13 | 315339 | 315511 | - | Target "Motif:TcVIPER" 1381 1521 |
| 13 | 315528 | 316082 | - | Target "Motif:TcVIPER" 770 1301  |
| 13 | 316130 | 316685 | - | Target "Motif:TcVIPER" 4 634     |
| 13 | 541229 | 541484 | + | Target "Motif:TcVIPER" 4167 4236 |
| 13 | 568301 | 570280 | - | Target "Motif:TcVIPER" 2410 4389 |
| 13 | 570257 | 570543 | - | Target "Motif:TcVIPER" 1787 2077 |
| 13 | 570547 | 571664 | - | Target "Motif:TcVIPER" 128 1275  |
| 13 | 577234 | 579600 | + | Target "Motif:TcVIPER" 444 4390  |
| 14 | 265683 | 268852 | + | Target "Motif:TcVIPER" 10 3146   |
| 14 | 265683 | 268852 | + | Target "Motif:TcVIPER" 10 3146   |
| 14 | 265683 | 268852 | + | Target "Motif:TcVIPER" 10 3146   |
| 14 | 265683 | 268852 | + | Target "Motif:TcVIPER" 10 3146   |
| 14 | 265683 | 268852 | + | Target "Motif:TcVIPER" 10 3146   |
| 14 | 265683 | 268852 | + | Target "Motif:TcVIPER" 10 3146   |
| 14 | 336872 | 337457 | + | Target "Motif:TcVIPER" 52 620    |

|    |        |        |   |                                  |
|----|--------|--------|---|----------------------------------|
| 14 | 337574 | 338068 | + | Target "Motif:TcVIPER" 819 1296  |
| 14 | 344765 | 345941 | + | Target "Motif:TcVIPER" 3168 4389 |
| 14 | 429584 | 432522 | - | Target "Motif:TcVIPER" 1372 4389 |
| 14 | 429584 | 432522 | - | Target "Motif:TcVIPER" 1372 4389 |
| 14 | 432536 | 433036 | - | Target "Motif:TcVIPER" 819 1300  |
| 14 | 433134 | 433725 | - | Target "Motif:TcVIPER" 52 620    |
| 14 | 437712 | 440384 | - | Target "Motif:TcVIPER" 1372 4117 |
| 14 | 440396 | 440782 | - | Target "Motif:TcVIPER" 917 1300  |
| 14 | 440992 | 441583 | - | Target "Motif:TcVIPER" 52 620    |
| 15 | 18946  | 23318  | - | Target "Motif:TcVIPER" 1 4390    |
| 15 | 18946  | 23318  | - | Target "Motif:TcVIPER" 1 4390    |
| 15 | 31327  | 34465  | - | Target "Motif:TcVIPER" 1074 4221 |
| 15 | 85483  | 85554  | - | Target "Motif:TcVIPER" 4322 4389 |
| 15 | 243093 | 243554 | - | Target "Motif:TcVIPER" 4167 4390 |
| 15 | 284039 | 286740 | + | Target "Motif:TcVIPER" 1 2737    |
| 15 | 378526 | 382769 | - | Target "Motif:TcVIPER" 123 4389  |
| 15 | 378526 | 382769 | - | Target "Motif:TcVIPER" 123 4389  |
| 15 | 378526 | 382769 | - | Target "Motif:TcVIPER" 123 4389  |
| 15 | 378526 | 382769 | - | Target "Motif:TcVIPER" 123 4389  |
| 15 | 389248 | 390447 | - | Target "Motif:TcVIPER" 1 1220    |
| 15 | 408040 | 408110 | - | Target "Motif:TcVIPER" 4325 4390 |
| 15 | 412662 | 412732 | - | Target "Motif:TcVIPER" 4325 4390 |
| 15 | 417265 | 417335 | - | Target "Motif:TcVIPER" 4325 4390 |
| 15 | 421846 | 421916 | - | Target "Motif:TcVIPER" 4325 4390 |
| 15 | 426428 | 426498 | - | Target "Motif:TcVIPER" 4325 4390 |
| 15 | 778941 | 778988 | - | Target "Motif:TcVIPER" 4342 4390 |
| 15 | 779719 | 781753 | + | Target "Motif:TcVIPER" 3 2056    |
| 15 | 779719 | 781753 | + | Target "Motif:TcVIPER" 3 2056    |
| 15 | 779719 | 781753 | + | Target "Motif:TcVIPER" 3 2056    |
| 15 | 933941 | 937349 | - | Target "Motif:TcVIPER" 786 4209  |
| 15 | 933941 | 937349 | - | Target "Motif:TcVIPER" 786 4209  |
| 15 | 937365 | 937884 | - | Target "Motif:TcVIPER" 243 806   |
| 15 | 948314 | 948753 | - | Target "Motif:TcVIPER" 4167 4390 |
| 16 | 1016   | 5252   | + | Target "Motif:TcVIPER" 1 4267    |
| 16 | 532472 | 533518 | - | Target "Motif:TcVIPER" 3336 4389 |
| 16 | 538317 | 540270 | - | Target "Motif:TcVIPER" 1372 3347 |
| 16 | 540284 | 540669 | - | Target "Motif:TcVIPER" 917 1300  |
| 16 | 540882 | 541457 | - | Target "Motif:TcVIPER" 52 620    |
| 16 | 552716 | 554166 | + | Target "Motif:TcVIPER" 2900 4376 |
| 16 | 563465 | 567768 | - | Target "Motif:TcVIPER" 1 4390    |
| 16 | 578608 | 582948 | + | Target "Motif:TcVIPER" 1 4390    |
| 16 | 668089 | 668118 | + | Target "Motif:TcVIPER" 4377 4390 |
| 16 | 747016 | 747184 | - | Target "Motif:TcVIPER" 4271 4390 |
| 16 | 929859 | 931449 | - | Target "Motif:TcVIPER" 2807 4387 |
| 16 | 985639 | 989996 | - | Target "Motif:TcVIPER" 1 4390    |
| 16 | 985639 | 989996 | - | Target "Motif:TcVIPER" 1 4390    |

|    |         |         |   |                                  |
|----|---------|---------|---|----------------------------------|
| 16 | 1115432 | 1118877 | - | Target "Motif:TcVIPER" 935 4390  |
| 16 | 1115432 | 1118877 | - | Target "Motif:TcVIPER" 935 4390  |
| 16 | 1115432 | 1118877 | - | Target "Motif:TcVIPER" 935 4390  |
| 16 | 1115432 | 1118877 | - | Target "Motif:TcVIPER" 935 4390  |
| 16 | 1115432 | 1118877 | - | Target "Motif:TcVIPER" 935 4390  |
| 16 | 1118911 | 1119674 | - | Target "Motif:TcVIPER" 12 782    |
| 16 | 1291859 | 1292309 | + | Target "Motif:TcVIPER" 4167 4390 |
| 18 | 210756  | 213747  | - | Target "Motif:TcVIPER" 1372 4389 |
| 18 | 210756  | 213747  | - | Target "Motif:TcVIPER" 1372 4389 |
| 18 | 210756  | 213747  | - | Target "Motif:TcVIPER" 1372 4389 |
| 18 | 213761  | 214135  | - | Target "Motif:TcVIPER" 917 1300  |
| 18 | 214345  | 214924  | - | Target "Motif:TcVIPER" 52 620    |
| 18 | 225845  | 226536  | - | Target "Motif:TcVIPER" 1169 1854 |
| 18 | 226554  | 227172  | - | Target "Motif:TcVIPER" 1 634     |
| 18 | 251911  | 254868  | - | Target "Motif:TcVIPER" 1372 4389 |
| 18 | 254882  | 255376  | - | Target "Motif:TcVIPER" 819 1300  |
| 18 | 255498  | 256027  | - | Target "Motif:TcVIPER" 66 594    |
| 18 | 571096  | 571736  | + | Target "Motif:TcVIPER" 5 630     |
| 18 | 571788  | 575323  | + | Target "Motif:TcVIPER" 717 4264  |
| 18 | 580298  | 580936  | + | Target "Motif:TcVIPER" 5 630     |
| 18 | 581026  | 583454  | + | Target "Motif:TcVIPER" 816 3239  |
| 18 | 581026  | 583454  | + | Target "Motif:TcVIPER" 816 3239  |
| 18 | 581026  | 583454  | + | Target "Motif:TcVIPER" 816 3239  |
| 18 | 581026  | 583454  | + | Target "Motif:TcVIPER" 816 3239  |
| 18 | 581026  | 583454  | + | Target "Motif:TcVIPER" 816 3239  |
| 18 | 588480  | 589164  | + | Target "Motif:TcVIPER" 5 686     |
| 18 | 589216  | 592726  | + | Target "Motif:TcVIPER" 717 4264  |
| 18 | 597696  | 598374  | + | Target "Motif:TcVIPER" 5 686     |
| 18 | 598436  | 599022  | + | Target "Motif:TcVIPER" 770 1335  |
| 18 | 603854  | 604543  | + | Target "Motif:TcVIPER" 5 686     |
| 18 | 604595  | 608099  | + | Target "Motif:TcVIPER" 770 4264  |
| 18 | 604595  | 608099  | + | Target "Motif:TcVIPER" 770 4264  |
| 19 | 29724   | 29791   | - | Target "Motif:TcVIPER" 4326 4389 |
| 19 | 119322  | 119992  | - | Target "Motif:TcVIPER" 3720 4390 |
| 19 | 126951  | 127021  | - | Target "Motif:TcVIPER" 4323 4389 |
| 19 | 314608  | 318568  | - | Target "Motif:TcVIPER" 443 4390  |
| 19 | 314608  | 318568  | - | Target "Motif:TcVIPER" 443 4390  |
| 19 | 399153  | 399758  | + | Target "Motif:TcVIPER" 3 630     |
| 19 | 399845  | 400115  | + | Target "Motif:TcVIPER" 813 1066  |
| 19 | 400115  | 402260  | + | Target "Motif:TcVIPER" 2234 4389 |
| 19 | 420128  | 420573  | + | Target "Motif:TcVIPER" 4167 4390 |
| 2  | 474899  | 474961  | + | Target "Motif:TcVIPER" 1801 1858 |
| 2  | 476229  | 476444  | + | Target "Motif:TcVIPER" 4177 4388 |
| 2  | 641989  | 642056  | + | Target "Motif:TcVIPER" 4326 4389 |
| 2  | 652628  | 652695  | - | Target "Motif:TcVIPER" 4326 4389 |
| 2  | 903393  | 906241  | - | Target "Motif:TcVIPER" 1372 4221 |

|    |         |         |   |                                  |
|----|---------|---------|---|----------------------------------|
| 2  | 906255  | 906761  | - | Target "Motif:TcVIPER" 819 1300  |
| 2  | 906845  | 907481  | - | Target "Motif:TcVIPER" 2 634     |
| 2  | 998505  | 1002944 | + | Target "Motif:TcVIPER" 27 4390   |
| 2  | 998505  | 1002944 | + | Target "Motif:TcVIPER" 27 4390   |
| 2  | 998505  | 1002944 | + | Target "Motif:TcVIPER" 27 4390   |
| 2  | 1035844 | 1037408 | + | Target "Motif:TcVIPER" 19 1525   |
| 2  | 1037399 | 1039751 | + | Target "Motif:TcVIPER" 1864 4223 |
| 2  | 1098216 | 1098428 | + | Target "Motif:TcVIPER" 4185 4389 |
| 2  | 1128639 | 1128682 | + | Target "Motif:TcVIPER" 1 44      |
| 2  | 1128869 | 1133037 | + | Target "Motif:TcVIPER" 45 4389   |
| 2  | 1128869 | 1133037 | + | Target "Motif:TcVIPER" 45 4389   |
| 2  | 1290660 | 1291555 | + | Target "Motif:TcVIPER" 3441 4389 |
| 2  | 1409104 | 1412321 | - | Target "Motif:TcVIPER" 1074 4389 |
| 2  | 1433150 | 1433591 | - | Target "Motif:TcVIPER" 1 447     |
| 2  | 1437317 | 1441308 | - | Target "Motif:TcVIPER" 160 4209  |
| 2  | 1437317 | 1441308 | - | Target "Motif:TcVIPER" 160 4209  |
| 2  | 1437317 | 1441308 | - | Target "Motif:TcVIPER" 160 4209  |
| 2  | 1544550 | 1546490 | - | Target "Motif:TcVIPER" 1081 3063 |
| 2  | 1641223 | 1641657 | + | Target "Motif:TcVIPER" 4167 4390 |
| 2  | 1728704 | 1729542 | + | Target "Motif:TcVIPER" 1 806     |
| 2  | 1729591 | 1732997 | + | Target "Motif:TcVIPER" 823 4223  |
| 2  | 1729591 | 1732997 | + | Target "Motif:TcVIPER" 823 4223  |
| 20 | 213278  | 213410  | + | Target "Motif:TcVIPER" 452 586   |
| 20 | 213540  | 214054  | + | Target "Motif:TcVIPER" 819 1307  |
| 20 | 214068  | 216990  | + | Target "Motif:TcVIPER" 442 4270  |
| 20 | 214068  | 216990  | + | Target "Motif:TcVIPER" 442 4270  |
| 20 | 214068  | 216990  | + | Target "Motif:TcVIPER" 442 4270  |
| 20 | 214068  | 216990  | + | Target "Motif:TcVIPER" 442 4270  |
| 20 | 214068  | 216990  | + | Target "Motif:TcVIPER" 442 4270  |
| 20 | 214068  | 216990  | + | Target "Motif:TcVIPER" 442 4270  |
| 20 | 343094  | 343554  | - | Target "Motif:TcVIPER" 4167 4390 |
| 20 | 391806  | 391935  | + | Target "Motif:TcVIPER" 453 586   |
| 20 | 392066  | 392578  | + | Target "Motif:TcVIPER" 819 1307  |
| 20 | 392592  | 395077  | + | Target "Motif:TcVIPER" 1379 4028 |
| 20 | 392592  | 395077  | + | Target "Motif:TcVIPER" 1379 4028 |
| 20 | 392592  | 395077  | + | Target "Motif:TcVIPER" 1379 4028 |
| 20 | 392592  | 395077  | + | Target "Motif:TcVIPER" 1379 4028 |
| 20 | 392592  | 395077  | + | Target "Motif:TcVIPER" 1379 4028 |
| 20 | 542578  | 542707  | + | Target "Motif:TcVIPER" 457 586   |
| 20 | 542839  | 543353  | + | Target "Motif:TcVIPER" 819 1307  |
| 20 | 542839  | 543353  | + | Target "Motif:TcVIPER" 819 1307  |
| 20 | 543367  | 546285  | + | Target "Motif:TcVIPER" 442 4270  |
| 20 | 543367  | 546285  | + | Target "Motif:TcVIPER" 442 4270  |
| 20 | 543367  | 546285  | + | Target "Motif:TcVIPER" 442 4270  |
| 20 | 726165  | 726494  | + | Target "Motif:TcVIPER" 4177 4389 |
| 21 | 123791  | 128151  | - | Target "Motif:TcVIPER" 1 4390    |

|    |        |        |   |                                  |
|----|--------|--------|---|----------------------------------|
| 21 | 141114 | 142612 | - | Target "Motif:TcVIPER" 2884 4389 |
| 21 | 145990 | 150340 | + | Target "Motif:TcVIPER" 1 4389    |
| 21 | 145990 | 150340 | + | Target "Motif:TcVIPER" 1 4389    |
| 21 | 145990 | 150340 | + | Target "Motif:TcVIPER" 1 4389    |
| 21 | 145990 | 150340 | + | Target "Motif:TcVIPER" 1 4389    |
| 22 | 4811   | 5348   | + | Target "Motif:TcVIPER" 1 534     |
| 22 | 13342  | 13784  | + | Target "Motif:TcVIPER" 4167 4389 |
| 22 | 13784  | 14339  | + | Target "Motif:TcVIPER" 127 692   |
| 22 | 14566  | 17865  | + | Target "Motif:TcVIPER" 917 4242  |
| 23 | 53141  | 56059  | - | Target "Motif:TcVIPER" 1372 4389 |
| 23 | 56072  | 56582  | - | Target "Motif:TcVIPER" 808 1297  |
| 23 | 56667  | 57061  | - | Target "Motif:TcVIPER" 225 620   |
| 23 | 139629 | 140219 | + | Target "Motif:TcVIPER" 52 620    |
| 23 | 140317 | 140820 | + | Target "Motif:TcVIPER" 819 1300  |
| 23 | 140834 | 142596 | + | Target "Motif:TcVIPER" 1372 3146 |
| 23 | 267582 | 268125 | + | Target "Motif:TcVIPER" 66 594    |
| 23 | 268362 | 268745 | + | Target "Motif:TcVIPER" 917 1300  |
| 23 | 275812 | 276400 | + | Target "Motif:TcVIPER" 52 620    |
| 23 | 276613 | 276996 | + | Target "Motif:TcVIPER" 917 1300  |
| 23 | 277010 | 279912 | + | Target "Motif:TcVIPER" 1372 4389 |
| 23 | 277010 | 279912 | + | Target "Motif:TcVIPER" 1372 4389 |
| 23 | 277010 | 279912 | + | Target "Motif:TcVIPER" 1372 4389 |
| 23 | 277010 | 279912 | + | Target "Motif:TcVIPER" 1372 4389 |
| 23 | 277010 | 279912 | + | Target "Motif:TcVIPER" 1372 4389 |
| 23 | 277010 | 279912 | + | Target "Motif:TcVIPER" 1372 4389 |
| 23 | 277010 | 279912 | + | Target "Motif:TcVIPER" 1372 4389 |
| 23 | 277010 | 279912 | + | Target "Motif:TcVIPER" 1372 4389 |
| 23 | 277010 | 279912 | + | Target "Motif:TcVIPER" 1372 4389 |
| 23 | 661634 | 663936 | + | Target "Motif:TcVIPER" 2040 4390 |
| 23 | 688606 | 692938 | + | Target "Motif:TcVIPER" 1 4390    |
| 23 | 688606 | 692938 | + | Target "Motif:TcVIPER" 1 4390    |
| 23 | 688606 | 692938 | + | Target "Motif:TcVIPER" 1 4390    |
| 23 | 688606 | 692938 | + | Target "Motif:TcVIPER" 1 4390    |
| 23 | 688606 | 692938 | + | Target "Motif:TcVIPER" 1 4390    |
| 23 | 688606 | 692938 | + | Target "Motif:TcVIPER" 1 4390    |
| 23 | 688606 | 692938 | + | Target "Motif:TcVIPER" 1 4390    |
| 23 | 688606 | 692938 | + | Target "Motif:TcVIPER" 1 4390    |
| 23 | 696598 | 696809 | + | Target "Motif:TcVIPER" 4185 4385 |
| 24 | 71818  | 76166  | - | Target "Motif:TcVIPER" 1 4390    |
| 24 | 71818  | 76166  | - | Target "Motif:TcVIPER" 1 4390    |
| 24 | 109376 | 109446 | - | Target "Motif:TcVIPER" 4323 4389 |
| 24 | 259405 | 260088 | - | Target "Motif:TcVIPER" 3683 4378 |
| 24 | 281283 | 281969 | - | Target "Motif:TcVIPER" 3688 4379 |
| 24 | 325428 | 325498 | + | Target "Motif:TcVIPER" 4323 4389 |
| 24 | 387638 | 387709 | + | Target "Motif:TcVIPER" 4321 4389 |
| 24 | 464964 | 465034 | - | Target "Motif:TcVIPER" 4323 4389 |
| 24 | 489881 | 490141 | - | Target "Motif:TcVIPER" 1372 1634 |
| 24 | 490153 | 490653 | - | Target "Motif:TcVIPER" 819 1300  |
| 24 | 490750 | 491196 | - | Target "Motif:TcVIPER" 162 620   |



|    |        |        |   |                                  |
|----|--------|--------|---|----------------------------------|
| 24 | 602561 | 603093 | - | Target "Motif:TcVIPER" 5 532     |
| 24 | 679125 | 679365 | + | Target "Motif:TcVIPER" 4179 4389 |
| 24 | 686693 | 687133 | + | Target "Motif:TcVIPER" 4167 4389 |
| 24 | 687141 | 688681 | + | Target "Motif:TcVIPER" 27 1525   |
| 24 | 688672 | 690995 | + | Target "Motif:TcVIPER" 717 4209  |
| 24 | 688672 | 690995 | + | Target "Motif:TcVIPER" 717 4209  |
| 24 | 691033 | 691103 | + | Target "Motif:TcVIPER" 767 838   |
| 24 | 692066 | 692511 | + | Target "Motif:TcVIPER" 4167 4389 |
| 25 | 0      | 2859   | - | Target "Motif:TcVIPER" 1 2942    |
| 25 | 0      | 2859   | - | Target "Motif:TcVIPER" 1 2942    |
| 25 | 0      | 2859   | - | Target "Motif:TcVIPER" 1 2942    |
| 25 | 0      | 2859   | - | Target "Motif:TcVIPER" 1 2942    |
| 25 | 0      | 2859   | - | Target "Motif:TcVIPER" 1 2942    |
| 25 | 227384 | 230727 | - | Target "Motif:TcVIPER" 914 4386  |
| 25 | 230800 | 231438 | - | Target "Motif:TcVIPER" 7 750     |
| 25 | 674297 | 677568 | - | Target "Motif:TcVIPER" 914 4386  |
| 25 | 677656 | 678278 | - | Target "Motif:TcVIPER" 7 692     |
| 25 | 680399 | 681115 | + | Target "Motif:TcVIPER" 7 692     |
| 25 | 680493 | 680536 | + | Target "Motif:TcVIPER" 511 683   |
| 25 | 681204 | 684533 | + | Target "Motif:TcVIPER" 914 4386  |
| 25 | 681204 | 684533 | + | Target "Motif:TcVIPER" 914 4386  |
| 26 | 152173 | 156176 | + | Target "Motif:TcVIPER" 1 4024    |
| 26 | 551036 | 551393 | + | Target "Motif:TcVIPER" 4177 4389 |
| 26 | 558767 | 559203 | + | Target "Motif:TcVIPER" 4167 4389 |
| 26 | 559203 | 563344 | + | Target "Motif:TcVIPER" 19 4223   |
| 26 | 668267 | 668717 | + | Target "Motif:TcVIPER" 4167 4390 |
| 27 | 1188   | 1245   | - | Target "Motif:TcVIPER" 4335 4390 |
| 27 | 1621   | 2245   | + | Target "Motif:TcVIPER" 5 630     |
| 27 | 2254   | 5796   | + | Target "Motif:TcVIPER" 717 4241  |
| 27 | 2254   | 5796   | + | Target "Motif:TcVIPER" 717 4241  |
| 27 | 2254   | 5796   | + | Target "Motif:TcVIPER" 717 4241  |
| 27 | 10415  | 10472  | - | Target "Motif:TcVIPER" 4335 4390 |
| 27 | 10858  | 11494  | + | Target "Motif:TcVIPER" 5 630     |
| 27 | 11503  | 15178  | + | Target "Motif:TcVIPER" 762 4390  |
| 27 | 11503  | 15178  | + | Target "Motif:TcVIPER" 762 4390  |
| 27 | 183325 | 183395 | - | Target "Motif:TcVIPER" 4325 4390 |
| 27 | 187869 | 187939 | - | Target "Motif:TcVIPER" 4325 4390 |
| 27 | 304575 | 305024 | - | Target "Motif:TcVIPER" 4167 4390 |
| 27 | 443107 | 443557 | + | Target "Motif:TcVIPER" 4167 4388 |
| 27 | 488542 | 489008 | + | Target "Motif:TcVIPER" 4167 4390 |
| 27 | 509918 | 510341 | + | Target "Motif:TcVIPER" 4177 4389 |
| 27 | 537005 | 537219 | + | Target "Motif:TcVIPER" 4177 4389 |
| 28 | 312786 | 312823 | + | Target "Motif:TcVIPER" 1 40      |
| 28 | 312997 | 314176 | + | Target "Motif:TcVIPER" 41 1326   |
| 28 | 312997 | 314176 | + | Target "Motif:TcVIPER" 41 1326   |
| 28 | 314168 | 316390 | + | Target "Motif:TcVIPER" 1964 4224 |

|    |         |         |   |                                  |
|----|---------|---------|---|----------------------------------|
| 28 | 386111  | 386140  | + | Target "Motif:TcVIPER" 1 32      |
| 28 | 386317  | 387474  | + | Target "Motif:TcVIPER" 33 1325   |
| 28 | 387467  | 389848  | + | Target "Motif:TcVIPER" 1964 4390 |
| 28 | 427322  | 428048  | + | Target "Motif:TcVIPER" 5 762     |
| 28 | 428319  | 429293  | + | Target "Motif:TcVIPER" 1003 1973 |
| 29 | 123419  | 123863  | + | Target "Motif:TcVIPER" 4167 4390 |
| 29 | 123863  | 125540  | + | Target "Motif:TcVIPER" 138 1810  |
| 29 | 125537  | 127985  | + | Target "Motif:TcVIPER" 1928 4390 |
| 29 | 136578  | 138120  | + | Target "Motif:TcVIPER" 277 1810  |
| 29 | 138115  | 140560  | + | Target "Motif:TcVIPER" 1926 4390 |
| 29 | 138115  | 140560  | + | Target "Motif:TcVIPER" 1926 4390 |
| 29 | 141365  | 141807  | + | Target "Motif:TcVIPER" 4167 4390 |
| 29 | 141807  | 143483  | + | Target "Motif:TcVIPER" 138 1810  |
| 29 | 141807  | 143483  | + | Target "Motif:TcVIPER" 138 1810  |
| 29 | 141807  | 143483  | + | Target "Motif:TcVIPER" 138 1810  |
| 29 | 143480  | 145926  | + | Target "Motif:TcVIPER" 1928 4390 |
| 29 | 143480  | 145926  | + | Target "Motif:TcVIPER" 1928 4390 |
| 29 | 147164  | 148703  | + | Target "Motif:TcVIPER" 277 1810  |
| 29 | 148698  | 151145  | + | Target "Motif:TcVIPER" 1926 4390 |
| 29 | 151950  | 152395  | + | Target "Motif:TcVIPER" 4167 4390 |
| 29 | 152395  | 154069  | + | Target "Motif:TcVIPER" 138 1810  |
| 29 | 154064  | 156496  | + | Target "Motif:TcVIPER" 1926 4390 |
| 29 | 302629  | 307003  | + | Target "Motif:TcVIPER" 17 4389   |
| 29 | 315883  | 320262  | - | Target "Motif:TcVIPER" 17 4389   |
| 29 | 315883  | 320262  | - | Target "Motif:TcVIPER" 17 4389   |
| 29 | 395405  | 395617  | + | Target "Motif:TcVIPER" 4179 4389 |
| 29 | 497365  | 497515  | + | Target "Motif:TcVIPER" 477 626   |
| 29 | 503480  | 507831  | - | Target "Motif:TcVIPER" 2 4388    |
| 29 | 509499  | 513847  | + | Target "Motif:TcVIPER" 1 4388    |
| 3  | 10      | 991     | - | Target "Motif:TcVIPER" 20 979    |
| 3  | 8811    | 9023    | - | Target "Motif:TcVIPER" 4177 4389 |
| 3  | 34771   | 39019   | - | Target "Motif:TcVIPER" 19 4223   |
| 3  | 34771   | 39019   | - | Target "Motif:TcVIPER" 19 4223   |
| 3  | 34771   | 39019   | - | Target "Motif:TcVIPER" 19 4223   |
| 3  | 34771   | 39019   | - | Target "Motif:TcVIPER" 19 4223   |
| 3  | 34771   | 39019   | - | Target "Motif:TcVIPER" 19 4223   |
| 3  | 41497   | 41563   | - | Target "Motif:TcVIPER" 4333 4390 |
| 3  | 70095   | 70561   | - | Target "Motif:TcVIPER" 4167 4390 |
| 3  | 645341  | 646117  | - | Target "Motif:TcVIPER" 10 800    |
| 3  | 669654  | 669721  | - | Target "Motif:TcVIPER" 4326 4389 |
| 3  | 685477  | 687126  | - | Target "Motif:TcVIPER" 1498 3146 |
| 3  | 685477  | 687126  | - | Target "Motif:TcVIPER" 1498 3146 |
| 3  | 685477  | 687126  | - | Target "Motif:TcVIPER" 1498 3146 |
| 3  | 685477  | 687126  | - | Target "Motif:TcVIPER" 1498 3146 |
| 3  | 687095  | 688461  | - | Target "Motif:TcVIPER" 10 1345   |
| 3  | 1072836 | 1073132 | + | Target "Motif:TcVIPER" 4167 4389 |

|    |         |         |   |                                  |
|----|---------|---------|---|----------------------------------|
| 3  | 1629513 | 1633780 | + | Target "Motif:TcVIPER" 1 4267    |
| 3  | 1629513 | 1633780 | + | Target "Motif:TcVIPER" 1 4267    |
| 30 | 146542  | 146620  | - | Target "Motif:TcVIPER" 4320 4390 |
| 30 | 259395  | 259473  | + | Target "Motif:TcVIPER" 4320 4390 |
| 30 | 465769  | 466453  | - | Target "Motif:TcVIPER" 3689 4379 |
| 30 | 491631  | 492316  | + | Target "Motif:TcVIPER" 3689 4379 |
| 30 | 515478  | 517144  | + | Target "Motif:TcVIPER" 2694 4389 |
| 31 | 287543  | 288172  | + | Target "Motif:TcVIPER" 20 630    |
| 31 | 288379  | 288645  | + | Target "Motif:TcVIPER" 918 1178  |
| 31 | 292922  | 293549  | + | Target "Motif:TcVIPER" 20 630    |
| 31 | 293638  | 297081  | + | Target "Motif:TcVIPER" 717 4240  |
| 31 | 293638  | 297081  | + | Target "Motif:TcVIPER" 717 4240  |
| 31 | 293638  | 297081  | + | Target "Motif:TcVIPER" 717 4240  |
| 31 | 293638  | 297081  | + | Target "Motif:TcVIPER" 717 4240  |
| 31 | 297146  | 297212  | + | Target "Motif:TcVIPER" 4326 4389 |
| 31 | 303950  | 304568  | + | Target "Motif:TcVIPER" 20 630    |
| 31 | 304657  | 308085  | + | Target "Motif:TcVIPER" 717 4240  |
| 31 | 304657  | 308085  | + | Target "Motif:TcVIPER" 717 4240  |
| 31 | 304657  | 308085  | + | Target "Motif:TcVIPER" 717 4240  |
| 31 | 304657  | 308085  | + | Target "Motif:TcVIPER" 717 4240  |
| 31 | 308150  | 308216  | + | Target "Motif:TcVIPER" 4326 4389 |
| 31 | 315028  | 315655  | + | Target "Motif:TcVIPER" 20 630    |
| 31 | 315707  | 316397  | + | Target "Motif:TcVIPER" 770 1491  |
| 31 | 316475  | 319125  | + | Target "Motif:TcVIPER" 717 4240  |
| 31 | 319190  | 319257  | + | Target "Motif:TcVIPER" 4326 4389 |
| 31 | 446546  | 446612  | + | Target "Motif:TcVIPER" 4326 4389 |
| 32 | 13819   | 14398   | + | Target "Motif:TcVIPER" 5 679     |
| 32 | 21417   | 21879   | + | Target "Motif:TcVIPER" 400 913   |
| 32 | 327219  | 329315  | - | Target "Motif:TcVIPER" 2226 4389 |
| 32 | 334152  | 337407  | - | Target "Motif:TcVIPER" 1074 4389 |
| 32 | 381362  | 385565  | - | Target "Motif:TcVIPER" 47 4390   |
| 32 | 385755  | 385798  | - | Target "Motif:TcVIPER" 1 46      |
| 32 | 441238  | 445451  | - | Target "Motif:TcVIPER" 96 4223   |
| 32 | 441238  | 445451  | - | Target "Motif:TcVIPER" 96 4223   |
| 32 | 468206  | 468655  | - | Target "Motif:TcVIPER" 4167 4390 |
| 32 | 609068  | 609096  | - | Target "Motif:TcVIPER" 4361 4389 |
| 32 | 609485  | 613700  | - | Target "Motif:TcVIPER" 1 4147    |
| 32 | 609485  | 613700  | - | Target "Motif:TcVIPER" 1 4147    |
| 32 | 609485  | 613700  | - | Target "Motif:TcVIPER" 1 4147    |
| 32 | 609485  | 613700  | - | Target "Motif:TcVIPER" 1 4147    |
| 32 | 648811  | 653062  | + | Target "Motif:TcVIPER" 123 4389  |
| 32 | 648811  | 653062  | + | Target "Motif:TcVIPER" 123 4389  |
| 32 | 658345  | 659792  | + | Target "Motif:TcVIPER" 2914 4389 |
| 32 | 665091  | 666542  | + | Target "Motif:TcVIPER" 2914 4383 |
| 32 | 806144  | 806442  | + | Target "Motif:TcVIPER" 230 612   |
| 32 | 806512  | 807065  | + | Target "Motif:TcVIPER" 770 1300  |

|    |        |        |   |                                  |
|----|--------|--------|---|----------------------------------|
| 32 | 807084 | 809895 | + | Target "Motif:TcVIPER" 1381 4185 |
| 32 | 809964 | 810033 | + | Target "Motif:TcVIPER" 4320 4389 |
| 32 | 982530 | 983977 | + | Target "Motif:TcVIPER" 2914 4383 |
| 33 | 209000 | 213143 | - | Target "Motif:TcVIPER" 1 4156    |
| 33 | 209000 | 213143 | - | Target "Motif:TcVIPER" 1 4156    |
| 33 | 209000 | 213143 | - | Target "Motif:TcVIPER" 1 4156    |
| 33 | 209000 | 213143 | - | Target "Motif:TcVIPER" 1 4156    |
| 33 | 209000 | 213143 | - | Target "Motif:TcVIPER" 1 4156    |
| 33 | 264841 | 268987 | + | Target "Motif:TcVIPER" 1 4156    |
| 33 | 264841 | 268987 | + | Target "Motif:TcVIPER" 1 4156    |
| 33 | 264841 | 268987 | + | Target "Motif:TcVIPER" 1 4156    |
| 33 | 264841 | 268987 | + | Target "Motif:TcVIPER" 1 4156    |
| 33 | 264841 | 268987 | + | Target "Motif:TcVIPER" 1 4156    |
| 33 | 269229 | 269612 | - | Target "Motif:TcVIPER" 4167 4390 |
| 33 | 269614 | 270038 | - | Target "Motif:TcVIPER" 4167 4390 |
| 33 | 288637 | 289128 | - | Target "Motif:TcVIPER" 4167 4390 |
| 33 | 472229 | 475362 | + | Target "Motif:TcVIPER" 1074 4221 |
| 33 | 472229 | 475362 | + | Target "Motif:TcVIPER" 1074 4221 |
| 34 | 167924 | 172352 | - | Target "Motif:TcVIPER" 5 4267    |
| 34 | 167924 | 172352 | - | Target "Motif:TcVIPER" 5 4267    |
| 34 | 167924 | 172352 | - | Target "Motif:TcVIPER" 5 4267    |
| 34 | 167924 | 172352 | - | Target "Motif:TcVIPER" 5 4267    |
| 34 | 167924 | 172352 | - | Target "Motif:TcVIPER" 5 4267    |
| 34 | 167924 | 172352 | - | Target "Motif:TcVIPER" 5 4267    |
| 34 | 247895 | 250417 | - | Target "Motif:TcVIPER" 1846 4386 |
| 34 | 415556 | 419869 | + | Target "Motif:TcVIPER" 12 4390   |
| 34 | 415556 | 419869 | + | Target "Motif:TcVIPER" 12 4390   |
| 34 | 415556 | 419869 | + | Target "Motif:TcVIPER" 12 4390   |
| 34 | 415556 | 419869 | + | Target "Motif:TcVIPER" 12 4390   |
| 34 | 415556 | 419869 | + | Target "Motif:TcVIPER" 12 4390   |
| 34 | 486337 | 486767 | + | Target "Motif:TcVIPER" 4167 4389 |
| 35 | 58290  | 58357  | + | Target "Motif:TcVIPER" 4326 4389 |
| 35 | 77914  | 77981  | + | Target "Motif:TcVIPER" 4326 4389 |
| 35 | 121336 | 121773 | - | Target "Motif:TcVIPER" 4167 4389 |
| 35 | 161675 | 162718 | - | Target "Motif:TcVIPER" 3336 4389 |
| 35 | 167505 | 169466 | - | Target "Motif:TcVIPER" 1372 3347 |
| 35 | 169480 | 169864 | - | Target "Motif:TcVIPER" 917 1300  |
| 35 | 170078 | 170518 | - | Target "Motif:TcVIPER" 162 620   |
| 35 | 184052 | 185214 | - | Target "Motif:TcVIPER" 3212 4389 |
| 35 | 191989 | 192275 | - | Target "Motif:TcVIPER" 1372 1666 |
| 35 | 192289 | 192667 | - | Target "Motif:TcVIPER" 917 1300  |
| 35 | 192877 | 193455 | - | Target "Motif:TcVIPER" 52 620    |
| 35 | 381560 | 382773 | - | Target "Motif:TcVIPER" 2972 4210 |
| 35 | 383032 | 386008 | - | Target "Motif:TcVIPER" 1 2988    |
| 35 | 383032 | 386008 | - | Target "Motif:TcVIPER" 1 2988    |
| 35 | 390048 | 390118 | - | Target "Motif:TcVIPER" 4323 4389 |

|    |        |        |   |                                  |
|----|--------|--------|---|----------------------------------|
| 35 | 390254 | 391466 | - | Target "Motif:TcVIPER" 2972 4210 |
| 35 | 391726 | 394704 | - | Target "Motif:TcVIPER" 1 2988    |
| 35 | 391726 | 394704 | - | Target "Motif:TcVIPER" 1 2988    |
| 35 | 391726 | 394704 | - | Target "Motif:TcVIPER" 1 2988    |
| 35 | 391726 | 394704 | - | Target "Motif:TcVIPER" 1 2988    |
| 35 | 397772 | 400751 | + | Target "Motif:TcVIPER" 1 2988    |
| 35 | 397772 | 400751 | + | Target "Motif:TcVIPER" 1 2988    |
| 35 | 397772 | 400751 | + | Target "Motif:TcVIPER" 1 2988    |
| 35 | 401009 | 402222 | + | Target "Motif:TcVIPER" 2972 4210 |
| 35 | 402356 | 402426 | + | Target "Motif:TcVIPER" 4323 4389 |
| 35 | 505416 | 505497 | - | Target "Motif:TcVIPER" 4323 4389 |
| 35 | 505646 | 506864 | - | Target "Motif:TcVIPER" 2972 4214 |
| 35 | 507122 | 510103 | - | Target "Motif:TcVIPER" 1 2988    |
| 35 | 507122 | 510103 | - | Target "Motif:TcVIPER" 1 2988    |
| 35 | 513171 | 516155 | + | Target "Motif:TcVIPER" 1 2988    |
| 35 | 516415 | 517632 | + | Target "Motif:TcVIPER" 2972 4214 |
| 36 | 40228  | 40554  | - | Target "Motif:TcVIPER" 4177 4389 |
| 36 | 299827 | 299977 | - | Target "Motif:TcVIPER" 477 626   |
| 36 | 311812 | 314020 | - | Target "Motif:TcVIPER" 444 4389  |
| 36 | 314010 | 315494 | - | Target "Motif:TcVIPER" 718 2176  |
| 36 | 315582 | 316164 | - | Target "Motif:TcVIPER" 50 620    |
| 36 | 435226 | 435675 | + | Target "Motif:TcVIPER" 4167 4390 |
| 37 | 33129  | 33279  | + | Target "Motif:TcVIPER" 477 626   |
| 37 | 38574  | 38707  | - | Target "Motif:TcVIPER" 644 778   |
| 37 | 38653  | 41862  | - | Target "Motif:TcVIPER" 922 4221  |
| 37 | 42202  | 42828  | - | Target "Motif:TcVIPER" 2 620     |
| 37 | 44495  | 48673  | + | Target "Motif:TcVIPER" 1 4233    |
| 37 | 44495  | 48673  | + | Target "Motif:TcVIPER" 1 4233    |
| 37 | 44495  | 48673  | + | Target "Motif:TcVIPER" 1 4233    |
| 37 | 51291  | 54001  | + | Target "Motif:TcVIPER" 644 4241  |
| 37 | 61206  | 64083  | + | Target "Motif:TcVIPER" 1512 4390 |
| 37 | 75947  | 76454  | + | Target "Motif:TcVIPER" 19 705    |
| 37 | 76545  | 78710  | + | Target "Motif:TcVIPER" 816 2984  |
| 37 | 92699  | 93335  | + | Target "Motif:TcVIPER" 5 630     |
| 37 | 93344  | 96919  | + | Target "Motif:TcVIPER" 717 4224  |
| 37 | 100349 | 102675 | + | Target "Motif:TcVIPER" 1877 4224 |
| 37 | 124546 | 125178 | + | Target "Motif:TcVIPER" 5 630     |
| 37 | 125187 | 128758 | + | Target "Motif:TcVIPER" 717 4224  |
| 37 | 125187 | 128758 | + | Target "Motif:TcVIPER" 717 4224  |
| 37 | 191829 | 191869 | + | Target "Motif:TcVIPER" 3 42      |
| 37 | 192039 | 196209 | + | Target "Motif:TcVIPER" 43 4233   |
| 37 | 204651 | 205246 | + | Target "Motif:TcVIPER" 5 589     |
| 37 | 205294 | 208953 | + | Target "Motif:TcVIPER" 485 4233  |
| 37 | 256698 | 260919 | - | Target "Motif:TcVIPER" 5 4233    |
| 37 | 274138 | 277815 | - | Target "Motif:TcVIPER" 485 4233  |
| 37 | 274138 | 277815 | - | Target "Motif:TcVIPER" 485 4233  |

|    |        |        |   |                                  |
|----|--------|--------|---|----------------------------------|
| 37 | 277824 | 278465 | - | Target "Motif:TcVIPER" 5 630     |
| 37 | 311002 | 311070 | - | Target "Motif:TcVIPER" 4326 4390 |
| 37 | 328495 | 329136 | + | Target "Motif:TcVIPER" 5 630     |
| 37 | 329145 | 332700 | + | Target "Motif:TcVIPER" 717 4233  |
| 37 | 341489 | 341556 | - | Target "Motif:TcVIPER" 4326 4389 |
| 37 | 359285 | 359353 | + | Target "Motif:TcVIPER" 4326 4390 |
| 37 | 361528 | 365795 | + | Target "Motif:TcVIPER" 3 4224    |
| 37 | 361528 | 365795 | + | Target "Motif:TcVIPER" 3 4224    |
| 37 | 361528 | 365795 | + | Target "Motif:TcVIPER" 3 4224    |
| 37 | 361528 | 365795 | + | Target "Motif:TcVIPER" 3 4224    |
| 37 | 361528 | 365795 | + | Target "Motif:TcVIPER" 3 4224    |
| 37 | 361528 | 365795 | + | Target "Motif:TcVIPER" 3 4224    |
| 37 | 361528 | 365795 | + | Target "Motif:TcVIPER" 3 4224    |
| 37 | 365861 | 365929 | + | Target "Motif:TcVIPER" 4326 4390 |
| 38 | 21273  | 25693  | - | Target "Motif:TcVIPER" 2 4389    |
| 38 | 42541  | 46909  | - | Target "Motif:TcVIPER" 60 4389   |
| 38 | 48971  | 52223  | - | Target "Motif:TcVIPER" 60 3290   |
| 38 | 48971  | 52223  | - | Target "Motif:TcVIPER" 60 3290   |
| 38 | 48971  | 52223  | - | Target "Motif:TcVIPER" 60 3290   |
| 38 | 306185 | 306919 | + | Target "Motif:TcVIPER" 60 806    |
| 38 | 306185 | 306919 | + | Target "Motif:TcVIPER" 60 806    |
| 38 | 306960 | 310557 | + | Target "Motif:TcVIPER" 814 4389  |
| 38 | 306960 | 310557 | + | Target "Motif:TcVIPER" 814 4389  |
| 38 | 306960 | 310557 | + | Target "Motif:TcVIPER" 814 4389  |
| 38 | 419991 | 424160 | + | Target "Motif:TcVIPER" 14 4209   |
| 38 | 432668 | 432733 | + | Target "Motif:TcVIPER" 4210 4274 |
| 39 | 150164 | 153473 | + | Target "Motif:TcVIPER" 1074 4388 |
| 39 | 150164 | 153473 | + | Target "Motif:TcVIPER" 1074 4388 |
| 39 | 150164 | 153473 | + | Target "Motif:TcVIPER" 1074 4388 |
| 39 | 150164 | 153473 | + | Target "Motif:TcVIPER" 1074 4388 |
| 39 | 150164 | 153473 | + | Target "Motif:TcVIPER" 1074 4388 |
| 4  | 32231  | 32299  | + | Target "Motif:TcVIPER" 4170 4237 |
| 4  | 46272  | 46677  | + | Target "Motif:TcVIPER" 4167 4237 |
| 4  | 70389  | 70864  | + | Target "Motif:TcVIPER" 4167 4237 |
| 4  | 179843 | 180309 | + | Target "Motif:TcVIPER" 4167 4237 |
| 4  | 355698 | 355770 | + | Target "Motif:TcVIPER" 4167 4233 |
| 4  | 572538 | 572970 | + | Target "Motif:TcVIPER" 4167 4388 |
| 4  | 573012 | 577385 | + | Target "Motif:TcVIPER" 1 4390    |
| 4  | 573012 | 577385 | + | Target "Motif:TcVIPER" 1 4390    |
| 4  | 573012 | 577385 | + | Target "Motif:TcVIPER" 1 4390    |
| 4  | 594198 | 594250 | + | Target "Motif:TcVIPER" 1 54      |
| 4  | 594427 | 598579 | + | Target "Motif:TcVIPER" 55 4389   |
| 4  | 637499 | 637972 | + | Target "Motif:TcVIPER" 4167 4237 |
| 4  | 646122 | 646193 | + | Target "Motif:TcVIPER" 4167 4237 |
| 4  | 660583 | 660656 | + | Target "Motif:TcVIPER" 4167 4237 |
| 4  | 667868 | 668185 | + | Target "Motif:TcVIPER" 4170 4237 |

|    |         |         |   |                                  |
|----|---------|---------|---|----------------------------------|
| 4  | 688967  | 689289  | + | Target "Motif:TcVIPER" 4167 4237 |
| 4  | 703068  | 703441  | + | Target "Motif:TcVIPER" 4167 4237 |
| 4  | 780184  | 784554  | + | Target "Motif:TcVIPER" 1 4390    |
| 4  | 780184  | 784554  | + | Target "Motif:TcVIPER" 1 4390    |
| 4  | 780184  | 784554  | + | Target "Motif:TcVIPER" 1 4390    |
| 4  | 791035  | 791465  | - | Target "Motif:TcVIPER" 4172 4389 |
| 4  | 816787  | 816858  | + | Target "Motif:TcVIPER" 4321 4389 |
| 4  | 837549  | 837620  | - | Target "Motif:TcVIPER" 4321 4389 |
| 4  | 864590  | 864661  | - | Target "Motif:TcVIPER" 4321 4389 |
| 4  | 882487  | 882558  | - | Target "Motif:TcVIPER" 4321 4389 |
| 4  | 898575  | 898646  | - | Target "Motif:TcVIPER" 4321 4389 |
| 4  | 1467982 | 1472360 | + | Target "Motif:TcVIPER" 1 4389    |
| 4  | 1467982 | 1472360 | + | Target "Motif:TcVIPER" 1 4389    |
| 4  | 1467982 | 1472360 | + | Target "Motif:TcVIPER" 1 4389    |
| 40 | 79229   | 80655   | - | Target "Motif:TcVIPER" 2914 4233 |
| 40 | 246811  | 251181  | - | Target "Motif:TcVIPER" 1 4390    |
| 40 | 309658  | 311093  | - | Target "Motif:TcVIPER" 2914 4233 |
| 40 | 342201  | 343634  | + | Target "Motif:TcVIPER" 2914 4233 |
| 40 | 342201  | 343634  | + | Target "Motif:TcVIPER" 2914 4233 |
| 41 | 277537  | 277552  | + | Target "Motif:TcVIPER" 4345 4390 |
| 41 | 424822  | 425254  | - | Target "Motif:TcVIPER" 3769 4226 |
| 41 | 425247  | 428253  | - | Target "Motif:TcVIPER" 98 3102   |
| 42 | 30497   | 30564   | - | Target "Motif:TcVIPER" 4326 4389 |
| 42 | 36928   | 36995   | - | Target "Motif:TcVIPER" 4326 4389 |
| 42 | 138708  | 138921  | - | Target "Motif:TcVIPER" 4177 4389 |
| 42 | 145192  | 145406  | - | Target "Motif:TcVIPER" 4177 4389 |
| 42 | 160773  | 161679  | - | Target "Motif:TcVIPER" 3291 4221 |
| 42 | 383713  | 388144  | - | Target "Motif:TcVIPER" 7 4390    |
| 42 | 435285  | 438631  | + | Target "Motif:TcVIPER" 68 3347   |
| 42 | 435285  | 438631  | + | Target "Motif:TcVIPER" 68 3347   |
| 42 | 435285  | 438631  | + | Target "Motif:TcVIPER" 68 3347   |
| 42 | 714616  | 714845  | + | Target "Motif:TcVIPER" 4167 4387 |
| 42 | 727690  | 727726  | + | Target "Motif:TcVIPER" 471 683   |
| 42 | 727931  | 728197  | + | Target "Motif:TcVIPER" 4193 4387 |
| 42 | 827405  | 831865  | + | Target "Motif:TcVIPER" 1 4387    |
| 42 | 827405  | 831865  | + | Target "Motif:TcVIPER" 1 4387    |
| 42 | 827405  | 831865  | + | Target "Motif:TcVIPER" 1 4387    |
| 43 | 76614   | 76695   | + | Target "Motif:TcVIPER" 4319 4390 |
| 43 | 119149  | 123417  | - | Target "Motif:TcVIPER" 3 4262    |
| 44 | 10280   | 11193   | - | Target "Motif:TcVIPER" 3291 4221 |
| 44 | 15925   | 16494   | - | Target "Motif:TcVIPER" 2735 3304 |
| 44 | 16489   | 19160   | - | Target "Motif:TcVIPER" 1 2613    |
| 44 | 16489   | 19160   | - | Target "Motif:TcVIPER" 1 2613    |
| 44 | 47364   | 48832   | - | Target "Motif:TcVIPER" 2735 4221 |
| 44 | 48827   | 51494   | - | Target "Motif:TcVIPER" 1 2613    |
| 44 | 48827   | 51494   | - | Target "Motif:TcVIPER" 1 2613    |

|    |        |        |   |                                  |
|----|--------|--------|---|----------------------------------|
| 44 | 91199  | 91278  | + | Target "Motif:TcVIPER" 4166 4240 |
| 44 | 93537  | 93979  | - | Target "Motif:TcVIPER" 4172 4390 |
| 44 | 153697 | 156272 | - | Target "Motif:TcVIPER" 770 3304  |
| 44 | 156324 | 157012 | - | Target "Motif:TcVIPER" 5 684     |
| 45 | 269753 | 269978 | - | Target "Motif:TcVIPER" 4167 4389 |
| 45 | 271012 | 271376 | - | Target "Motif:TcVIPER" 4167 4390 |
| 46 | 64154  | 67082  | - | Target "Motif:TcVIPER" 1372 4389 |
| 46 | 67096  | 67482  | - | Target "Motif:TcVIPER" 917 1300  |
| 46 | 67726  | 68277  | - | Target "Motif:TcVIPER" 52 594    |
| 46 | 181833 | 186012 | - | Target "Motif:TcVIPER" 1 4242    |
| 46 | 181833 | 186012 | - | Target "Motif:TcVIPER" 1 4242    |
| 46 | 224089 | 224630 | - | Target "Motif:TcVIPER" 1 534     |
| 46 | 351987 | 352205 | + | Target "Motif:TcVIPER" 4179 4389 |
| 46 | 357128 | 357557 | + | Target "Motif:TcVIPER" 4167 4389 |
| 46 | 357894 | 358296 | + | Target "Motif:TcVIPER" 4179 4389 |
| 47 | 189777 | 194136 | - | Target "Motif:TcVIPER" 1 4390    |
| 47 | 189777 | 194136 | - | Target "Motif:TcVIPER" 1 4390    |
| 47 | 194180 | 194614 | - | Target "Motif:TcVIPER" 4167 4388 |
| 47 | 201771 | 204808 | - | Target "Motif:TcVIPER" 1 3051    |
| 47 | 201771 | 204808 | - | Target "Motif:TcVIPER" 1 3051    |
| 47 | 201771 | 204808 | - | Target "Motif:TcVIPER" 1 3051    |
| 47 | 204851 | 205282 | - | Target "Motif:TcVIPER" 4167 4388 |
| 47 | 212435 | 216541 | - | Target "Motif:TcVIPER" 1 4135    |
| 47 | 212435 | 216541 | - | Target "Motif:TcVIPER" 1 4135    |
| 47 | 216584 | 217014 | - | Target "Motif:TcVIPER" 4167 4388 |
| 47 | 243864 | 245577 | - | Target "Motif:TcVIPER" 1 1730    |
| 47 | 245620 | 246050 | - | Target "Motif:TcVIPER" 4167 4388 |
| 47 | 365042 | 365505 | - | Target "Motif:TcVIPER" 4167 4237 |
| 47 | 394468 | 394693 | + | Target "Motif:TcVIPER" 4167 4389 |
| 5  | 104090 | 107641 | - | Target "Motif:TcVIPER" 816 4390  |
| 5  | 107728 | 108268 | - | Target "Motif:TcVIPER" 7 634     |
| 5  | 455698 | 456179 | + | Target "Motif:TcVIPER" 4167 4390 |
| 5  | 523113 | 527339 | - | Target "Motif:TcVIPER" 3 4262    |
| 5  | 765100 | 765322 | + | Target "Motif:TcVIPER" 4186 4388 |
| 5  | 765603 | 766227 | + | Target "Motif:TcVIPER" 16 634    |
| 5  | 766440 | 766816 | + | Target "Motif:TcVIPER" 929 1302  |
| 5  | 766839 | 769462 | + | Target "Motif:TcVIPER" 1383 4212 |
| 5  | 780104 | 780732 | + | Target "Motif:TcVIPER" 16 634    |
| 5  | 780823 | 781337 | + | Target "Motif:TcVIPER" 820 1302  |
| 5  | 781360 | 784014 | + | Target "Motif:TcVIPER" 1383 4220 |
| 5  | 787728 | 788351 | + | Target "Motif:TcVIPER" 16 634    |
| 5  | 788553 | 788953 | + | Target "Motif:TcVIPER" 916 1302  |
| 5  | 788974 | 791310 | + | Target "Motif:TcVIPER" 1383 3910 |
| 5  | 825684 | 826253 | + | Target "Motif:TcVIPER" 16 573    |
| 5  | 826530 | 826903 | + | Target "Motif:TcVIPER" 931 1302  |
| 5  | 827011 | 829568 | + | Target "Motif:TcVIPER" 1512 4220 |



|   |         |         |   |                                  |
|---|---------|---------|---|----------------------------------|
| 5 | 839286  | 839862  | + | Target "Motif:TcVIPER" 16 586    |
| 5 | 840139  | 840508  | + | Target "Motif:TcVIPER" 948 1302  |
| 5 | 840675  | 840967  | + | Target "Motif:TcVIPER" 1563 1855 |
| 5 | 840963  | 843159  | + | Target "Motif:TcVIPER" 1975 4220 |
| 5 | 845720  | 845973  | + | Target "Motif:TcVIPER" 368 620   |
| 5 | 846189  | 846574  | + | Target "Motif:TcVIPER" 916 1301  |
| 5 | 846682  | 849243  | + | Target "Motif:TcVIPER" 1512 4220 |
| 5 | 852960  | 853575  | + | Target "Motif:TcVIPER" 16 620    |
| 5 | 853792  | 854188  | + | Target "Motif:TcVIPER" 916 1302  |
| 5 | 854296  | 856557  | + | Target "Motif:TcVIPER" 1512 3910 |
| 5 | 1184566 | 1188796 | - | Target "Motif:TcVIPER" 25 4389   |
| 5 | 1188982 | 1189004 | - | Target "Motif:TcVIPER" 1 24      |
| 6 | 2572    | 2807    | - | Target "Motif:TcVIPER" 4191 4389 |
| 6 | 3024    | 3039    | - | Target "Motif:TcVIPER" 4177 4190 |
| 6 | 32803   | 33235   | - | Target "Motif:TcVIPER" 4167 4390 |
| 6 | 264382  | 268741  | - | Target "Motif:TcVIPER" 1 4390    |
| 6 | 297810  | 302143  | + | Target "Motif:TcVIPER" 1 4390    |
| 6 | 446453  | 449724  | + | Target "Motif:TcVIPER" 1074 4389 |
| 6 | 492398  | 496784  | - | Target "Motif:TcVIPER" 1 4390    |
| 6 | 492398  | 496784  | - | Target "Motif:TcVIPER" 1 4390    |
| 6 | 496828  | 497258  | - | Target "Motif:TcVIPER" 4167 4388 |
| 6 | 504185  | 506801  | - | Target "Motif:TcVIPER" 1 2628    |
| 6 | 504185  | 506801  | - | Target "Motif:TcVIPER" 1 2628    |
| 6 | 506843  | 507272  | - | Target "Motif:TcVIPER" 4167 4388 |
| 6 | 717784  | 717852  | - | Target "Motif:TcVIPER" 4172 4237 |
| 6 | 732516  | 732984  | - | Target "Motif:TcVIPER" 4167 4237 |
| 6 | 740183  | 740255  | - | Target "Motif:TcVIPER" 4170 4237 |
| 6 | 753885  | 754062  | - | Target "Motif:TcVIPER" 4167 4237 |
| 6 | 761461  | 761528  | - | Target "Motif:TcVIPER" 4173 4237 |
| 6 | 796498  | 796564  | - | Target "Motif:TcVIPER" 4173 4237 |
| 6 | 806141  | 806592  | - | Target "Motif:TcVIPER" 4167 4237 |
| 6 | 842185  | 846551  | - | Target "Motif:TcVIPER" 1 4389    |
| 6 | 931711  | 932154  | + | Target "Motif:TcVIPER" 4167 4389 |
| 6 | 1091235 | 1091694 | + | Target "Motif:TcVIPER" 4167 4390 |
| 6 | 1283757 | 1283965 | + | Target "Motif:TcVIPER" 4184 4389 |
| 7 | 13281   | 13740   | + | Target "Motif:TcVIPER" 4167 4390 |
| 7 | 102942  | 105097  | - | Target "Motif:TcVIPER" 717 4224  |
| 7 | 102942  | 105097  | - | Target "Motif:TcVIPER" 717 4224  |
| 7 | 107098  | 109653  | - | Target "Motif:TcVIPER" 1864 4390 |
| 7 | 109644  | 110258  | - | Target "Motif:TcVIPER" 919 1525  |
| 7 | 110419  | 111196  | - | Target "Motif:TcVIPER" 18 806    |
| 7 | 111196  | 111651  | - | Target "Motif:TcVIPER" 4167 4388 |
| 7 | 119080  | 119292  | - | Target "Motif:TcVIPER" 4179 4389 |
| 7 | 1115202 | 1115274 | + | Target "Motif:TcVIPER" 4323 4390 |
| 7 | 1174661 | 1174730 | + | Target "Motif:TcVIPER" 4323 4386 |
| 7 | 1175132 | 1179470 | - | Target "Motif:TcVIPER" 4 4376    |

|   |         |         |   |                                  |
|---|---------|---------|---|----------------------------------|
| 7 | 1175132 | 1179470 | - | Target "Motif:TcVIPER" 4 4376    |
| 7 | 1175132 | 1179470 | - | Target "Motif:TcVIPER" 4 4376    |
| 7 | 1304453 | 1308811 | - | Target "Motif:TcVIPER" 1 4389    |
| 7 | 1304453 | 1308811 | - | Target "Motif:TcVIPER" 1 4389    |
| 7 | 1304453 | 1308811 | - | Target "Motif:TcVIPER" 1 4389    |
| 7 | 1523488 | 1523554 | - | Target "Motif:TcVIPER" 4326 4389 |
| 7 | 1658736 | 1658765 | + | Target "Motif:TcVIPER" 1 29      |
| 7 | 1658941 | 1663169 | + | Target "Motif:TcVIPER" 30 4390   |
| 7 | 1658941 | 1663169 | + | Target "Motif:TcVIPER" 30 4390   |
| 7 | 1906778 | 1907754 | - | Target "Motif:TcVIPER" 1003 1973 |
| 7 | 1908026 | 1908610 | - | Target "Motif:TcVIPER" 6 762     |
| 7 | 2125237 | 2125304 | - | Target "Motif:TcVIPER" 4326 4389 |
| 8 | 103323  | 107655  | + | Target "Motif:TcVIPER" 1 4390    |
| 8 | 103323  | 107655  | + | Target "Motif:TcVIPER" 1 4390    |
| 8 | 103323  | 107655  | + | Target "Motif:TcVIPER" 1 4390    |
| 8 | 136385  | 137073  | - | Target "Motif:TcVIPER" 3683 4379 |
| 8 | 350496  | 353732  | - | Target "Motif:TcVIPER" 1074 4389 |
| 8 | 359091  | 362341  | - | Target "Motif:TcVIPER" 1074 4389 |
| 8 | 359091  | 362341  | - | Target "Motif:TcVIPER" 1074 4389 |
| 8 | 359091  | 362341  | - | Target "Motif:TcVIPER" 1074 4389 |
| 8 | 370518  | 373770  | - | Target "Motif:TcVIPER" 1074 4389 |
| 8 | 370518  | 373770  | - | Target "Motif:TcVIPER" 1074 4389 |
| 8 | 370518  | 373770  | - | Target "Motif:TcVIPER" 1074 4389 |
| 8 | 370518  | 373770  | - | Target "Motif:TcVIPER" 1074 4389 |
| 8 | 398604  | 401822  | - | Target "Motif:TcVIPER" 1074 4389 |
| 8 | 398604  | 401822  | - | Target "Motif:TcVIPER" 1074 4389 |
| 8 | 422336  | 425568  | - | Target "Motif:TcVIPER" 1074 4389 |
| 8 | 682379  | 682867  | - | Target "Motif:TcVIPER" 1074 1555 |
| 8 | 743625  | 746207  | + | Target "Motif:TcVIPER" 1 2641    |
| 8 | 743625  | 746207  | + | Target "Motif:TcVIPER" 1 2641    |
| 8 | 750158  | 754128  | - | Target "Motif:TcVIPER" 160 4209  |
| 8 | 750158  | 754128  | - | Target "Motif:TcVIPER" 160 4209  |
| 8 | 750158  | 754128  | - | Target "Motif:TcVIPER" 160 4209  |
| 8 | 750158  | 754128  | - | Target "Motif:TcVIPER" 160 4209  |
| 8 | 807125  | 807255  | + | Target "Motif:TcVIPER" 4259 4389 |
| 8 | 954874  | 955304  | + | Target "Motif:TcVIPER" 4167 4389 |
| 8 | 1093523 | 1093593 | - | Target "Motif:TcVIPER" 4323 4389 |
| 8 | 1120326 | 1124266 | + | Target "Motif:TcVIPER" 443 4390  |
| 8 | 1120326 | 1124266 | + | Target "Motif:TcVIPER" 443 4390  |
| 8 | 1120326 | 1124266 | + | Target "Motif:TcVIPER" 443 4390  |
| 9 | 5283    | 5733    | + | Target "Motif:TcVIPER" 4167 4390 |
| 9 | 7322    | 7922    | + | Target "Motif:TcVIPER" 19 620    |
| 9 | 8139    | 8383    | + | Target "Motif:TcVIPER" 917 1155  |
| 9 | 88042   | 88287   | - | Target "Motif:TcVIPER" 917 1155  |
| 9 | 88489   | 89102   | - | Target "Motif:TcVIPER" 19 634    |
| 9 | 889520  | 889603  | + | Target "Motif:TcVIPER" 4323 4389 |

|   |         |         |   |                                  |
|---|---------|---------|---|----------------------------------|
| 9 | 1059129 | 1059343 | + | Target "Motif:TcVIPER" 4178 4389 |
| 9 | 1110548 | 1110758 | + | Target "Motif:TcVIPER" 4178 4389 |
| 9 | 1119142 | 1119378 | + | Target "Motif:TcVIPER" 4179 4389 |
