# Supplementary material for: Repeat-Driven Generation of Antigenic Diversity in a Major Human Pathogen, Trypanosoma cruzi
Source: PubMed Central journal article supplement (PMC7966520; doi:10.3389/fcimb.2021.614665), 2021-03-03
Supplement: DataSheet_4.pdf [file DataSheet_4.pdf]

Supplementary table 4, part 1.

| Chromosome | startR  | stopR   | strand | repeat                          |
|------------|---------|---------|--------|---------------------------------|
| 1          | 42888   | 43071   | +      | Target "Motif:SIRE3_TC" 576 759 |
| 1          | 45664   | 45855   | +      | Target "Motif:SIRE" 99 278      |
| 1          | 59617   | 59853   | +      | Target "Motif:SIRE3_TC" 511 744 |
| 1          | 62410   | 62595   | +      | Target "Motif:SIRE" 99 281      |
| 1          | 78843   | 79105   | +      | Target "Motif:SIRE3_TC" 511 766 |
| 1          | 81653   | 82116   | +      | Target "Motif:SIRE3_TC" 272 920 |
| 1          | 93784   | 94243   | +      | Target "Motif:SIRE3_TC" 276 920 |
| 1          | 101064  | 101122  | +      | Target "Motif:SIRE" 87 146      |
| 1          | 105349  | 105536  | +      | Target "Motif:SIRE_TC" 480 668  |
| 1          | 105473  | 105545  | +      | Target "Motif:SIRE" 34 102      |
| 1          | 204738  | 205116  | -      | Target "Motif:SIRE3_TC" 504 782 |
| 1          | 395175  | 395611  | -      | Target "Motif:SIRE3_TC" 504 920 |
| 1          | 434031  | 434215  | +      | Target "Motif:SIRE3_TC" 664 837 |
| 1          | 434274  | 434344  | +      | Target "Motif:SIRE" 32 98       |
| 1          | 540010  | 540168  | -      | Target "Motif:SIRE" 99 251      |
| 1          | 544878  | 545063  | -      | Target "Motif:SIRE" 99 281      |
| 1          | 547616  | 547863  | -      | Target "Motif:SIRE3_TC" 511 750 |
| 1          | 601707  | 601968  | -      | Target "Motif:SIRE3_TC" 511 766 |
| 1          | 610653  | 610844  | -      | Target "Motif:SIRE" 99 278      |
| 1          | 613383  | 613643  | -      | Target "Motif:SIRE3_TC" 511 766 |
| 1          | 617500  | 617687  | -      | Target "Motif:SIRE" 99 281      |
| 1          | 620235  | 620497  | -      | Target "Motif:SIRE3_TC" 511 766 |
| 1          | 629161  | 629350  | -      | Target "Motif:SIRE" 99 278      |
| 1          | 636965  | 637223  | -      | Target "Motif:SIRE3_TC" 511 766 |
| 1          | 645894  | 645940  | -      | Target "Motif:SIRE" 99 137      |
| 1          | 651044  | 651091  | -      | Target "Motif:SIRE" 99 142      |
| 1          | 653630  | 653874  | -      | Target "Motif:SIRE3_TC" 511 750 |
| 1          | 662546  | 662592  | -      | Target "Motif:SIRE" 99 138      |
| 1          | 669994  | 670256  | -      | Target "Motif:SIRE3_TC" 511 766 |
| 1          | 679080  | 679126  | -      | Target "Motif:SIRE" 99 139      |
| 1          | 681692  | 681936  | -      | Target "Motif:SIRE3_TC" 511 750 |
| 1          | 698110  | 698296  | -      | Target "Motif:SIRE" 99 281      |
| 1          | 700843  | 701105  | -      | Target "Motif:SIRE3_TC" 511 766 |
| 1          | 762282  | 762715  | +      | Target "Motif:SIRE3_TC" 509 918 |
| 1          | 806990  | 807439  | +      | Target "Motif:SIRE3_TC" 504 920 |
| 1          | 1004938 | 1005185 | +      | Target "Motif:SIRE" 32 282      |
| 1          | 1005528 | 1005992 | +      | Target "Motif:SIRE3_TC" 283 763 |
| 1          | 1016649 | 1016918 | +      | Target "Motif:SIRE3_TC" 503 763 |
| 1          | 1017524 | 1017973 | +      | Target "Motif:SIRE3_TC" 501 920 |
| 1          | 1019932 | 1020200 | +      | Target "Motif:SIRE3_TC" 503 763 |
| 1          | 1056345 | 1056661 | +      | Target "Motif:SIRE3_TC" 526 831 |
| 1          | 1232878 | 1233192 | +      | Target "Motif:SIRE3_TC" 492 771 |
| 1          | 1233207 | 1233424 | +      | Target "Motif:SIRE_TC" 464 668  |
| 1          | 1246012 | 1246059 | +      | Target "Motif:SIRE" 97 144      |
| 1          | 1254202 | 1254423 | +      | Target "Motif:SIRE" 95 310      |
| 1          | 1254236 | 1254726 | +      | Target "Motif:SIRE7_TC" 250 741 |

|    |         |         |   |                                 |
|----|---------|---------|---|---------------------------------|
| 1  | 1260764 | 1260985 | + | Target "Motif:SIRE" 95 315      |
| 1  | 1260985 | 1261251 | + | Target "Motif:SIRE3_TC" 487 782 |
| 1  | 1263286 | 1263334 | + | Target "Motif:SIRE" 95 150      |
| 1  | 1267377 | 1267450 | + | Target "Motif:SIRE" 33 102      |
| 1  | 1281613 | 1281796 | + | Target "Motif:SIRE" 93 281      |
| 1  | 1369141 | 1369322 | + | Target "Motif:SIRE" 104 279     |
| 1  | 1459799 | 1460269 | + | Target "Motif:SIRE3_TC" 504 919 |
| 1  | 1650298 | 1650636 | - | Target "Motif:SIRE3_TC" 508 920 |
| 1  | 1650636 | 1650705 | - | Target "Motif:SIRE" 98 172      |
| 1  | 1677854 | 1678320 | - | Target "Motif:SIRE3_TC" 485 832 |
| 1  | 1842498 | 1843002 | - | Target "Motif:SIRE3_TC" 280 920 |
| 1  | 1856957 | 1857407 | - | Target "Motif:SIRE3_TC" 495 920 |
| 1  | 1888624 | 1888907 | + | Target "Motif:SIRE3_TC" 511 776 |
| 1  | 1889459 | 1889646 | + | Target "Motif:SIRE" 97 281      |
| 1  | 1901895 | 1902194 | - | Target "Motif:SIRE3_TC" 646 923 |
| 1  | 1902125 | 1902247 | - | Target "Motif:SIRE" 190 313     |
| 1  | 1902273 | 1902455 | + | Target "Motif:SIRE" 101 281     |
| 1  | 2025801 | 2025986 | + | Target "Motif:SIRE" 107 303     |
| 1  | 2682404 | 2682834 | + | Target "Motif:SIRE3_TC" 511 915 |
| 1  | 2986628 | 2987004 | + | Target "Motif:SIRE3_TC" 511 837 |
| 1  | 3057165 | 3057624 | + | Target "Motif:SIRE3_TC" 494 920 |
| 1  | 3103693 | 3103921 | + | Target "Motif:SIRE" 94 313      |
| 10 | 206144  | 206598  | - | Target "Motif:SIRE3_TC" 495 920 |
| 10 | 293539  | 293979  | + | Target "Motif:SIRE3_TC" 508 920 |
| 10 | 523855  | 524052  | + | Target "Motif:SIRE" 94 281      |
| 10 | 524071  | 524329  | + | Target "Motif:SIRE3_TC" 669 902 |
| 10 | 525623  | 525676  | + | Target "Motif:SIRE" 94 146      |
| 10 | 525673  | 525800  | - | Target "Motif:SIRE" 144 271     |
| 10 | 525797  | 525894  | + | Target "Motif:SIRE3_TC" 678 774 |
| 10 | 526020  | 526064  | + | Target "Motif:SIRE7_TC" 650 693 |
| 10 | 543017  | 543517  | + | Target "Motif:SIRE3_TC" 339 920 |
| 10 | 727199  | 727315  | - | Target "Motif:SIRE3_TC" 645 774 |
| 10 | 907408  | 907555  | - | Target "Motif:SIRE" 102 241     |
| 10 | 907907  | 907950  | + | Target "Motif:SIRE" 101 144     |
| 10 | 926261  | 926633  | + | Target "Motif:SIRE3_TC" 504 837 |
| 10 | 977717  | 977908  | + | Target "Motif:SIRE" 101 274     |
| 10 | 990842  | 991179  | + | Target "Motif:SIRE3_TC" 468 774 |
| 10 | 996100  | 996547  | + | Target "Motif:SIRE3_TC" 504 920 |
| 10 | 1067400 | 1067454 | + | Target "Motif:SIRE" 91 146      |
| 11 | 153863  | 153912  | - | Target "Motif:SIRE" 95 145      |
| 11 | 258295  | 258752  | - | Target "Motif:SIRE3_TC" 257 920 |
| 11 | 309173  | 309558  | + | Target "Motif:SIRE3_TC" 496 843 |
| 11 | 634919  | 635390  | + | Target "Motif:SIRE3_TC" 482 920 |
| 11 | 688568  | 688910  | - | Target "Motif:SIRE3_TC" 510 779 |
| 11 | 697427  | 697875  | - | Target "Motif:SIRE3_TC" 504 920 |
| 11 | 713730  | 713776  | - | Target "Motif:SIRE" 95 148      |

|    |         |         |   |                                 |
|----|---------|---------|---|---------------------------------|
| 11 | 716219  | 716650  | + | Target "Motif:SIRE3_TC" 508 920 |
| 11 | 745430  | 745866  | + | Target "Motif:SIRE3_TC" 511 920 |
| 11 | 827100  | 827391  | + | Target "Motif:SIRE3_TC" 480 768 |
| 11 | 845848  | 846322  | + | Target "Motif:SIRE3_TC" 339 920 |
| 11 | 847580  | 847758  | + | Target "Motif:SIRE3_TC" 475 629 |
| 11 | 847603  | 847761  | + | Target "Motif:SIRE" 98 226      |
| 11 | 1014851 | 1015305 | + | Target "Motif:SIRE3_TC" 257 920 |
| 11 | 1020947 | 1021274 | + | Target "Motif:SIRE3_TC" 516 829 |
| 11 | 1021324 | 1021794 | + | Target "Motif:SIRE3_TC" 257 920 |
| 12 | 45769   | 45979   | - | Target "Motif:SIRE" 94 297      |
| 12 | 53440   | 53652   | - | Target "Motif:SIRE" 94 297      |
| 12 | 76444   | 76517   | - | Target "Motif:SIRE7_TC" 646 709 |
| 12 | 76471   | 76544   | - | Target "Motif:SIRE" 37 109      |
| 12 | 82717   | 82789   | - | Target "Motif:SIRE7_TC" 646 709 |
| 12 | 82743   | 82816   | - | Target "Motif:SIRE" 37 109      |
| 12 | 95493   | 95566   | - | Target "Motif:SIRE7_TC" 646 709 |
| 12 | 95520   | 95576   | - | Target "Motif:SIRE" 54 109      |
| 12 | 95786   | 96079   | + | Target "Motif:SIRE3_TC" 544 840 |
| 12 | 96883   | 97260   | + | Target "Motif:SIRE3_TC" 468 838 |
| 12 | 254132  | 254205  | + | Target "Motif:SIRE" 37 109      |
| 12 | 254159  | 254220  | + | Target "Motif:SIRE7_TC" 646 705 |
| 12 | 260420  | 260493  | + | Target "Motif:SIRE" 37 109      |
| 12 | 260447  | 260508  | + | Target "Motif:SIRE7_TC" 646 705 |
| 12 | 266700  | 266773  | + | Target "Motif:SIRE" 37 109      |
| 12 | 266727  | 266788  | + | Target "Motif:SIRE7_TC" 646 705 |
| 12 | 279510  | 279554  | - | Target "Motif:SIRE" 101 147     |
| 12 | 279553  | 279724  | - | Target "Motif:SIRE" 98 272      |
| 12 | 343923  | 343996  | + | Target "Motif:SIRE" 37 109      |
| 12 | 343950  | 344023  | + | Target "Motif:SIRE7_TC" 646 709 |
| 12 | 351232  | 351304  | + | Target "Motif:SIRE" 37 109      |
| 12 | 351258  | 351330  | + | Target "Motif:SIRE7_TC" 646 709 |
| 12 | 368622  | 368695  | + | Target "Motif:SIRE" 37 109      |
| 12 | 368649  | 368722  | + | Target "Motif:SIRE7_TC" 646 709 |
| 12 | 374899  | 374972  | + | Target "Motif:SIRE" 37 109      |
| 12 | 374926  | 374999  | + | Target "Motif:SIRE7_TC" 646 709 |
| 12 | 392797  | 392841  | - | Target "Motif:SIRE" 101 147     |
| 12 | 392854  | 393011  | - | Target "Motif:SIRE" 98 257      |
| 12 | 400256  | 400330  | + | Target "Motif:SIRE" 37 111      |
| 12 | 941933  | 942031  | - | Target "Motif:SIRE7_TC" 620 709 |
| 12 | 941960  | 942033  | - | Target "Motif:SIRE" 37 109      |
| 12 | 1001433 | 1001951 | + | Target "Motif:SIRE3_TC" 463 920 |
| 13 | 316685  | 316740  | - | Target "Motif:SIRE" 93 145      |
| 13 | 396933  | 397250  | + | Target "Motif:SIRE3_TC" 511 771 |
| 13 | 397232  | 397440  | + | Target "Motif:SIRE_TC" 480 688  |
| 13 | 541442  | 541513  | + | Target "Motif:SIRE" 31 101      |
| 13 | 571654  | 571932  | - | Target "Motif:SIRE7_TC" 396 693 |

|    |        |        |   |                                 |
|----|--------|--------|---|---------------------------------|
| 13 | 614662 | 614992 | - | Target "Motif:SIRE3_TC" 505 828 |
| 13 | 619922 | 620383 | - | Target "Motif:SIRE3_TC" 474 920 |
| 13 | 631180 | 631485 | - | Target "Motif:SIRE3_TC" 707 920 |
| 13 | 805733 | 806193 | - | Target "Motif:SIRE3_TC" 503 920 |
| 13 | 807926 | 808247 | - | Target "Motif:SIRE3_TC" 514 777 |
| 13 | 809797 | 809815 | - | Target "Motif:SIRE" 73 90       |
| 13 | 809815 | 810070 | - | Target "Motif:SIRE3_TC" 669 920 |
| 13 | 810022 | 810240 | - | Target "Motif:SIRE" 98 313      |
| 13 | 853768 | 854229 | - | Target "Motif:SIRE3_TC" 503 920 |
| 13 | 855957 | 856124 | - | Target "Motif:SIRE3_TC" 590 777 |
| 13 | 856071 | 856291 | - | Target "Motif:SIRE" 94 312      |
| 13 | 857811 | 857829 | - | Target "Motif:SIRE" 73 90       |
| 13 | 857829 | 858081 | - | Target "Motif:SIRE3_TC" 670 920 |
| 13 | 858034 | 858250 | - | Target "Motif:SIRE" 98 313      |
| 13 | 866100 | 866563 | - | Target "Motif:SIRE3_TC" 503 920 |
| 13 | 868296 | 868464 | - | Target "Motif:SIRE3_TC" 590 777 |
| 13 | 868410 | 868631 | - | Target "Motif:SIRE" 94 312      |
| 13 | 870171 | 870189 | - | Target "Motif:SIRE" 73 90       |
| 13 | 870189 | 870443 | - | Target "Motif:SIRE3_TC" 670 920 |
| 13 | 870396 | 870613 | - | Target "Motif:SIRE" 98 313      |
| 13 | 882013 | 882475 | - | Target "Motif:SIRE3_TC" 503 920 |
| 13 | 884209 | 884376 | - | Target "Motif:SIRE3_TC" 590 777 |
| 13 | 884323 | 884543 | - | Target "Motif:SIRE" 94 312      |
| 13 | 886081 | 886099 | - | Target "Motif:SIRE" 73 90       |
| 13 | 886099 | 886354 | - | Target "Motif:SIRE3_TC" 669 920 |
| 13 | 886306 | 886525 | - | Target "Motif:SIRE" 98 313      |
| 14 | 257770 | 258213 | - | Target "Motif:SIRE3_TC" 510 776 |
| 14 | 258007 | 258215 | - | Target "Motif:SIRE" 98 315      |
| 14 | 264939 | 265442 | + | Target "Motif:SIRE3_TC" 507 920 |
| 14 | 265442 | 265609 | + | Target "Motif:SIRE" 106 261     |
| 14 | 265618 | 265809 | + | Target "Motif:SIRE" 98 276      |
| 14 | 877922 | 878352 | - | Target "Motif:SIRE3_TC" 511 920 |
| 14 | 904554 | 904992 | - | Target "Motif:SIRE3_TC" 524 920 |
| 15 | 23318  | 23367  | - | Target "Motif:SIRE" 95 144      |
| 15 | 31120  | 31189  | - | Target "Motif:SIRE" 37 102      |
| 15 | 267712 | 267947 | - | Target "Motif:SIRE3_TC" 728 920 |
| 15 | 283990 | 284039 | + | Target "Motif:SIRE" 95 151      |
| 15 | 301856 | 302324 | + | Target "Motif:SIRE3_TC" 393 781 |
| 15 | 305096 | 305570 | + | Target "Motif:SIRE3_TC" 474 920 |
| 15 | 390447 | 390489 | - | Target "Motif:SIRE" 102 150     |
| 15 | 408231 | 408560 | - | Target "Motif:SIRE3_TC" 492 771 |
| 15 | 412853 | 413204 | - | Target "Motif:SIRE3_TC" 475 771 |
| 15 | 417451 | 417783 | - | Target "Motif:SIRE3_TC" 492 771 |
| 15 | 422036 | 422364 | - | Target "Motif:SIRE3_TC" 492 771 |
| 15 | 426619 | 426969 | - | Target "Motif:SIRE3_TC" 475 771 |
| 15 | 433289 | 433700 | - | Target "Motif:SIRE3_TC" 514 913 |

|    |         |         |   |                                   |
|----|---------|---------|---|-----------------------------------|
| 15 | 633140  | 633474  | - | Target "Motif:SIRE3_TC" 510 788   |
| 15 | 636101  | 636452  | - | Target "Motif:SIRE3_TC" 504 790   |
| 15 | 647389  | 647729  | - | Target "Motif:SIRE3_TC" 504 788   |
| 15 | 708522  | 708859  | - | Target "Motif:SIRE3_TC" 504 788   |
| 15 | 736705  | 737140  | - | Target "Motif:SIRE3_TC" 423 788   |
| 15 | 739788  | 740122  | - | Target "Motif:SIRE3_TC" 510 788   |
| 15 | 742771  | 743107  | - | Target "Motif:SIRE3_TC" 510 788   |
| 15 | 745757  | 746093  | - | Target "Motif:SIRE3_TC" 510 788   |
| 15 | 748741  | 749075  | - | Target "Motif:SIRE3_TC" 510 788   |
| 15 | 779668  | 779719  | + | Target "Motif:SIRE" 95 148        |
| 15 | 783762  | 784037  | + | Target "Motif:SIRE3_TC" 511 759   |
| 15 | 889262  | 889317  | - | Target "Motif:SIRE" 54 108        |
| 15 | 889399  | 889730  | - | Target "Motif:SIRE3_TC" 504 770   |
| 15 | 949794  | 949812  | - | Target "Motif:SIRE" 73 90         |
| 15 | 949812  | 950064  | - | Target "Motif:SIRE3_TC" 672 920   |
| 15 | 950017  | 950232  | - | Target "Motif:SIRE" 98 313        |
| 16 | 969     | 1016    | + | Target "Motif:SIRE" 95 145        |
| 16 | 327346  | 327784  | - | Target "Motif:SIRE3_TC" 504 919   |
| 16 | 335318  | 335771  | + | Target "Motif:SIRE3_TC" 257 920   |
| 16 | 500120  | 500325  | + | Target "Motif:SIRE3_TC" 728 920   |
| 16 | 567768  | 567817  | - | Target "Motif:SIRE" 95 145        |
| 16 | 578559  | 578608  | + | Target "Motif:SIRE" 95 144        |
| 16 | 667669  | 668089  | + | Target "Motif:SIRE3_TC" 511 920   |
| 16 | 669831  | 670001  | + | Target "Motif:SIRE3_TC" 2911 3081 |
| 16 | 674604  | 675087  | - | Target "Motif:SIRE3_TC" 480 837   |
| 16 | 679961  | 680342  | - | Target "Motif:SIRE3_TC" 511 837   |
| 16 | 710178  | 710660  | - | Target "Motif:SIRE3_TC" 480 837   |
| 16 | 725667  | 725878  | - | Target "Motif:SIRE" 79 312        |
| 16 | 747160  | 747290  | - | Target "Motif:SIRE" 100 223       |
| 16 | 747290  | 747312  | - | Target "Motif:SIRE3_TC" 488 628   |
| 16 | 780280  | 780740  | - | Target "Motif:SIRE3_TC" 504 911   |
| 16 | 850882  | 851322  | - | Target "Motif:SIRE3_TC" 504 920   |
| 16 | 972811  | 973311  | - | Target "Motif:SIRE3_TC" 477 917   |
| 16 | 989996  | 990045  | - | Target "Motif:SIRE" 95 145        |
| 16 | 995686  | 996199  | - | Target "Motif:SIRE3_TC" 479 771   |
| 16 | 1119547 | 1119731 | - | Target "Motif:SIRE" 93 281        |
| 16 | 1130707 | 1130810 | - | Target "Motif:SIRE" 101 202       |
| 16 | 1154102 | 1154595 | + | Target "Motif:SIRE3_TC" 257 920   |
| 16 | 1169227 | 1169586 | + | Target "Motif:SIRE3_TC" 561 919   |
| 16 | 1387711 | 1388164 | + | Target "Motif:SIRE3_TC" 499 920   |
| 16 | 1391277 | 1391761 | + | Target "Motif:SIRE3_TC" 257 912   |
| 18 | 227172  | 227220  | - | Target "Motif:SIRE" 95 148        |
| 18 | 280540  | 280990  | - | Target "Motif:SIRE3_TC" 507 920   |
| 18 | 477703  | 478173  | + | Target "Motif:SIRE3_TC" 315 920   |
| 18 | 571046  | 571242  | + | Target "Motif:SIRE" 91 291        |
| 18 | 579958  | 580185  | - | Target "Motif:SIRE3_TC" 601 793   |

|    |         |         |   |                                 |
|----|---------|---------|---|---------------------------------|
| 18 | 580255  | 580443  | + | Target "Motif:SIRE" 101 291     |
| 18 | 588205  | 588415  | - | Target "Motif:SIRE3_TC" 637 833 |
| 18 | 597405  | 597633  | - | Target "Motif:SIRE3_TC" 601 793 |
| 18 | 603562  | 603790  | - | Target "Motif:SIRE3_TC" 601 793 |
| 18 | 612885  | 613089  | - | Target "Motif:SIRE3_TC" 601 771 |
| 18 | 613153  | 613405  | + | Target "Motif:SIRE3_TC" 505 750 |
| 19 | 29853   | 30196   | - | Target "Motif:SIRE3_TC" 510 838 |
| 19 | 127083  | 127424  | - | Target "Motif:SIRE3_TC" 510 779 |
| 19 | 326997  | 327463  | + | Target "Motif:SIRE3_TC" 339 829 |
| 19 | 399092  | 399153  | + | Target "Motif:SIRE" 98 139      |
| 19 | 403772  | 404236  | + | Target "Motif:SIRE3_TC" 494 919 |
| 19 | 442001  | 442413  | + | Target "Motif:SIRE3_TC" 512 908 |
| 19 | 475586  | 476030  | + | Target "Motif:SIRE3_TC" 503 920 |
| 19 | 515991  | 516399  | + | Target "Motif:SIRE3_TC" 511 908 |
| 19 | 544285  | 544728  | - | Target "Motif:SIRE3_TC" 504 920 |
| 2  | 15362   | 15776   | - | Target "Motif:SIRE3_TC" 511 913 |
| 2  | 18586   | 18638   | - | Target "Motif:SIRE3_TC" 505 770 |
| 2  | 18638   | 18855   | - | Target "Motif:SIRE" 95 315      |
| 2  | 114925  | 115381  | + | Target "Motif:SIRE3_TC" 390 824 |
| 2  | 136967  | 137254  | + | Target "Motif:SIRE3_TC" 400 920 |
| 2  | 218239  | 218436  | + | Target "Motif:SIRE3_TC" 593 777 |
| 2  | 231536  | 231736  | + | Target "Motif:SIRE" 103 307     |
| 2  | 347913  | 348239  | + | Target "Motif:SIRE3_TC" 513 828 |
| 2  | 438346  | 438805  | + | Target "Motif:SIRE3_TC" 482 920 |
| 2  | 476022  | 476230  | + | Target "Motif:SIRE" 94 296      |
| 2  | 627954  | 628387  | + | Target "Motif:SIRE3_TC" 511 920 |
| 2  | 641576  | 641924  | + | Target "Motif:SIRE3_TC" 510 782 |
| 2  | 652761  | 653106  | - | Target "Motif:SIRE3_TC" 510 838 |
| 2  | 907481  | 907521  | - | Target "Motif:SIRE" 101 147     |
| 2  | 911412  | 911769  | - | Target "Motif:SIRE3_TC" 514 838 |
| 2  | 957732  | 958204  | + | Target "Motif:SIRE3_TC" 339 920 |
| 2  | 995546  | 995767  | + | Target "Motif:SIRE" 95 315      |
| 2  | 995767  | 995910  | + | Target "Motif:SIRE3_TC" 505 782 |
| 2  | 998038  | 998497  | + | Target "Motif:SIRE3_TC" 481 920 |
| 2  | 1028884 | 1029422 | + | Target "Motif:SIRE7_TC" 271 920 |
| 2  | 1035402 | 1035844 | + | Target "Motif:SIRE3_TC" 504 911 |
| 2  | 1039889 | 1039961 | + | Target "Motif:SIRE" 34 102      |
| 2  | 1098009 | 1098216 | + | Target "Motif:SIRE" 95 297      |
| 2  | 1128682 | 1128869 | + | Target "Motif:SIRE" 94 281      |
| 2  | 1433591 | 1433633 | - | Target "Motif:SIRE" 102 146     |
| 2  | 1643791 | 1644233 | + | Target "Motif:SIRE3_TC" 499 911 |
| 2  | 1718851 | 1719284 | + | Target "Motif:SIRE3_TC" 511 918 |
| 2  | 1728654 | 1728704 | + | Target "Motif:SIRE" 95 144      |
| 2  | 1733017 | 1733199 | + | Target "Motif:SIRE3_TC" 485 668 |
| 2  | 1756659 | 1757098 | + | Target "Motif:SIRE3_TC" 511 918 |
| 2  | 1764012 | 1764184 | + | Target "Motif:SIRE3_TC" 595 774 |

|    |         |         |   |                                 |
|----|---------|---------|---|---------------------------------|
| 2  | 1764202 | 1764348 | + | Target "Motif:SIRE3_TC" 784 918 |
| 2  | 1781173 | 1781611 | + | Target "Motif:SIRE3_TC" 511 918 |
| 20 | 194694  | 194874  | + | Target "Motif:SIRE" 94 278      |
| 20 | 194911  | 195055  | + | Target "Motif:SIRE7_TC" 532 682 |
| 20 | 236629  | 236812  | + | Target "Motif:SIRE" 94 278      |
| 20 | 236847  | 236991  | + | Target "Motif:SIRE7_TC" 532 682 |
| 20 | 336275  | 336737  | - | Target "Motif:SIRE3_TC" 492 920 |
| 20 | 339197  | 339661  | - | Target "Motif:SIRE3_TC" 492 920 |
| 20 | 341149  | 341611  | - | Target "Motif:SIRE3_TC" 492 920 |
| 20 | 346018  | 346478  | - | Target "Motif:SIRE3_TC" 494 920 |
| 20 | 359329  | 359687  | + | Target "Motif:SIRE3_TC" 596 920 |
| 20 | 360366  | 360836  | + | Target "Motif:SIRE3_TC" 393 781 |
| 20 | 505263  | 505443  | + | Target "Motif:SIRE" 94 278      |
| 20 | 505482  | 505626  | + | Target "Motif:SIRE7_TC" 532 682 |
| 20 | 518488  | 518666  | + | Target "Motif:SIRE" 94 278      |
| 20 | 518668  | 518846  | + | Target "Motif:SIRE7_TC" 532 674 |
| 20 | 726065  | 726272  | + | Target "Motif:SIRE" 94 297      |
| 21 | 10132   | 10470   | + | Target "Motif:SIRE3_TC" 505 828 |
| 21 | 102625  | 102973  | - | Target "Motif:SIRE3_TC" 504 832 |
| 21 | 109455  | 109901  | - | Target "Motif:SIRE3_TC" 504 920 |
| 21 | 128151  | 128200  | - | Target "Motif:SIRE" 95 144      |
| 21 | 139481  | 139960  | - | Target "Motif:SIRE3_TC" 486 920 |
| 21 | 140256  | 140499  | - | Target "Motif:SIRE3_TC" 260 920 |
| 21 | 140499  | 140712  | - | Target "Motif:SIRE" 98 315      |
| 21 | 145941  | 145990  | + | Target "Motif:SIRE" 95 145      |
| 21 | 165280  | 165618  | - | Target "Motif:SIRE3_TC" 503 788 |
| 21 | 301538  | 301609  | - | Target "Motif:SIRE7_TC" 607 682 |
| 21 | 301689  | 301828  | - | Target "Motif:SIRE3_TC" 520 780 |
| 21 | 301828  | 302053  | - | Target "Motif:SIRE" 101 315     |
| 21 | 446300  | 446439  | - | Target "Motif:SIRE3_TC" 520 780 |
| 21 | 446439  | 446664  | - | Target "Motif:SIRE" 101 315     |
| 21 | 499810  | 500277  | + | Target "Motif:SIRE3_TC" 489 920 |
| 21 | 702392  | 702702  | - | Target "Motif:SIRE3_TC" 511 771 |
| 22 | 4761    | 4811    | + | Target "Motif:SIRE" 94 143      |
| 22 | 13127   | 13170   | + | Target "Motif:SIRE3_TC" 463 673 |
| 22 | 13170   | 13351   | + | Target "Motif:SIRE" 94 270      |
| 23 | 515710  | 516140  | - | Target "Motif:SIRE3_TC" 508 920 |
| 23 | 688557  | 688606  | + | Target "Motif:SIRE" 95 145      |
| 23 | 696377  | 696598  | + | Target "Motif:SIRE" 101 313     |
| 24 | 76166   | 76210   | - | Target "Motif:SIRE" 100 144     |
| 24 | 109513  | 109850  | - | Target "Motif:SIRE3_TC" 510 771 |
| 24 | 325025  | 325362  | + | Target "Motif:SIRE3_TC" 510 771 |
| 24 | 387371  | 387573  | + | Target "Motif:SIRE3_TC" 597 771 |
| 24 | 465102  | 465436  | - | Target "Motif:SIRE3_TC" 510 771 |
| 24 | 600789  | 601223  | + | Target "Motif:SIRE3_TC" 505 911 |
| 24 | 678916  | 679125  | + | Target "Motif:SIRE" 94 297      |

|    |        |        |   |                                 |
|----|--------|--------|---|---------------------------------|
| 24 | 684209 | 684421 | + | Target "Motif:SIRE" 95 315      |
| 24 | 684421 | 684552 | + | Target "Motif:SIRE3_TC" 505 776 |
| 24 | 691160 | 691232 | + | Target "Motif:SIRE" 34 102      |
| 25 | 2859   | 2913   | - | Target "Motif:SIRE" 91 142      |
| 25 | 191912 | 192404 | + | Target "Motif:SIRE3_TC" 257 920 |
| 25 | 231438 | 231585 | - | Target "Motif:SIRE" 101 241     |
| 25 | 678278 | 678422 | - | Target "Motif:SIRE" 103 241     |
| 25 | 680346 | 680493 | + | Target "Motif:SIRE" 101 241     |
| 26 | 73092  | 73540  | + | Target "Motif:SIRE3_TC" 290 910 |
| 26 | 152130 | 152173 | + | Target "Motif:SIRE" 101 144     |
| 26 | 235535 | 235554 | - | Target "Motif:SIRE" 102 125     |
| 26 | 235554 | 235987 | - | Target "Motif:SIRE3_TC" 508 920 |
| 26 | 323982 | 324225 | - | Target "Motif:SIRE3_TC" 516 768 |
| 26 | 550955 | 551134 | + | Target "Motif:SIRE" 101 281     |
| 26 | 556257 | 556476 | + | Target "Motif:SIRE" 95 315      |
| 26 | 556476 | 556620 | + | Target "Motif:SIRE3_TC" 505 782 |
| 26 | 563478 | 563549 | + | Target "Motif:SIRE" 34 102      |
| 26 | 627565 | 628107 | + | Target "Motif:SIRE7_TC" 265 920 |
| 26 | 669268 | 669493 | + | Target "Motif:SIRE" 95 315      |
| 26 | 669301 | 669790 | + | Target "Motif:SIRE7_TC" 250 741 |
| 27 | 1311   | 1502   | - | Target "Motif:SIRE3_TC" 646 831 |
| 27 | 1433   | 1573   | - | Target "Motif:SIRE" 170 313     |
| 27 | 1582   | 1753   | + | Target "Motif:SIRE" 105 281     |
| 27 | 10538  | 10736  | - | Target "Motif:SIRE3_TC" 646 831 |
| 27 | 10667  | 10810  | - | Target "Motif:SIRE" 168 313     |
| 27 | 10816  | 10992  | + | Target "Motif:SIRE" 103 281     |
| 27 | 158369 | 158824 | - | Target "Motif:SIRE3_TC" 511 920 |
| 27 | 171164 | 171616 | - | Target "Motif:SIRE3_TC" 511 920 |
| 27 | 178461 | 178910 | - | Target "Motif:SIRE3_TC" 511 920 |
| 27 | 183515 | 183844 | - | Target "Motif:SIRE3_TC" 492 771 |
| 27 | 188060 | 188390 | - | Target "Motif:SIRE3_TC" 492 771 |
| 27 | 194679 | 195178 | - | Target "Motif:SIRE3_TC" 511 913 |
| 27 | 203153 | 203605 | - | Target "Motif:SIRE3_TC" 511 920 |
| 27 | 239553 | 239983 | - | Target "Motif:SIRE3_TC" 511 920 |
| 27 | 408006 | 408298 | - | Target "Motif:SIRE3_TC" 669 920 |
| 27 | 411639 | 411923 | - | Target "Motif:SIRE3_TC" 669 920 |
| 27 | 415279 | 415564 | - | Target "Motif:SIRE3_TC" 669 920 |
| 27 | 418919 | 419204 | - | Target "Motif:SIRE3_TC" 669 920 |
| 27 | 422551 | 422841 | - | Target "Motif:SIRE3_TC" 669 920 |
| 27 | 430794 | 431234 | + | Target "Motif:SIRE3_TC" 341 909 |
| 27 | 484089 | 484314 | + | Target "Motif:SIRE" 94 313      |
| 27 | 484314 | 484525 | + | Target "Motif:SIRE3_TC" 357 898 |
| 27 | 509905 | 510104 | + | Target "Motif:SIRE" 101 295     |
| 27 | 536804 | 537008 | + | Target "Motif:SIRE" 101 300     |
| 27 | 578348 | 578781 | + | Target "Motif:SIRE3_TC" 502 920 |
| 28 | 226507 | 226726 | + | Target "Motif:SIRE" 110 313     |



|    |        |        |   |                                 |
|----|--------|--------|---|---------------------------------|
| 28 | 226595 | 226986 | + | Target "Motif:SIRE3_TC" 319 920 |
| 28 | 279577 | 279797 | + | Target "Motif:SIRE" 110 313     |
| 28 | 279666 | 280057 | + | Target "Motif:SIRE3_TC" 319 920 |
| 28 | 287027 | 287537 | + | Target "Motif:SIRE3_TC" 319 920 |
| 28 | 312823 | 312997 | + | Target "Motif:SIRE" 99 276      |
| 28 | 386140 | 386317 | + | Target "Motif:SIRE" 95 277      |
| 28 | 427276 | 427474 | + | Target "Motif:SIRE" 98 294      |
| 29 | 122413 | 122912 | - | Target "Motif:SIRE3_TC" 485 782 |
| 29 | 122941 | 122994 | - | Target "Motif:SIRE3_TC" 468 511 |
| 29 | 136143 | 136578 | + | Target "Motif:SIRE3_TC" 504 920 |
| 29 | 146730 | 147164 | + | Target "Motif:SIRE3_TC" 504 920 |
| 29 | 297573 | 297785 | + | Target "Motif:SIRE" 102 315     |
| 29 | 297785 | 298045 | + | Target "Motif:SIRE3_TC" 468 778 |
| 29 | 302572 | 302759 | + | Target "Motif:SIRE" 98 281      |
| 29 | 320132 | 320319 | - | Target "Motif:SIRE" 98 281      |
| 29 | 337401 | 337849 | + | Target "Motif:SIRE3_TC" 504 920 |
| 29 | 395194 | 395405 | + | Target "Motif:SIRE" 94 297      |
| 29 | 497610 | 497666 | - | Target "Motif:SIRE3_TC" 568 771 |
| 29 | 497666 | 497881 | - | Target "Motif:SIRE" 98 313      |
| 29 | 497881 | 497901 | - | Target "Motif:SIRE3_TC" 487 567 |
| 29 | 502813 | 503096 | - | Target "Motif:SIRE3_TC" 561 778 |
| 29 | 507831 | 507870 | - | Target "Motif:SIRE" 98 140      |
| 29 | 509449 | 509499 | + | Target "Motif:SIRE" 94 144      |
| 29 | 514255 | 514669 | + | Target "Motif:SIRE3_TC" 280 920 |
| 29 | 516507 | 517008 | + | Target "Motif:SIRE3_TC" 283 920 |
| 3  | 991    | 1433   | - | Target "Motif:SIRE3_TC" 481 920 |
| 3  | 3426   | 3615   | - | Target "Motif:SIRE_TC" 485 667  |
| 3  | 3590   | 3694   | - | Target "Motif:SIRE3_TC" 507 774 |
| 3  | 3694   | 3905   | - | Target "Motif:SIRE" 98 315      |
| 3  | 9017   | 9234   | - | Target "Motif:SIRE" 94 304      |
| 3  | 34561  | 34633  | - | Target "Motif:SIRE" 34 102      |
| 3  | 39019  | 39483  | - | Target "Motif:SIRE3_TC" 481 920 |
| 3  | 41629  | 41769  | - | Target "Motif:SIRE3_TC" 505 777 |
| 3  | 41769  | 41992  | - | Target "Motif:SIRE" 95 315      |
| 3  | 47978  | 48473  | - | Target "Motif:SIRE7_TC" 250 741 |
| 3  | 48279  | 48507  | - | Target "Motif:SIRE" 95 315      |
| 3  | 52585  | 52755  | - | Target "Motif:SIRE" 94 268      |
| 3  | 104060 | 104493 | - | Target "Motif:SIRE3_TC" 502 920 |
| 3  | 109718 | 109945 | - | Target "Motif:SIRE3_TC" 506 899 |
| 3  | 109945 | 110165 | - | Target "Motif:SIRE" 94 313      |
| 3  | 143755 | 144209 | - | Target "Motif:SIRE3_TC" 510 920 |
| 3  | 246770 | 247257 | - | Target "Motif:SIRE3_TC" 303 899 |
| 3  | 251674 | 251743 | - | Target "Motif:SIRE" 53 121      |
| 3  | 251697 | 252181 | - | Target "Motif:SIRE3_TC" 370 899 |
| 3  | 292143 | 292376 | - | Target "Motif:SIRE3_TC" 703 912 |
| 3  | 296396 | 296842 | - | Target "Motif:SIRE3_TC" 504 920 |

|    |         |         |   |                                 |
|----|---------|---------|---|---------------------------------|
| 3  | 611076  | 611578  | + | Target "Motif:SIRE3_TC" 507 920 |
| 3  | 645992  | 646181  | - | Target "Motif:SIRE" 98 276      |
| 3  | 646190  | 646357  | - | Target "Motif:SIRE" 106 261     |
| 3  | 646357  | 646855  | - | Target "Motif:SIRE3_TC" 507 920 |
| 3  | 669785  | 670135  | - | Target "Motif:SIRE3_TC" 510 838 |
| 3  | 688336  | 688526  | - | Target "Motif:SIRE" 98 276      |
| 3  | 688535  | 688700  | - | Target "Motif:SIRE" 106 261     |
| 3  | 688700  | 689205  | - | Target "Motif:SIRE3_TC" 507 920 |
| 3  | 957961  | 958433  | - | Target "Motif:SIRE3_TC" 474 920 |
| 3  | 961206  | 961675  | - | Target "Motif:SIRE3_TC" 486 781 |
| 3  | 1082110 | 1082627 | + | Target "Motif:SIRE3_TC" 482 771 |
| 3  | 1082562 | 1082894 | + | Target "Motif:SIRE" 38 315      |
| 3  | 1082838 | 1083101 | + | Target "Motif:SIRE3_TC" 664 903 |
| 3  | 1092993 | 1093192 | + | Target "Motif:SIRE3_TC" 482 680 |
| 3  | 1093230 | 1093516 | + | Target "Motif:SIRE3_TC" 603 770 |
| 3  | 1093451 | 1093781 | + | Target "Motif:SIRE" 38 315      |
| 3  | 1093716 | 1094037 | + | Target "Motif:SIRE3_TC" 391 771 |
| 3  | 1235721 | 1235999 | + | Target "Motif:SIRE3_TC" 671 771 |
| 3  | 1317774 | 1317818 | + | Target "Motif:SIRE3_TC" 507 550 |
| 3  | 1317779 | 1317998 | + | Target "Motif:SIRE" 102 281     |
| 3  | 1317870 | 1318119 | + | Target "Motif:SIRE3_TC" 562 769 |
| 3  | 1324351 | 1324693 | + | Target "Motif:SIRE3_TC" 393 907 |
| 3  | 1363890 | 1364055 | + | Target "Motif:SIRE3_TC" 660 822 |
| 3  | 1454612 | 1455090 | + | Target "Motif:SIRE3_TC" 464 920 |
| 3  | 1629465 | 1629513 | + | Target "Motif:SIRE" 95 143      |
| 30 | 146674  | 147046  | - | Target "Motif:SIRE3_TC" 510 782 |
| 30 | 258969  | 259341  | + | Target "Motif:SIRE3_TC" 510 782 |
| 31 | 323850  | 324334  | - | Target "Motif:SIRE3_TC" 511 837 |
| 31 | 392189  | 392670  | + | Target "Motif:SIRE3_TC" 480 836 |
| 31 | 421720  | 421996  | + | Target "Motif:SIRE3_TC" 429 920 |
| 31 | 446089  | 446132  | + | Target "Motif:SIRE3_TC" 464 552 |
| 31 | 446132  | 446349  | + | Target "Motif:SIRE" 98 310      |
| 31 | 446349  | 446482  | + | Target "Motif:SIRE3_TC" 553 836 |
| 31 | 453830  | 454198  | + | Target "Motif:SIRE3_TC" 494 837 |
| 31 | 487519  | 487984  | + | Target "Motif:SIRE3_TC" 492 920 |
| 32 | 385565  | 385755  | - | Target "Motif:SIRE" 94 281      |
| 32 | 407769  | 408211  | - | Target "Motif:SIRE3_TC" 511 918 |
| 32 | 441036  | 441218  | - | Target "Motif:SIRE_TC" 485 668  |
| 32 | 449841  | 450284  | - | Target "Motif:SIRE3_TC" 511 918 |
| 32 | 548355  | 548792  | + | Target "Motif:SIRE3_TC" 511 919 |
| 32 | 608794  | 609044  | - | Target "Motif:SIRE7_TC" 444 708 |
| 32 | 609096  | 609508  | - | Target "Motif:SIRE3_TC" 504 920 |
| 32 | 613700  | 613748  | - | Target "Motif:SIRE" 98 143      |
| 32 | 710044  | 710254  | + | Target "Motif:SIRE" 101 314     |
| 32 | 710254  | 710311  | + | Target "Motif:SIRE3_TC" 511 771 |
| 32 | 710325  | 710875  | + | Target "Motif:SIRE_TC" 469 920  |

|    |        |        |   |                                 |
|----|--------|--------|---|---------------------------------|
| 32 | 713068 | 713282 | + | Target "Motif:SIRE" 95 314      |
| 32 | 713282 | 713339 | + | Target "Motif:SIRE3_TC" 530 771 |
| 32 | 713353 | 713904 | + | Target "Motif:SIRE_TC" 469 920  |
| 32 | 719472 | 719688 | + | Target "Motif:SIRE" 95 314      |
| 32 | 719688 | 719745 | + | Target "Motif:SIRE3_TC" 530 771 |
| 32 | 719759 | 720308 | + | Target "Motif:SIRE_TC" 469 920  |
| 32 | 724196 | 724412 | + | Target "Motif:SIRE" 95 314      |
| 32 | 724412 | 724469 | + | Target "Motif:SIRE3_TC" 530 771 |
| 32 | 724482 | 725033 | + | Target "Motif:SIRE_TC" 469 920  |
| 32 | 728923 | 729139 | + | Target "Motif:SIRE" 95 314      |
| 32 | 729139 | 729760 | + | Target "Motif:SIRE_TC" 476 920  |
| 32 | 733651 | 733867 | + | Target "Motif:SIRE" 95 314      |
| 32 | 733867 | 734489 | + | Target "Motif:SIRE_TC" 476 920  |
| 32 | 736683 | 736899 | + | Target "Motif:SIRE" 95 314      |
| 32 | 736899 | 737519 | + | Target "Motif:SIRE_TC" 476 920  |
| 32 | 741247 | 741463 | + | Target "Motif:SIRE" 95 314      |
| 32 | 741463 | 742084 | + | Target "Motif:SIRE_TC" 476 920  |
| 32 | 744281 | 744497 | + | Target "Motif:SIRE" 95 314      |
| 32 | 744497 | 745118 | + | Target "Motif:SIRE_TC" 476 920  |
| 32 | 748953 | 748986 | + | Target "Motif:SIRE_TC" 469 491  |
| 32 | 748986 | 749201 | + | Target "Motif:SIRE" 95 314      |
| 32 | 749201 | 749822 | + | Target "Motif:SIRE_TC" 492 920  |
| 32 | 752009 | 752225 | + | Target "Motif:SIRE" 95 314      |
| 32 | 752225 | 752844 | + | Target "Motif:SIRE_TC" 476 920  |
| 32 | 757261 | 757479 | + | Target "Motif:SIRE" 92 314      |
| 32 | 757262 | 757530 | + | Target "Motif:SIRE3_TC" 502 765 |
| 32 | 757555 | 757745 | + | Target "Motif:SIRE3_TC" 473 667 |
| 32 | 757715 | 757751 | + | Target "Motif:SIRE7_TC" 646 681 |
| 32 | 761817 | 762153 | + | Target "Motif:SIRE3_TC" 647 920 |
| 32 | 813156 | 813343 | + | Target "Motif:SIRE" 93 281      |
| 32 | 905801 | 906248 | + | Target "Motif:SIRE3_TC" 494 920 |
| 32 | 992763 | 993055 | - | Target "Motif:SIRE3_TC" 511 771 |
| 32 | 992848 | 993061 | - | Target "Motif:SIRE" 95 315      |
| 32 | 999217 | 999491 | - | Target "Motif:SIRE3_TC" 513 772 |
| 33 | 208317 | 208534 | + | Target "Motif:SIRE" 98 315      |
| 33 | 208320 | 208759 | + | Target "Motif:SIRE3_TC" 511 920 |
| 33 | 213143 | 213192 | - | Target "Motif:SIRE" 95 141      |
| 33 | 264795 | 264841 | + | Target "Motif:SIRE" 95 139      |
| 33 | 426642 | 427137 | - | Target "Motif:SIRE3_TC" 464 770 |
| 33 | 436559 | 436960 | - | Target "Motif:SIRE3_TC" 556 911 |
| 33 | 436989 | 437036 | - | Target "Motif:SIRE3_TC" 509 555 |
| 33 | 475500 | 475568 | + | Target "Motif:SIRE" 37 102      |
| 34 | 172219 | 172405 | - | Target "Motif:SIRE" 95 281      |
| 34 | 376135 | 376244 | + | Target "Motif:SIRE" 98 206      |
| 34 | 376138 | 376518 | + | Target "Motif:SIRE3_TC" 511 837 |
| 34 | 415504 | 415682 | + | Target "Motif:SIRE" 95 281      |

|    |        |        |   |                                 |
|----|--------|--------|---|---------------------------------|
| 34 | 422677 | 423154 | + | Target "Motif:SIRE3_TC" 290 920 |
| 34 | 487088 | 487318 | + | Target "Motif:SIRE" 94 313      |
| 34 | 487318 | 487534 | + | Target "Motif:SIRE3_TC" 506 827 |
| 35 | 57880  | 58228  | + | Target "Motif:SIRE3_TC" 510 838 |
| 35 | 77509  | 77852  | + | Target "Motif:SIRE3_TC" 510 838 |
| 35 | 215413 | 215752 | - | Target "Motif:SIRE3_TC" 597 919 |
| 35 | 362032 | 362495 | - | Target "Motif:SIRE3_TC" 504 920 |
| 35 | 381196 | 381208 | - | Target "Motif:SIRE" 106 119     |
| 35 | 381353 | 381425 | - | Target "Motif:SIRE" 35 105      |
| 35 | 386008 | 386050 | - | Target "Motif:SIRE" 102 147     |
| 35 | 394704 | 394746 | - | Target "Motif:SIRE" 102 147     |
| 35 | 397730 | 397772 | + | Target "Motif:SIRE" 102 146     |
| 35 | 510103 | 510149 | - | Target "Motif:SIRE" 98 146      |
| 35 | 513125 | 513171 | + | Target "Motif:SIRE" 98 146      |
| 35 | 517787 | 517859 | + | Target "Motif:SIRE" 34 104      |
| 35 | 517948 | 517960 | + | Target "Motif:SIRE" 105 118     |
| 36 | 40435  | 40646  | - | Target "Motif:SIRE" 95 313      |
| 36 | 65873  | 66154  | - | Target "Motif:SIRE3_TC" 671 903 |
| 36 | 90223  | 90506  | - | Target "Motif:SIRE3_TC" 671 903 |
| 36 | 299441 | 299461 | + | Target "Motif:SIRE3_TC" 487 556 |
| 36 | 299461 | 299675 | + | Target "Motif:SIRE" 98 313      |
| 36 | 299675 | 299732 | + | Target "Motif:SIRE3_TC" 557 771 |
| 36 | 309474 | 309961 | - | Target "Motif:SIRE3_TC" 511 827 |
| 36 | 316076 | 316188 | - | Target "Motif:SIRE" 165 281     |
| 36 | 316216 | 316279 | - | Target "Motif:SIRE" 99 164      |
| 36 | 412484 | 412996 | + | Target "Motif:SIRE3_TC" 504 920 |
| 37 | 12153  | 12662  | + | Target "Motif:SIRE3_TC" 290 920 |
| 37 | 33374  | 33431  | - | Target "Motif:SIRE3_TC" 567 771 |
| 37 | 33431  | 33646  | - | Target "Motif:SIRE" 98 313      |
| 37 | 33646  | 33666  | - | Target "Motif:SIRE3_TC" 487 566 |
| 37 | 42828  | 42867  | - | Target "Motif:SIRE" 98 140      |
| 37 | 44446  | 44495  | + | Target "Motif:SIRE" 94 144      |
| 37 | 75397  | 75694  | - | Target "Motif:SIRE3_TC" 647 915 |
| 37 | 75774  | 75947  | + | Target "Motif:SIRE" 101 282     |
| 37 | 92285  | 92577  | - | Target "Motif:SIRE3_TC" 646 916 |
| 37 | 92508  | 92660  | - | Target "Motif:SIRE" 163 313     |
| 37 | 92655  | 92827  | + | Target "Motif:SIRE" 101 282     |
| 37 | 124128 | 124424 | - | Target "Motif:SIRE3_TC" 646 916 |
| 37 | 124354 | 124469 | - | Target "Motif:SIRE" 198 313     |
| 37 | 124502 | 124672 | + | Target "Motif:SIRE" 101 282     |
| 37 | 151696 | 151764 | + | Target "Motif:SIRE" 98 163      |
| 37 | 191869 | 192039 | + | Target "Motif:SIRE" 99 274      |
| 37 | 204241 | 204529 | - | Target "Motif:SIRE3_TC" 646 916 |
| 37 | 204462 | 204612 | - | Target "Motif:SIRE" 163 313     |
| 37 | 204607 | 204780 | + | Target "Motif:SIRE" 101 282     |
| 37 | 216956 | 217247 | - | Target "Motif:SIRE3_TC" 646 916 |

|    |        |        |   |                                 |
|----|--------|--------|---|---------------------------------|
| 37 | 217182 | 217293 | - | Target "Motif:SIRE" 197 309     |
| 37 | 260790 | 260963 | - | Target "Motif:SIRE" 101 282     |
| 37 | 260980 | 261107 | + | Target "Motif:SIRE" 181 309     |
| 37 | 261042 | 261335 | + | Target "Motif:SIRE3_TC" 646 916 |
| 37 | 278322 | 278509 | - | Target "Motif:SIRE" 101 295     |
| 37 | 311131 | 311495 | - | Target "Motif:SIRE3_TC" 511 782 |
| 37 | 328454 | 328629 | + | Target "Motif:SIRE" 104 281     |
| 37 | 341617 | 341976 | - | Target "Motif:SIRE3_TC" 504 782 |
| 37 | 353969 | 354428 | + | Target "Motif:SIRE3_TC" 260 920 |
| 37 | 358862 | 359224 | + | Target "Motif:SIRE3_TC" 504 782 |
| 37 | 361477 | 361528 | + | Target "Motif:SIRE" 95 148      |
| 37 | 503769 | 504247 | + | Target "Motif:SIRE3_TC" 251 911 |
| 38 | 419945 | 420120 | + | Target "Motif:SIRE" 107 281     |
| 39 | 93176  | 93515  | - | Target "Motif:SIRE3_TC" 505 828 |
| 39 | 96405  | 96817  | - | Target "Motif:SIRE3_TC" 505 903 |
| 39 | 99707  | 100120 | - | Target "Motif:SIRE3_TC" 505 903 |
| 39 | 103006 | 103419 | - | Target "Motif:SIRE3_TC" 505 903 |
| 39 | 106301 | 106714 | - | Target "Motif:SIRE3_TC" 505 903 |
| 39 | 365085 | 365422 | + | Target "Motif:SIRE3_TC" 505 828 |
| 39 | 368379 | 368715 | + | Target "Motif:SIRE3_TC" 505 828 |
| 4  | 60503  | 60930  | + | Target "Motif:SIRE3_TC" 483 870 |
| 4  | 94753  | 95271  | + | Target "Motif:SIRE3_TC" 390 919 |
| 4  | 101028 | 101494 | + | Target "Motif:SIRE7_TC" 231 694 |
| 4  | 211431 | 211717 | + | Target "Motif:SIRE3_TC" 504 774 |
| 4  | 213471 | 213799 | + | Target "Motif:SIRE3_TC" 504 774 |
| 4  | 215515 | 215843 | + | Target "Motif:SIRE3_TC" 504 774 |
| 4  | 217547 | 217894 | + | Target "Motif:SIRE3_TC" 504 776 |
| 4  | 242035 | 242363 | + | Target "Motif:SIRE3_TC" 504 774 |
| 4  | 273368 | 273695 | + | Target "Motif:SIRE3_TC" 504 774 |
| 4  | 277013 | 277340 | + | Target "Motif:SIRE3_TC" 504 774 |
| 4  | 292255 | 292540 | + | Target "Motif:SIRE3_TC" 504 774 |
| 4  | 295873 | 296320 | + | Target "Motif:SIRE3_TC" 504 778 |
| 4  | 308375 | 308703 | + | Target "Motif:SIRE3_TC" 504 774 |
| 4  | 316748 | 317195 | + | Target "Motif:SIRE3_TC" 504 778 |
| 4  | 328418 | 328737 | + | Target "Motif:SIRE3_TC" 504 774 |
| 4  | 330432 | 330880 | + | Target "Motif:SIRE3_TC" 504 774 |
| 4  | 332477 | 332920 | + | Target "Motif:SIRE3_TC" 504 774 |
| 4  | 334488 | 334929 | + | Target "Motif:SIRE3_TC" 504 774 |
| 4  | 357511 | 357776 | + | Target "Motif:SIRE3_TC" 518 774 |
| 4  | 359518 | 359843 | + | Target "Motif:SIRE3_TC" 504 774 |
| 4  | 361563 | 362001 | + | Target "Motif:SIRE3_TC" 515 774 |
| 4  | 363590 | 363914 | + | Target "Motif:SIRE3_TC" 504 774 |
| 4  | 365601 | 366051 | + | Target "Motif:SIRE3_TC" 504 774 |
| 4  | 367632 | 367957 | + | Target "Motif:SIRE3_TC" 505 774 |
| 4  | 369665 | 369989 | + | Target "Motif:SIRE3_TC" 505 774 |
| 4  | 371699 | 372024 | + | Target "Motif:SIRE3_TC" 504 774 |

|   |        |        |   |                                 |
|---|--------|--------|---|---------------------------------|
| 4 | 383754 | 384080 | + | Target "Motif:SIRE3_TC" 504 774 |
| 4 | 385787 | 385987 | + | Target "Motif:SIRE" 98 302      |
| 4 | 403580 | 404029 | + | Target "Motif:SIRE3_TC" 504 774 |
| 4 | 405616 | 405943 | + | Target "Motif:SIRE3_TC" 504 774 |
| 4 | 407650 | 407931 | + | Target "Motif:SIRE3_TC" 504 774 |
| 4 | 409686 | 410136 | + | Target "Motif:SIRE3_TC" 504 774 |
| 4 | 434632 | 434959 | + | Target "Motif:SIRE3_TC" 504 774 |
| 4 | 436668 | 436996 | + | Target "Motif:SIRE3_TC" 504 774 |
| 4 | 438707 | 439035 | + | Target "Motif:SIRE3_TC" 504 774 |
| 4 | 440750 | 441078 | + | Target "Motif:SIRE3_TC" 504 774 |
| 4 | 442792 | 443120 | + | Target "Motif:SIRE3_TC" 504 774 |
| 4 | 444835 | 445163 | + | Target "Motif:SIRE3_TC" 504 774 |
| 4 | 446876 | 447204 | + | Target "Motif:SIRE3_TC" 504 774 |
| 4 | 448917 | 449244 | + | Target "Motif:SIRE3_TC" 504 774 |
| 4 | 450958 | 451408 | + | Target "Motif:SIRE3_TC" 504 774 |
| 4 | 452990 | 453316 | + | Target "Motif:SIRE3_TC" 504 774 |
| 4 | 455015 | 455299 | + | Target "Motif:SIRE3_TC" 504 774 |
| 4 | 463089 | 463539 | + | Target "Motif:SIRE3_TC" 504 774 |
| 4 | 493696 | 494146 | + | Target "Motif:SIRE3_TC" 504 774 |
| 4 | 562605 | 562726 | + | Target "Motif:SIRE" 97 220      |
| 4 | 572534 | 572747 | + | Target "Motif:SIRE" 97 315      |
| 4 | 572970 | 573012 | + | Target "Motif:SIRE" 101 146     |
| 4 | 577639 | 578129 | + | Target "Motif:SIRE3_TC" 480 836 |
| 4 | 594250 | 594427 | + | Target "Motif:SIRE" 98 281      |
| 4 | 627733 | 628207 | + | Target "Motif:SIRE3_TC" 492 920 |
| 4 | 653561 | 653836 | + | Target "Motif:SIRE3_TC" 667 920 |
| 4 | 726019 | 726522 | + | Target "Motif:SIRE3_TC" 480 779 |
| 4 | 738284 | 738788 | + | Target "Motif:SIRE3_TC" 480 771 |
| 4 | 762204 | 762708 | - | Target "Motif:SIRE3_TC" 480 771 |
| 4 | 780131 | 780184 | + | Target "Motif:SIRE" 91 146      |
| 4 | 808867 | 809375 | + | Target "Motif:SIRE3_TC" 480 771 |
| 4 | 816365 | 816726 | + | Target "Motif:SIRE3_TC" 491 779 |
| 4 | 837681 | 838043 | - | Target "Motif:SIRE3_TC" 491 779 |
| 4 | 851609 | 852117 | - | Target "Motif:SIRE3_TC" 480 771 |
| 4 | 859137 | 859643 | - | Target "Motif:SIRE3_TC" 480 771 |
| 4 | 864722 | 865077 | - | Target "Motif:SIRE3_TC" 495 779 |
| 4 | 872112 | 872171 | - | Target "Motif:SIRE" 45 101      |
| 4 | 872171 | 872598 | - | Target "Motif:SIRE3_TC" 480 771 |
| 4 | 882617 | 882979 | - | Target "Motif:SIRE3_TC" 491 779 |
| 4 | 889972 | 890474 | - | Target "Motif:SIRE3_TC" 480 771 |
| 4 | 898707 | 899067 | - | Target "Motif:SIRE3_TC" 491 779 |
| 4 | 906088 | 906602 | - | Target "Motif:SIRE3_TC" 480 774 |
| 4 | 920529 | 920960 | - | Target "Motif:SIRE3_TC" 511 918 |
| 4 | 920761 | 920963 | - | Target "Motif:SIRE" 98 312      |
| 4 | 942867 | 943309 | - | Target "Motif:SIRE3_TC" 511 918 |
| 4 | 978520 | 978961 | - | Target "Motif:SIRE3_TC" 511 918 |

|    |         |         |   |                                 |
|----|---------|---------|---|---------------------------------|
| 4  | 995398  | 995837  | - | Target "Motif:SIRE3_TC" 511 918 |
| 4  | 1037780 | 1038223 | - | Target "Motif:SIRE3_TC" 511 918 |
| 4  | 1093491 | 1093826 | + | Target "Motif:SIRE3_TC" 504 828 |
| 4  | 1244863 | 1245196 | - | Target "Motif:SIRE3_TC" 504 828 |
| 4  | 1254059 | 1254396 | - | Target "Motif:SIRE3_TC" 504 828 |
| 4  | 1280991 | 1281329 | - | Target "Motif:SIRE3_TC" 503 838 |
| 4  | 1283081 | 1283553 | - | Target "Motif:SIRE3_TC" 468 920 |
| 4  | 1289182 | 1289635 | - | Target "Motif:SIRE3_TC" 494 920 |
| 4  | 1392161 | 1392625 | - | Target "Motif:SIRE3_TC" 491 920 |
| 4  | 1433865 | 1434202 | + | Target "Motif:SIRE3_TC" 505 828 |
| 4  | 1437187 | 1437525 | + | Target "Motif:SIRE3_TC" 505 828 |
| 4  | 1440517 | 1440855 | + | Target "Motif:SIRE3_TC" 505 828 |
| 4  | 1443849 | 1444187 | + | Target "Motif:SIRE3_TC" 505 828 |
| 4  | 1447174 | 1447512 | + | Target "Motif:SIRE3_TC" 505 828 |
| 4  | 1450500 | 1450837 | + | Target "Motif:SIRE3_TC" 505 828 |
| 4  | 1453828 | 1454166 | + | Target "Motif:SIRE3_TC" 505 828 |
| 4  | 1467933 | 1467982 | + | Target "Motif:SIRE" 95 144      |
| 4  | 1529620 | 1529950 | + | Target "Motif:SIRE3_TC" 502 822 |
| 40 | 28      | 299     | - | Target "Motif:SIRE3_TC" 504 777 |
| 40 | 2293    | 2617    | - | Target "Motif:SIRE3_TC" 504 830 |
| 40 | 4525    | 4941    | - | Target "Motif:SIRE3_TC" 504 919 |
| 40 | 6933    | 7256    | - | Target "Motif:SIRE3_TC" 504 830 |
| 40 | 15362   | 15771   | - | Target "Motif:SIRE3_TC" 504 919 |
| 40 | 17664   | 18083   | - | Target "Motif:SIRE3_TC" 504 919 |
| 40 | 20000   | 20420   | - | Target "Motif:SIRE3_TC" 504 919 |
| 40 | 22324   | 22740   | - | Target "Motif:SIRE3_TC" 504 919 |
| 40 | 24643   | 24936   | - | Target "Motif:SIRE3_TC" 637 919 |
| 40 | 24855   | 25000   | - | Target "Motif:SIRE" 167 313     |
| 40 | 37796   | 38178   | - | Target "Motif:SIRE3_TC" 577 920 |
| 40 | 38294   | 38402   | - | Target "Motif:SIRE" 98 207      |
| 40 | 40277   | 40700   | - | Target "Motif:SIRE3_TC" 504 919 |
| 40 | 42617   | 43037   | - | Target "Motif:SIRE3_TC" 504 919 |
| 40 | 46179   | 46598   | - | Target "Motif:SIRE3_TC" 504 919 |
| 40 | 48521   | 48941   | - | Target "Motif:SIRE3_TC" 504 919 |
| 40 | 50860   | 51281   | - | Target "Motif:SIRE3_TC" 504 919 |
| 40 | 53206   | 53627   | - | Target "Motif:SIRE3_TC" 504 919 |
| 40 | 55545   | 55966   | - | Target "Motif:SIRE3_TC" 504 919 |
| 40 | 57885   | 58307   | - | Target "Motif:SIRE3_TC" 504 919 |
| 40 | 60167   | 60497   | - | Target "Motif:SIRE3_TC" 504 830 |
| 40 | 62412   | 62832   | - | Target "Motif:SIRE3_TC" 504 919 |
| 40 | 64745   | 65165   | - | Target "Motif:SIRE3_TC" 504 919 |
| 40 | 67166   | 67495   | - | Target "Motif:SIRE3_TC" 504 830 |
| 40 | 69402   | 69820   | - | Target "Motif:SIRE3_TC" 504 919 |
| 40 | 74559   | 74979   | - | Target "Motif:SIRE3_TC" 504 919 |
| 40 | 76896   | 77316   | - | Target "Motif:SIRE3_TC" 504 919 |
| 40 | 85775   | 85928   | + | Target "Motif:SIRE" 159 313     |
