# Supplementary material for: Repeat-Driven Generation of Antigenic Diversity in a Major Human Pathogen, Trypanosoma cruzi
Source: PubMed Central journal article supplement (PMC7966520; doi:10.3389/fcimb.2021.614665), 2021-03-03
Supplement: DataSheet_5.pdf [file DataSheet_5.pdf]

Supplementary table 4, part 2.

|    |        |        |   |                                 |
|----|--------|--------|---|---------------------------------|
| 40 | 85849  | 86049  | + | Target "Motif:SIRE3_TC" 637 830 |
| 40 | 87659  | 88080  | + | Target "Motif:SIRE3_TC" 504 919 |
| 40 | 90002  | 90423  | + | Target "Motif:SIRE3_TC" 504 919 |
| 40 | 92345  | 92766  | + | Target "Motif:SIRE3_TC" 504 919 |
| 40 | 94687  | 95107  | + | Target "Motif:SIRE3_TC" 504 919 |
| 40 | 97028  | 97450  | + | Target "Motif:SIRE3_TC" 504 919 |
| 40 | 100228 | 100375 | + | Target "Motif:SIRE" 159 313     |
| 40 | 100299 | 100494 | + | Target "Motif:SIRE3_TC" 637 830 |
| 40 | 102488 | 102901 | + | Target "Motif:SIRE3_TC" 504 919 |
| 40 | 104806 | 105221 | + | Target "Motif:SIRE3_TC" 504 919 |
| 40 | 107128 | 107546 | + | Target "Motif:SIRE3_TC" 504 919 |
| 40 | 109465 | 109886 | + | Target "Motif:SIRE3_TC" 504 919 |
| 40 | 111809 | 112230 | + | Target "Motif:SIRE3_TC" 504 919 |
| 40 | 114154 | 114575 | + | Target "Motif:SIRE3_TC" 504 919 |
| 40 | 116496 | 116917 | + | Target "Motif:SIRE3_TC" 504 919 |
| 40 | 118774 | 119191 | + | Target "Motif:SIRE3_TC" 505 919 |
| 40 | 121111 | 121444 | + | Target "Motif:SIRE3_TC" 504 830 |
| 40 | 125131 | 125551 | + | Target "Motif:SIRE3_TC" 504 919 |
| 40 | 127468 | 127889 | + | Target "Motif:SIRE3_TC" 504 919 |
| 40 | 129810 | 130231 | + | Target "Motif:SIRE3_TC" 504 919 |
| 40 | 132154 | 132575 | + | Target "Motif:SIRE3_TC" 504 919 |
| 40 | 134496 | 134916 | + | Target "Motif:SIRE3_TC" 504 919 |
| 40 | 136835 | 137256 | + | Target "Motif:SIRE3_TC" 504 919 |
| 40 | 139193 | 139426 | + | Target "Motif:SIRE3_TC" 504 740 |
| 40 | 139426 | 139665 | + | Target "Motif:SIRE3_TC" 691 919 |
| 40 | 143594 | 143867 | + | Target "Motif:SIRE3_TC" 561 830 |
| 40 | 145848 | 146178 | + | Target "Motif:SIRE3_TC" 504 830 |
| 40 | 148177 | 148595 | + | Target "Motif:SIRE3_TC" 504 919 |
| 40 | 150476 | 150896 | + | Target "Motif:SIRE3_TC" 504 919 |
| 40 | 152812 | 153233 | + | Target "Motif:SIRE3_TC" 504 919 |
| 40 | 155151 | 155572 | + | Target "Motif:SIRE3_TC" 504 919 |
| 40 | 157489 | 157908 | + | Target "Motif:SIRE3_TC" 504 919 |
| 40 | 159822 | 160242 | + | Target "Motif:SIRE3_TC" 504 919 |
| 40 | 162162 | 162583 | + | Target "Motif:SIRE3_TC" 504 919 |
| 40 | 164505 | 164925 | + | Target "Motif:SIRE3_TC" 504 919 |
| 40 | 166845 | 167266 | + | Target "Motif:SIRE3_TC" 504 919 |
| 40 | 169189 | 169609 | + | Target "Motif:SIRE3_TC" 504 919 |
| 40 | 171526 | 171946 | + | Target "Motif:SIRE3_TC" 504 919 |
| 40 | 173807 | 173914 | + | Target "Motif:SIRE" 98 207      |
| 40 | 174028 | 174403 | + | Target "Motif:SIRE3_TC" 318 920 |
| 40 | 184795 | 185232 | + | Target "Motif:SIRE3_TC" 504 919 |
| 40 | 187111 | 187529 | + | Target "Motif:SIRE3_TC" 504 919 |
| 40 | 189380 | 189489 | + | Target "Motif:SIRE" 98 207      |
| 40 | 189605 | 189954 | + | Target "Motif:SIRE3_TC" 312 920 |
| 40 | 196618 | 196720 | + | Target "Motif:SIRE" 98 201      |
| 40 | 196852 | 197219 | + | Target "Motif:SIRE3_TC" 320 920 |

|    |        |        |   |                                 |
|----|--------|--------|---|---------------------------------|
| 40 | 246540 | 246811 | - | Target "Motif:SIRE3_TC" 685 919 |
| 40 | 251181 | 251227 | - | Target "Motif:SIRE" 98 145      |
| 40 | 251224 | 251404 | - | Target "Motif:SIRE" 95 281      |
| 40 | 253328 | 253748 | - | Target "Motif:SIRE3_TC" 504 919 |
| 40 | 255671 | 256092 | - | Target "Motif:SIRE3_TC" 504 919 |
| 40 | 258017 | 258438 | - | Target "Motif:SIRE3_TC" 504 919 |
| 40 | 260362 | 260782 | - | Target "Motif:SIRE3_TC" 504 919 |
| 40 | 262704 | 263121 | - | Target "Motif:SIRE3_TC" 504 919 |
| 40 | 265026 | 265448 | - | Target "Motif:SIRE3_TC" 504 919 |
| 40 | 267558 | 267674 | - | Target "Motif:SIRE3_TC" 835 920 |
| 40 | 267701 | 268044 | - | Target "Motif:SIRE3_TC" 504 834 |
| 40 | 271785 | 272234 | - | Target "Motif:SIRE3_TC" 504 919 |
| 40 | 274150 | 274571 | - | Target "Motif:SIRE3_TC" 504 919 |
| 40 | 276491 | 276910 | - | Target "Motif:SIRE3_TC" 504 919 |
| 40 | 278832 | 279254 | - | Target "Motif:SIRE3_TC" 504 919 |
| 40 | 280773 | 281062 | - | Target "Motif:SIRE3_TC" 637 919 |
| 40 | 280982 | 281136 | - | Target "Motif:SIRE" 159 313     |
| 40 | 286130 | 286551 | - | Target "Motif:SIRE3_TC" 504 919 |
| 40 | 288473 | 288894 | - | Target "Motif:SIRE3_TC" 504 919 |
| 40 | 290818 | 291237 | - | Target "Motif:SIRE3_TC" 504 919 |
| 40 | 297963 | 298384 | - | Target "Motif:SIRE3_TC" 504 919 |
| 40 | 300300 | 300720 | - | Target "Motif:SIRE3_TC" 504 919 |
| 40 | 302637 | 303057 | - | Target "Motif:SIRE3_TC" 504 919 |
| 40 | 304976 | 305400 | - | Target "Motif:SIRE3_TC" 504 919 |
| 40 | 307317 | 307738 | - | Target "Motif:SIRE3_TC" 504 919 |
| 40 | 317423 | 317841 | - | Target "Motif:SIRE3_TC" 504 919 |
| 40 | 319757 | 320178 | - | Target "Motif:SIRE3_TC" 504 919 |
| 40 | 322094 | 322516 | - | Target "Motif:SIRE3_TC" 504 919 |
| 40 | 324431 | 324850 | - | Target "Motif:SIRE3_TC" 504 919 |
| 40 | 326759 | 327180 | - | Target "Motif:SIRE3_TC" 504 919 |
| 40 | 329097 | 329519 | - | Target "Motif:SIRE3_TC" 504 919 |
| 40 | 332437 | 332857 | - | Target "Motif:SIRE3_TC" 504 919 |
| 40 | 334772 | 335193 | - | Target "Motif:SIRE3_TC" 504 919 |
| 40 | 336709 | 336998 | - | Target "Motif:SIRE3_TC" 637 919 |
| 40 | 336918 | 337072 | - | Target "Motif:SIRE" 159 313     |
| 40 | 345554 | 345974 | + | Target "Motif:SIRE3_TC" 504 919 |
| 40 | 347892 | 348312 | + | Target "Motif:SIRE3_TC" 504 919 |
| 40 | 350224 | 350553 | + | Target "Motif:SIRE3_TC" 504 830 |
| 40 | 351988 | 352410 | + | Target "Motif:SIRE3_TC" 504 919 |
| 40 | 354286 | 354703 | + | Target "Motif:SIRE3_TC" 504 919 |
| 40 | 356593 | 357010 | + | Target "Motif:SIRE3_TC" 504 916 |
| 40 | 358895 | 359311 | + | Target "Motif:SIRE3_TC" 504 919 |
| 40 | 361214 | 361540 | + | Target "Motif:SIRE3_TC" 504 830 |
| 40 | 377484 | 377907 | + | Target "Motif:SIRE3_TC" 504 919 |
| 40 | 379826 | 380249 | + | Target "Motif:SIRE3_TC" 504 919 |
| 40 | 381959 | 382381 | + | Target "Motif:SIRE3_TC" 504 919 |

|    |        |        |   |                                 |
|----|--------|--------|---|---------------------------------|
| 40 | 384300 | 384718 | + | Target "Motif:SIRE3_TC" 504 919 |
| 40 | 386624 | 387041 | + | Target "Motif:SIRE3_TC" 504 919 |
| 40 | 388953 | 389390 | + | Target "Motif:SIRE3_TC" 504 830 |
| 40 | 391290 | 391707 | + | Target "Motif:SIRE3_TC" 504 919 |
| 40 | 393625 | 394029 | + | Target "Motif:SIRE3_TC" 504 919 |
| 40 | 395795 | 396217 | + | Target "Motif:SIRE3_TC" 504 919 |
| 40 | 398131 | 398551 | + | Target "Motif:SIRE3_TC" 504 919 |
| 40 | 400467 | 400889 | + | Target "Motif:SIRE3_TC" 504 919 |
| 40 | 402769 | 402876 | + | Target "Motif:SIRE" 98 207      |
| 40 | 402991 | 403368 | + | Target "Motif:SIRE3_TC" 318 920 |
| 41 | 135274 | 135707 | - | Target "Motif:SIRE3_TC" 505 911 |
| 41 | 188080 | 188112 | + | Target "Motif:SIRE3_TC" 647 682 |
| 41 | 188145 | 188392 | + | Target "Motif:SIRE3_TC" 683 919 |
| 41 | 277256 | 277323 | + | Target "Motif:SIRE3_TC" 706 771 |
| 41 | 277467 | 277537 | + | Target "Motif:SIRE" 35 101      |
| 42 | 30628  | 30976  | - | Target "Motif:SIRE3_TC" 510 838 |
| 42 | 37059  | 37406  | - | Target "Motif:SIRE3_TC" 510 838 |
| 42 | 102039 | 102496 | - | Target "Motif:SIRE3_TC" 474 920 |
| 42 | 138919 | 139125 | - | Target "Motif:SIRE" 95 297      |
| 42 | 145404 | 145609 | - | Target "Motif:SIRE" 94 293      |
| 42 | 160559 | 160631 | - | Target "Motif:SIRE" 33 102      |
| 42 | 168384 | 168840 | - | Target "Motif:SIRE3_TC" 474 920 |
| 42 | 321704 | 322186 | - | Target "Motif:SIRE3_TC" 471 920 |
| 42 | 323013 | 323496 | - | Target "Motif:SIRE3_TC" 471 920 |
| 42 | 324321 | 324804 | - | Target "Motif:SIRE3_TC" 471 920 |
| 42 | 325631 | 326114 | - | Target "Motif:SIRE3_TC" 471 920 |
| 42 | 326944 | 327427 | - | Target "Motif:SIRE3_TC" 471 920 |
| 42 | 328260 | 328742 | - | Target "Motif:SIRE3_TC" 471 920 |
| 42 | 329565 | 330047 | - | Target "Motif:SIRE3_TC" 471 920 |
| 42 | 330873 | 331314 | - | Target "Motif:SIRE3_TC" 504 920 |
| 42 | 338802 | 338989 | - | Target "Motif:SIRE3_TC" 645 832 |
| 42 | 388009 | 388218 | - | Target "Motif:SIRE" 98 282      |
| 42 | 390608 | 390797 | - | Target "Motif:SIRE3_TC" 645 834 |
| 42 | 405784 | 405859 | - | Target "Motif:SIRE7_TC" 612 682 |
| 42 | 406063 | 406337 | - | Target "Motif:SIRE3_TC" 502 771 |
| 42 | 447134 | 447473 | + | Target "Motif:SIRE3_TC" 471 771 |
| 42 | 448730 | 449162 | + | Target "Motif:SIRE3_TC" 504 920 |
| 42 | 449583 | 450043 | + | Target "Motif:SIRE3_TC" 469 836 |
| 42 | 461447 | 461777 | + | Target "Motif:SIRE3_TC" 471 771 |
| 42 | 463026 | 463446 | + | Target "Motif:SIRE3_TC" 504 920 |
| 42 | 463856 | 464192 | + | Target "Motif:SIRE3_TC" 511 837 |
| 42 | 468902 | 469218 | + | Target "Motif:SIRE3_TC" 468 771 |
| 42 | 470473 | 470904 | + | Target "Motif:SIRE3_TC" 257 911 |
| 42 | 471317 | 471777 | + | Target "Motif:SIRE3_TC" 469 836 |
| 42 | 677621 | 677907 | + | Target "Motif:SIRE3_TC" 524 771 |
| 42 | 679161 | 679587 | + | Target "Motif:SIRE3_TC" 504 920 |

|    |        |        |   |                                   |
|----|--------|--------|---|-----------------------------------|
| 42 | 680003 | 680224 | + | Target "Motif:SIRE" 95 315        |
| 42 | 680009 | 680331 | + | Target "Motif:SIRE3_TC" 511 774   |
| 42 | 680380 | 680506 | + | Target "Motif:SIRE3_TC" 4269 4386 |
| 42 | 702676 | 703157 | + | Target "Motif:SIRE3_TC" 471 920   |
| 42 | 703994 | 704469 | + | Target "Motif:SIRE3_TC" 394 920   |
| 42 | 705284 | 705764 | + | Target "Motif:SIRE3_TC" 471 920   |
| 42 | 706582 | 707072 | + | Target "Motif:SIRE3_TC" 394 920   |
| 42 | 707887 | 708354 | + | Target "Motif:SIRE3_TC" 471 920   |
| 42 | 709171 | 709624 | + | Target "Motif:SIRE3_TC" 471 920   |
| 42 | 709583 | 709635 | + | Target "Motif:SIRE" 31 83         |
| 42 | 710468 | 710948 | + | Target "Motif:SIRE3_TC" 471 920   |
| 42 | 711771 | 712249 | + | Target "Motif:SIRE3_TC" 471 920   |
| 42 | 713068 | 713556 | + | Target "Motif:SIRE3_TC" 394 920   |
| 42 | 714364 | 714616 | + | Target "Motif:SIRE3_TC" 394 900   |
| 42 | 717725 | 718002 | + | Target "Motif:SIRE3_TC" 667 920   |
| 42 | 718831 | 719311 | + | Target "Motif:SIRE3_TC" 471 920   |
| 42 | 720106 | 720587 | + | Target "Motif:SIRE3_TC" 471 920   |
| 42 | 721384 | 721863 | + | Target "Motif:SIRE3_TC" 471 920   |
| 42 | 722661 | 723140 | + | Target "Motif:SIRE3_TC" 471 920   |
| 42 | 723945 | 724428 | + | Target "Motif:SIRE3_TC" 471 920   |
| 42 | 726393 | 726871 | + | Target "Motif:SIRE3_TC" 471 920   |
| 42 | 727726 | 727904 | + | Target "Motif:SIRE" 95 280        |
| 42 | 729026 | 729507 | + | Target "Motif:SIRE3_TC" 471 920   |
| 42 | 730335 | 730816 | + | Target "Motif:SIRE3_TC" 471 920   |
| 42 | 731638 | 732128 | + | Target "Motif:SIRE3_TC" 394 920   |
| 42 | 732945 | 733427 | + | Target "Motif:SIRE3_TC" 471 920   |
| 42 | 734246 | 734726 | + | Target "Motif:SIRE3_TC" 471 920   |
| 42 | 735551 | 736040 | + | Target "Motif:SIRE3_TC" 394 920   |
| 42 | 736830 | 737310 | + | Target "Motif:SIRE3_TC" 471 920   |
| 42 | 738139 | 738622 | + | Target "Motif:SIRE3_TC" 471 920   |
| 42 | 739494 | 739643 | + | Target "Motif:SIRE" 95 253        |
| 42 | 740639 | 740926 | + | Target "Motif:SIRE3_TC" 394 920   |
| 42 | 741749 | 742229 | + | Target "Motif:SIRE3_TC" 471 920   |
| 42 | 743053 | 743533 | + | Target "Motif:SIRE3_TC" 471 920   |
| 42 | 744358 | 744840 | + | Target "Motif:SIRE3_TC" 471 920   |
| 42 | 745662 | 746143 | + | Target "Motif:SIRE3_TC" 471 920   |
| 42 | 746972 | 747454 | + | Target "Motif:SIRE3_TC" 471 920   |
| 42 | 748282 | 748769 | + | Target "Motif:SIRE3_TC" 394 920   |
| 42 | 749589 | 750093 | + | Target "Motif:SIRE3_TC" 322 920   |
| 42 | 827356 | 827405 | + | Target "Motif:SIRE" 95 141        |
| 43 | 76228  | 76529  | + | Target "Motif:SIRE3_TC" 510 771   |
| 43 | 88538  | 88809  | + | Target "Motif:SIRE3_TC" 518 772   |
| 43 | 89122  | 89336  | + | Target "Motif:SIRE" 95 315        |
| 43 | 89153  | 89581  | + | Target "Motif:SIRE7_TC" 257 696   |
| 43 | 109757 | 110033 | + | Target "Motif:SIRE3_TC" 513 772   |
| 43 | 116215 | 116627 | + | Target "Motif:SIRE3_TC" 511 908   |

|    |        |        |   |                             |
|----|--------|--------|---|-----------------------------|
| 43 | 123417 | 123474 | - | Target "Motif:SIRE" 91 147  |
| 43 | 241728 | 241753 | - | Target "Motif:SIRE" 284 307 |
| 43 | 241789 | 241968 | - | Target "Motif:SIRE" 96 283  |
| 43 | 245587 | 245612 | - | Target "Motif:SIRE" 284 307 |
| 43 | 245648 | 245826 | - | Target "Motif:SIRE" 96 283  |
| 43 | 249434 | 249462 | - | Target "Motif:SIRE" 285 312 |
| 43 | 249498 | 249677 | - | Target "Motif:SIRE" 96 284  |
| 43 | 253567 | 253746 | - | Target "Motif:SIRE" 95 281  |
| 43 | 257409 | 257591 | - | Target "Motif:SIRE" 95 281  |
| 43 | 261210 | 261235 | - | Target "Motif:SIRE" 284 307 |
| 43 | 261265 | 261444 | - | Target "Motif:SIRE" 96 283  |
| 43 | 265062 | 265087 | - | Target "Motif:SIRE" 284 307 |
| 43 | 265122 | 265301 | - | Target "Motif:SIRE" 96 283  |
| 43 | 269840 | 269865 | - | Target "Motif:SIRE" 284 307 |
| 43 | 269899 | 270078 | - | Target "Motif:SIRE" 96 283  |
| 43 | 273724 | 273908 | - | Target "Motif:SIRE" 95 283  |
| 43 | 277521 | 277541 | - | Target "Motif:SIRE" 284 303 |
| 43 | 277576 | 277755 | - | Target "Motif:SIRE" 96 283  |
| 43 | 281365 | 281390 | - | Target "Motif:SIRE" 284 307 |
| 43 | 281426 | 281604 | - | Target "Motif:SIRE" 96 283  |
| 43 | 285212 | 285237 | - | Target "Motif:SIRE" 284 307 |
| 43 | 285272 | 285447 | - | Target "Motif:SIRE" 96 283  |
| 43 | 290928 | 291144 | - | Target "Motif:SIRE" 95 303  |
| 43 | 294716 | 294738 | - | Target "Motif:SIRE" 282 303 |
| 43 | 294764 | 294946 | - | Target "Motif:SIRE" 96 281  |
| 43 | 298525 | 298550 | - | Target "Motif:SIRE" 284 307 |
| 43 | 298585 | 298761 | - | Target "Motif:SIRE" 96 283  |
| 43 | 302360 | 302589 | - | Target "Motif:SIRE" 95 307  |
| 43 | 306194 | 306421 | - | Target "Motif:SIRE" 95 307  |
| 43 | 310789 | 310968 | - | Target "Motif:SIRE" 95 278  |
| 43 | 314588 | 314612 | - | Target "Motif:SIRE" 284 307 |
| 43 | 314648 | 314827 | - | Target "Motif:SIRE" 96 283  |
| 43 | 318447 | 318472 | - | Target "Motif:SIRE" 284 307 |
| 43 | 318502 | 318680 | - | Target "Motif:SIRE" 96 283  |
| 43 | 322304 | 322524 | - | Target "Motif:SIRE" 95 303  |
| 43 | 326143 | 326168 | - | Target "Motif:SIRE" 284 307 |
| 43 | 326198 | 326377 | - | Target "Motif:SIRE" 96 283  |
| 43 | 329952 | 330180 | - | Target "Motif:SIRE" 95 307  |
| 43 | 333793 | 333818 | - | Target "Motif:SIRE" 284 307 |
| 43 | 333848 | 334026 | - | Target "Motif:SIRE" 96 283  |
| 43 | 337642 | 337667 | - | Target "Motif:SIRE" 284 307 |
| 43 | 337703 | 337881 | - | Target "Motif:SIRE" 96 283  |
| 43 | 341501 | 341522 | - | Target "Motif:SIRE" 284 303 |
| 43 | 341558 | 341736 | - | Target "Motif:SIRE" 96 283  |
| 43 | 345356 | 345381 | - | Target "Motif:SIRE" 284 307 |
| 43 | 345411 | 345587 | - | Target "Motif:SIRE" 96 283  |

|    |        |        |   |                                 |
|----|--------|--------|---|---------------------------------|
| 43 | 349185 | 349211 | - | Target "Motif:SIRE" 282 307     |
| 43 | 349243 | 349417 | - | Target "Motif:SIRE" 96 281      |
| 43 | 353031 | 353055 | - | Target "Motif:SIRE" 284 307     |
| 43 | 353091 | 353269 | - | Target "Motif:SIRE" 96 283      |
| 43 | 356923 | 357105 | - | Target "Motif:SIRE" 95 281      |
| 43 | 360741 | 360920 | - | Target "Motif:SIRE" 95 281      |
| 43 | 365643 | 365668 | - | Target "Motif:SIRE" 284 307     |
| 43 | 365702 | 365881 | - | Target "Motif:SIRE" 96 283      |
| 43 | 369488 | 369716 | - | Target "Motif:SIRE" 95 307      |
| 43 | 373325 | 373548 | - | Target "Motif:SIRE" 95 307      |
| 43 | 377210 | 377391 | - | Target "Motif:SIRE" 95 281      |
| 43 | 379560 | 379742 | - | Target "Motif:SIRE" 95 281      |
| 43 | 385097 | 385121 | - | Target "Motif:SIRE" 284 307     |
| 43 | 385157 | 385336 | - | Target "Motif:SIRE" 96 283      |
| 43 | 388952 | 388977 | - | Target "Motif:SIRE" 284 307     |
| 43 | 389010 | 389188 | - | Target "Motif:SIRE" 96 283      |
| 43 | 392807 | 392832 | - | Target "Motif:SIRE" 284 307     |
| 43 | 392867 | 393045 | - | Target "Motif:SIRE" 96 283      |
| 43 | 396663 | 396682 | - | Target "Motif:SIRE" 285 303     |
| 43 | 396717 | 396895 | - | Target "Motif:SIRE" 96 284      |
| 43 | 400478 | 400498 | - | Target "Motif:SIRE" 284 303     |
| 43 | 400534 | 400713 | - | Target "Motif:SIRE" 96 283      |
| 43 | 404330 | 404354 | - | Target "Motif:SIRE" 284 307     |
| 43 | 404390 | 404569 | - | Target "Motif:SIRE" 96 283      |
| 43 | 408190 | 408210 | - | Target "Motif:SIRE" 284 303     |
| 43 | 408246 | 408424 | - | Target "Motif:SIRE" 96 283      |
| 43 | 412048 | 412270 | - | Target "Motif:SIRE" 95 303      |
| 43 | 415891 | 415916 | - | Target "Motif:SIRE" 284 307     |
| 43 | 415951 | 416130 | - | Target "Motif:SIRE" 96 283      |
| 43 | 419749 | 419970 | - | Target "Motif:SIRE" 95 307      |
| 43 | 423590 | 423812 | - | Target "Motif:SIRE" 95 307      |
| 44 | 10065  | 10138  | - | Target "Motif:SIRE" 33 102      |
| 44 | 19025  | 19185  | - | Target "Motif:SIRE" 119 280     |
| 44 | 47149  | 47222  | - | Target "Motif:SIRE" 33 102      |
| 44 | 51358  | 51519  | - | Target "Motif:SIRE" 119 280     |
| 44 | 89192  | 89621  | - | Target "Motif:SIRE3_TC" 510 920 |
| 44 | 324980 | 325345 | + | Target "Motif:SIRE6_TC" 534 900 |
| 44 | 325595 | 326180 | - | Target "Motif:SIRE3_TC" 347 920 |
| 44 | 326026 | 326528 | + | Target "Motif:SIRE6_TC" 399 900 |
| 44 | 326778 | 327360 | - | Target "Motif:SIRE3_TC" 347 920 |
| 44 | 327206 | 327708 | + | Target "Motif:SIRE6_TC" 399 900 |
| 44 | 327958 | 328544 | - | Target "Motif:SIRE3_TC" 347 920 |
| 44 | 328363 | 328892 | + | Target "Motif:SIRE6_TC" 371 900 |
| 44 | 329141 | 329725 | - | Target "Motif:SIRE3_TC" 347 920 |
| 44 | 329571 | 330073 | + | Target "Motif:SIRE6_TC" 399 900 |
| 44 | 330321 | 330905 | - | Target "Motif:SIRE3_TC" 347 920 |

|    |        |        |   |                                 |
|----|--------|--------|---|---------------------------------|
| 44 | 330751 | 331253 | + | Target "Motif:SIRE6_TC" 399 900 |
| 44 | 331502 | 332086 | - | Target "Motif:SIRE3_TC" 347 920 |
| 44 | 331905 | 332434 | + | Target "Motif:SIRE6_TC" 371 900 |
| 44 | 332684 | 333268 | - | Target "Motif:SIRE3_TC" 347 920 |
| 44 | 333114 | 333616 | + | Target "Motif:SIRE6_TC" 399 900 |
| 44 | 333865 | 334446 | - | Target "Motif:SIRE3_TC" 347 920 |
| 44 | 334293 | 334793 | + | Target "Motif:SIRE6_TC" 400 900 |
| 44 | 334293 | 334793 | + | Target "Motif:SIRE6_TC" 400 900 |
| 44 | 335041 | 335624 | - | Target "Motif:SIRE3_TC" 347 920 |
| 44 | 335470 | 335971 | + | Target "Motif:SIRE6_TC" 399 900 |
| 44 | 335470 | 335971 | + | Target "Motif:SIRE6_TC" 399 900 |
| 44 | 336218 | 336798 | - | Target "Motif:SIRE3_TC" 347 920 |
| 44 | 336645 | 337144 | + | Target "Motif:SIRE6_TC" 400 900 |
| 44 | 336645 | 337144 | + | Target "Motif:SIRE6_TC" 400 900 |
| 44 | 336645 | 337144 | + | Target "Motif:SIRE6_TC" 400 900 |
| 44 | 337389 | 337969 | - | Target "Motif:SIRE3_TC" 347 920 |
| 44 | 337788 | 338313 | + | Target "Motif:SIRE6_TC" 371 900 |
| 44 | 338556 | 339135 | - | Target "Motif:SIRE3_TC" 347 920 |
| 44 | 338984 | 339478 | + | Target "Motif:SIRE6_TC" 400 900 |
| 44 | 339725 | 340302 | - | Target "Motif:SIRE3_TC" 347 920 |
| 44 | 340151 | 340650 | + | Target "Motif:SIRE6_TC" 400 900 |
| 44 | 340900 | 341486 | - | Target "Motif:SIRE3_TC" 347 920 |
| 44 | 341305 | 341833 | + | Target "Motif:SIRE6_TC" 371 900 |
| 44 | 341305 | 341833 | + | Target "Motif:SIRE6_TC" 371 900 |
| 44 | 342082 | 342665 | - | Target "Motif:SIRE3_TC" 347 920 |
| 44 | 342485 | 343010 | + | Target "Motif:SIRE6_TC" 371 900 |
| 44 | 342485 | 343010 | + | Target "Motif:SIRE6_TC" 371 900 |
| 44 | 342485 | 343010 | + | Target "Motif:SIRE6_TC" 371 900 |
| 44 | 343259 | 343844 | - | Target "Motif:SIRE3_TC" 347 920 |
| 44 | 343691 | 344190 | + | Target "Motif:SIRE6_TC" 400 900 |
| 44 | 343691 | 344190 | + | Target "Motif:SIRE6_TC" 400 900 |
| 44 | 343691 | 344190 | + | Target "Motif:SIRE6_TC" 400 900 |
| 44 | 344438 | 345020 | - | Target "Motif:SIRE3_TC" 347 920 |
| 44 | 344867 | 345368 | + | Target "Motif:SIRE6_TC" 400 900 |
| 44 | 345617 | 346202 | - | Target "Motif:SIRE3_TC" 347 920 |
| 44 | 346049 | 346535 | + | Target "Motif:SIRE6_TC" 400 900 |
| 44 | 346782 | 347367 | - | Target "Motif:SIRE3_TC" 347 920 |
| 44 | 347186 | 347713 | + | Target "Motif:SIRE6_TC" 371 900 |
| 44 | 347186 | 347713 | + | Target "Motif:SIRE6_TC" 371 900 |
| 44 | 347186 | 347713 | + | Target "Motif:SIRE6_TC" 371 900 |
| 44 | 347962 | 348546 | - | Target "Motif:SIRE3_TC" 347 920 |
| 44 | 348365 | 348893 | + | Target "Motif:SIRE6_TC" 371 900 |
| 44 | 348365 | 348893 | + | Target "Motif:SIRE6_TC" 371 900 |
| 44 | 349142 | 349728 | - | Target "Motif:SIRE3_TC" 347 920 |
| 44 | 349547 | 350075 | + | Target "Motif:SIRE6_TC" 371 900 |
| 44 | 349547 | 350075 | + | Target "Motif:SIRE6_TC" 371 900 |

|    |        |        |   |                                 |
|----|--------|--------|---|---------------------------------|
| 44 | 350321 | 350902 | - | Target "Motif:SIRE3_TC" 347 920 |
| 44 | 350750 | 351248 | + | Target "Motif:SIRE6_TC" 400 900 |
| 44 | 350750 | 351248 | + | Target "Motif:SIRE6_TC" 400 900 |
| 44 | 351496 | 352076 | - | Target "Motif:SIRE3_TC" 347 920 |
| 44 | 351922 | 352422 | + | Target "Motif:SIRE6_TC" 399 900 |
| 44 | 351922 | 352422 | + | Target "Motif:SIRE6_TC" 399 900 |
| 44 | 351922 | 352422 | + | Target "Motif:SIRE6_TC" 399 900 |
| 44 | 352669 | 353249 | - | Target "Motif:SIRE3_TC" 347 920 |
| 44 | 353097 | 353594 | + | Target "Motif:SIRE6_TC" 400 900 |
| 44 | 353097 | 353594 | + | Target "Motif:SIRE6_TC" 400 900 |
| 44 | 353097 | 353594 | + | Target "Motif:SIRE6_TC" 400 900 |
| 44 | 353097 | 353594 | + | Target "Motif:SIRE6_TC" 400 900 |
| 44 | 353838 | 354414 | - | Target "Motif:SIRE3_TC" 347 920 |
| 44 | 354261 | 354747 | + | Target "Motif:SIRE6_TC" 400 891 |
| 44 | 355000 | 355571 | - | Target "Motif:SIRE3_TC" 347 920 |
| 44 | 355424 | 355913 | + | Target "Motif:SIRE6_TC" 399 900 |
| 44 | 355424 | 355913 | + | Target "Motif:SIRE6_TC" 399 900 |
| 44 | 355424 | 355913 | + | Target "Motif:SIRE6_TC" 399 900 |
| 44 | 356158 | 356731 | - | Target "Motif:SIRE3_TC" 347 920 |
| 44 | 356584 | 357074 | + | Target "Motif:SIRE6_TC" 400 900 |
| 44 | 356584 | 357074 | + | Target "Motif:SIRE6_TC" 400 900 |
| 44 | 356584 | 357074 | + | Target "Motif:SIRE6_TC" 400 900 |
| 44 | 356584 | 357074 | + | Target "Motif:SIRE6_TC" 400 900 |
| 44 | 356584 | 357074 | + | Target "Motif:SIRE6_TC" 400 900 |
| 44 | 356584 | 357074 | + | Target "Motif:SIRE6_TC" 400 900 |
| 44 | 357316 | 357881 | - | Target "Motif:SIRE3_TC" 347 920 |
| 44 | 357732 | 358209 | + | Target "Motif:SIRE6_TC" 400 900 |
| 44 | 357732 | 358209 | + | Target "Motif:SIRE6_TC" 400 900 |
| 44 | 357732 | 358209 | + | Target "Motif:SIRE6_TC" 400 900 |
| 44 | 357732 | 358209 | + | Target "Motif:SIRE6_TC" 400 900 |
| 44 | 357732 | 358209 | + | Target "Motif:SIRE6_TC" 400 900 |
| 44 | 357732 | 358209 | + | Target "Motif:SIRE6_TC" 400 900 |
| 44 | 357732 | 358209 | + | Target "Motif:SIRE6_TC" 400 900 |
| 44 | 357732 | 358209 | + | Target "Motif:SIRE6_TC" 400 900 |
| 44 | 357732 | 358209 | + | Target "Motif:SIRE6_TC" 400 900 |
| 44 | 358450 | 359031 | - | Target "Motif:SIRE3_TC" 347 920 |
| 44 | 358850 | 359379 | + | Target "Motif:SIRE6_TC" 371 900 |
| 44 | 359629 | 360215 | - | Target "Motif:SIRE3_TC" 347 920 |
| 44 | 360034 | 360557 | + | Target "Motif:SIRE6_TC" 371 900 |
| 44 | 360807 | 361392 | - | Target "Motif:SIRE3_TC" 347 920 |
| 44 | 361238 | 361740 | + | Target "Motif:SIRE6_TC" 399 900 |
| 44 | 361989 | 362574 | - | Target "Motif:SIRE3_TC" 347 920 |
| 44 | 362420 | 362922 | + | Target "Motif:SIRE6_TC" 399 900 |
| 44 | 363172 | 363756 | - | Target "Motif:SIRE3_TC" 347 920 |
| 44 | 363602 | 364104 | + | Target "Motif:SIRE6_TC" 399 900 |
| 44 | 364353 | 364938 | - | Target "Motif:SIRE3_TC" 347 920 |
| 44 | 364784 | 365286 | + | Target "Motif:SIRE6_TC" 399 900 |
| 44 | 365535 | 366119 | - | Target "Motif:SIRE3_TC" 347 920 |
| 44 | 365965 | 366467 | + | Target "Motif:SIRE6_TC" 399 900 |



|    |        |        |   |                                 |
|----|--------|--------|---|---------------------------------|
| 44 | 366716 | 367300 | - | Target "Motif:SIRE3_TC" 347 920 |
| 44 | 367147 | 367648 | + | Target "Motif:SIRE6_TC" 400 900 |
| 44 | 367897 | 368482 | - | Target "Motif:SIRE3_TC" 347 920 |
| 44 | 368328 | 368830 | + | Target "Motif:SIRE6_TC" 399 900 |
| 44 | 369079 | 369664 | - | Target "Motif:SIRE3_TC" 347 920 |
| 44 | 369510 | 370011 | + | Target "Motif:SIRE6_TC" 399 900 |
| 44 | 369510 | 370011 | + | Target "Motif:SIRE6_TC" 399 900 |
| 44 | 370261 | 370845 | - | Target "Motif:SIRE3_TC" 347 920 |
| 44 | 370691 | 371193 | + | Target "Motif:SIRE6_TC" 399 900 |
| 44 | 371442 | 372026 | - | Target "Motif:SIRE3_TC" 347 920 |
| 44 | 371872 | 372373 | + | Target "Motif:SIRE6_TC" 399 900 |
| 44 | 371872 | 372373 | + | Target "Motif:SIRE6_TC" 399 900 |
| 44 | 372622 | 373207 | - | Target "Motif:SIRE3_TC" 347 920 |
| 44 | 373053 | 373555 | + | Target "Motif:SIRE6_TC" 399 900 |
| 44 | 373804 | 374389 | - | Target "Motif:SIRE3_TC" 347 920 |
| 44 | 374235 | 374735 | + | Target "Motif:SIRE6_TC" 399 900 |
| 44 | 374984 | 375567 | - | Target "Motif:SIRE3_TC" 347 920 |
| 44 | 375413 | 375913 | + | Target "Motif:SIRE6_TC" 399 900 |
| 44 | 375413 | 375913 | + | Target "Motif:SIRE6_TC" 399 900 |
| 44 | 375413 | 375913 | + | Target "Motif:SIRE6_TC" 399 900 |
| 44 | 376161 | 376740 | - | Target "Motif:SIRE3_TC" 347 920 |
| 44 | 376589 | 377088 | + | Target "Motif:SIRE6_TC" 401 900 |
| 44 | 377338 | 377924 | - | Target "Motif:SIRE3_TC" 347 920 |
| 44 | 377743 | 378272 | + | Target "Motif:SIRE6_TC" 371 900 |
| 44 | 378522 | 379099 | - | Target "Motif:SIRE3_TC" 347 920 |
| 44 | 378949 | 379445 | + | Target "Motif:SIRE6_TC" 400 900 |
| 44 | 379694 | 380273 | - | Target "Motif:SIRE3_TC" 347 920 |
| 44 | 380119 | 380620 | + | Target "Motif:SIRE6_TC" 399 900 |
| 44 | 380869 | 381449 | - | Target "Motif:SIRE3_TC" 347 920 |
| 44 | 381295 | 381795 | + | Target "Motif:SIRE6_TC" 399 900 |
| 44 | 382045 | 382624 | - | Target "Motif:SIRE3_TC" 347 920 |
| 44 | 382470 | 382972 | + | Target "Motif:SIRE6_TC" 399 900 |
| 44 | 383221 | 383801 | - | Target "Motif:SIRE3_TC" 347 920 |
| 44 | 383647 | 384147 | + | Target "Motif:SIRE6_TC" 399 900 |
| 44 | 384395 | 384973 | - | Target "Motif:SIRE3_TC" 347 920 |
| 44 | 384783 | 385307 | + | Target "Motif:SIRE6_TC" 358 900 |
| 44 | 384783 | 385307 | + | Target "Motif:SIRE6_TC" 358 900 |
| 44 | 384783 | 385307 | + | Target "Motif:SIRE6_TC" 358 900 |
| 44 | 384783 | 385307 | + | Target "Motif:SIRE6_TC" 358 900 |
| 44 | 385544 | 386112 | - | Target "Motif:SIRE3_TC" 347 920 |
| 44 | 385934 | 386457 | + | Target "Motif:SIRE6_TC" 371 900 |
| 44 | 385934 | 386457 | + | Target "Motif:SIRE6_TC" 371 900 |
| 44 | 385934 | 386457 | + | Target "Motif:SIRE6_TC" 371 900 |
| 44 | 385934 | 386457 | + | Target "Motif:SIRE6_TC" 371 900 |
| 44 | 386707 | 387287 | - | Target "Motif:SIRE3_TC" 347 920 |
| 44 | 387133 | 387629 | + | Target "Motif:SIRE6_TC" 399 900 |

|    |        |        |   |                                 |
|----|--------|--------|---|---------------------------------|
| 44 | 387879 | 388460 | - | Target "Motif:SIRE3_TC" 347 920 |
| 44 | 388307 | 388807 | + | Target "Motif:SIRE6_TC" 399 900 |
| 44 | 389055 | 389640 | - | Target "Motif:SIRE3_TC" 347 920 |
| 44 | 389486 | 389987 | + | Target "Motif:SIRE6_TC" 399 900 |
| 44 | 390237 | 390820 | - | Target "Motif:SIRE3_TC" 347 920 |
| 44 | 390666 | 391168 | + | Target "Motif:SIRE6_TC" 399 900 |
| 44 | 391418 | 392002 | - | Target "Motif:SIRE3_TC" 347 920 |
| 44 | 391848 | 392348 | + | Target "Motif:SIRE6_TC" 399 900 |
| 44 | 392598 | 393180 | - | Target "Motif:SIRE3_TC" 347 920 |
| 44 | 393027 | 393528 | + | Target "Motif:SIRE6_TC" 400 900 |
| 44 | 393776 | 394361 | - | Target "Motif:SIRE3_TC" 347 920 |
| 44 | 394207 | 394708 | + | Target "Motif:SIRE6_TC" 399 900 |
| 44 | 394207 | 394708 | + | Target "Motif:SIRE6_TC" 399 900 |
| 44 | 394956 | 395535 | - | Target "Motif:SIRE3_TC" 347 920 |
| 44 | 395385 | 395866 | + | Target "Motif:SIRE6_TC" 399 900 |
| 44 | 396110 | 396258 | - | Target "Motif:SIRE3_TC" 779 916 |
| 44 | 403242 | 403743 | - | Target "Motif:SIRE3_TC" 347 851 |
| 44 | 403589 | 404091 | + | Target "Motif:SIRE6_TC" 399 900 |
| 44 | 404351 | 404850 | + | Target "Motif:SIRE6_TC" 400 900 |
| 44 | 405113 | 405614 | + | Target "Motif:SIRE6_TC" 400 900 |
| 44 | 405876 | 406377 | + | Target "Motif:SIRE6_TC" 400 900 |
| 44 | 406640 | 407141 | + | Target "Motif:SIRE6_TC" 400 900 |
| 44 | 407403 | 407905 | + | Target "Motif:SIRE6_TC" 400 900 |
| 44 | 408167 | 408668 | + | Target "Motif:SIRE6_TC" 400 900 |
| 44 | 408930 | 409430 | + | Target "Motif:SIRE6_TC" 400 900 |
| 45 | 9608   | 9740   | - | Target "Motif:SIRE3_TC" 834 920 |
| 45 | 9775   | 10088  | - | Target "Motif:SIRE3_TC" 506 833 |
| 45 | 57578  | 58011  | - | Target "Motif:SIRE3_TC" 502 920 |
| 45 | 276166 | 276270 | - | Target "Motif:SIRE" 98 202      |
| 45 | 285642 | 285833 | + | Target "Motif:SIRE" 119 313     |
| 45 | 343392 | 343641 | + | Target "Motif:SIRE3_TC" 529 771 |
| 46 | 186012 | 186061 | - | Target "Motif:SIRE" 95 145      |
| 46 | 224630 | 224680 | - | Target "Motif:SIRE" 94 142      |
| 46 | 351757 | 351987 | + | Target "Motif:SIRE" 94 313      |
| 46 | 357879 | 358089 | + | Target "Motif:SIRE" 95 300      |
| 46 | 366238 | 366457 | + | Target "Motif:SIRE" 95 313      |
| 46 | 366457 | 366672 | + | Target "Motif:SIRE3_TC" 359 901 |
| 47 | 194136 | 194180 | - | Target "Motif:SIRE" 101 145     |
| 47 | 204808 | 204851 | - | Target "Motif:SIRE" 101 145     |
| 47 | 205073 | 205286 | - | Target "Motif:SIRE" 97 315      |
| 47 | 216541 | 216584 | - | Target "Motif:SIRE" 100 145     |
| 47 | 245577 | 245620 | - | Target "Motif:SIRE" 99 147      |
| 47 | 315503 | 315831 | - | Target "Motif:SIRE3_TC" 504 774 |
| 47 | 319156 | 319482 | - | Target "Motif:SIRE3_TC" 504 774 |
| 47 | 344953 | 345395 | - | Target "Motif:SIRE3_TC" 504 774 |
| 47 | 347069 | 347412 | - | Target "Motif:SIRE3_TC" 504 774 |

|    |         |         |   |                                 |
|----|---------|---------|---|---------------------------------|
| 47 | 348967  | 349402  | - | Target "Motif:SIRE3_TC" 504 774 |
| 47 | 372535  | 373002  | - | Target "Motif:SIRE3_TC" 483 920 |
| 5  | 862     | 1088    | - | Target "Motif:SIRE" 95 307      |
| 5  | 4697    | 4926    | - | Target "Motif:SIRE" 95 312      |
| 5  | 8536    | 8771    | - | Target "Motif:SIRE" 95 312      |
| 5  | 12432   | 12615   | - | Target "Motif:SIRE" 95 283      |
| 5  | 18300   | 18525   | - | Target "Motif:SIRE" 95 312      |
| 5  | 22130   | 22357   | - | Target "Motif:SIRE" 95 307      |
| 5  | 25977   | 26002   | - | Target "Motif:SIRE" 284 307     |
| 5  | 26037   | 26216   | - | Target "Motif:SIRE" 96 283      |
| 5  | 29836   | 29859   | - | Target "Motif:SIRE" 284 307     |
| 5  | 29894   | 30073   | - | Target "Motif:SIRE" 96 283      |
| 5  | 108120  | 108337  | - | Target "Motif:SIRE" 98 293      |
| 5  | 246385  | 246830  | - | Target "Motif:SIRE3_TC" 504 920 |
| 5  | 431500  | 431879  | + | Target "Motif:SIRE3_TC" 395 821 |
| 5  | 520148  | 520364  | + | Target "Motif:SIRE" 95 315      |
| 5  | 520154  | 520452  | + | Target "Motif:SIRE3_TC" 511 771 |
| 5  | 527339  | 527392  | - | Target "Motif:SIRE" 95 147      |
| 5  | 765322  | 765544  | + | Target "Motif:SIRE" 102 281     |
| 5  | 765547  | 765729  | + | Target "Motif:SIRE" 95 281      |
| 5  | 779362  | 779846  | + | Target "Motif:SIRE3_TC" 390 832 |
| 5  | 779751  | 780044  | + | Target "Motif:SIRE" 31 281      |
| 5  | 780047  | 780230  | + | Target "Motif:SIRE" 95 281      |
| 5  | 786990  | 787468  | + | Target "Motif:SIRE3_TC" 390 832 |
| 5  | 787377  | 787669  | + | Target "Motif:SIRE" 31 281      |
| 5  | 787671  | 787854  | + | Target "Motif:SIRE" 95 281      |
| 5  | 825431  | 825625  | + | Target "Motif:SIRE" 97 281      |
| 5  | 825628  | 825810  | + | Target "Motif:SIRE" 95 281      |
| 5  | 838552  | 839032  | + | Target "Motif:SIRE3_TC" 390 911 |
| 5  | 838939  | 839226  | + | Target "Motif:SIRE" 31 281      |
| 5  | 839229  | 839412  | + | Target "Motif:SIRE" 95 281      |
| 5  | 852221  | 852702  | + | Target "Motif:SIRE3_TC" 390 911 |
| 5  | 852706  | 852900  | + | Target "Motif:SIRE" 97 281      |
| 5  | 852903  | 853086  | + | Target "Motif:SIRE" 95 281      |
| 5  | 1188796 | 1188982 | - | Target "Motif:SIRE" 95 281      |
| 6  | 2807    | 3024    | - | Target "Motif:SIRE" 101 313     |
| 6  | 120341  | 120661  | + | Target "Motif:SIRE3_TC" 494 771 |
| 6  | 268741  | 268787  | - | Target "Motif:SIRE" 98 145      |
| 6  | 297764  | 297810  | + | Target "Motif:SIRE" 98 146      |
| 6  | 463411  | 463724  | - | Target "Motif:SIRE3_TC" 670 920 |
| 6  | 491628  | 492144  | - | Target "Motif:SIRE3_TC" 480 836 |
| 6  | 496784  | 496828  | - | Target "Motif:SIRE" 100 145     |
| 6  | 506801  | 506843  | - | Target "Motif:SIRE" 100 146     |
| 6  | 507064  | 507276  | - | Target "Motif:SIRE" 97 315      |
| 6  | 590637  | 590964  | - | Target "Motif:SIRE3_TC" 504 774 |
| 6  | 592671  | 592999  | - | Target "Motif:SIRE3_TC" 504 774 |

|   |         |         |   |                                 |
|---|---------|---------|---|---------------------------------|
| 6 | 594699  | 595027  | - | Target "Motif:SIRE3_TC" 504 774 |
| 6 | 596734  | 597062  | - | Target "Motif:SIRE3_TC" 504 774 |
| 6 | 605963  | 606411  | - | Target "Motif:SIRE3_TC" 504 774 |
| 6 | 608121  | 608448  | - | Target "Motif:SIRE3_TC" 504 774 |
| 6 | 610033  | 610482  | - | Target "Motif:SIRE3_TC" 504 774 |
| 6 | 612197  | 612523  | - | Target "Motif:SIRE3_TC" 504 774 |
| 6 | 614271  | 614554  | - | Target "Motif:SIRE3_TC" 504 774 |
| 6 | 665690  | 666018  | - | Target "Motif:SIRE3_TC" 504 774 |
| 6 | 667733  | 668059  | - | Target "Motif:SIRE3_TC" 504 774 |
| 6 | 669649  | 670096  | - | Target "Motif:SIRE3_TC" 504 774 |
| 6 | 671851  | 672136  | - | Target "Motif:SIRE3_TC" 504 774 |
| 6 | 686822  | 687150  | - | Target "Motif:SIRE3_TC" 504 774 |
| 6 | 750735  | 751013  | - | Target "Motif:SIRE3_TC" 667 920 |
| 6 | 768858  | 769249  | - | Target "Motif:SIRE3_TC" 513 870 |
| 6 | 783002  | 783458  | - | Target "Motif:SIRE3_TC" 513 920 |
| 6 | 819020  | 819493  | - | Target "Motif:SIRE3_TC" 492 920 |
| 6 | 846551  | 846597  | - | Target "Motif:SIRE" 98 146      |
| 6 | 874090  | 874584  | + | Target "Motif:SIRE3_TC" 480 782 |
| 6 | 881351  | 881860  | + | Target "Motif:SIRE3_TC" 480 780 |
| 6 | 888853  | 889361  | + | Target "Motif:SIRE3_TC" 480 839 |
| 6 | 912902  | 913406  | - | Target "Motif:SIRE3_TC" 480 836 |
| 6 | 950518  | 951021  | + | Target "Motif:SIRE3_TC" 480 836 |
| 6 | 958032  | 958518  | + | Target "Motif:SIRE3_TC" 480 836 |
| 6 | 1283552 | 1283757 | + | Target "Motif:SIRE" 95 297      |
| 7 | 113663  | 113929  | - | Target "Motif:SIRE3_TC" 485 836 |
| 7 | 113929  | 114146  | - | Target "Motif:SIRE" 95 315      |
| 7 | 119292  | 119506  | - | Target "Motif:SIRE" 94 297      |
| 7 | 160549  | 160966  | + | Target "Motif:SIRE3_TC" 509 919 |
| 7 | 175255  | 175725  | + | Target "Motif:SIRE3_TC" 492 920 |
| 7 | 607672  | 608149  | - | Target "Motif:SIRE3_TC" 474 920 |
| 7 | 1114741 | 1115046 | + | Target "Motif:SIRE3_TC" 519 771 |
| 7 | 1174198 | 1174504 | + | Target "Motif:SIRE3_TC" 512 771 |
| 7 | 1179470 | 1179518 | - | Target "Motif:SIRE" 95 150      |
| 7 | 1308811 | 1308860 | - | Target "Motif:SIRE" 95 151      |
| 7 | 1523618 | 1523969 | - | Target "Motif:SIRE3_TC" 510 782 |
| 7 | 1597767 | 1597845 | - | Target "Motif:SIRE" 195 275     |
| 7 | 1597846 | 1597884 | - | Target "Motif:SIRE" 95 132      |
| 7 | 1658765 | 1658941 | + | Target "Motif:SIRE" 100 281     |
| 7 | 1908610 | 1908796 | - | Target "Motif:SIRE" 98 282      |
| 7 | 2093177 | 2093680 | - | Target "Motif:SIRE3_TC" 480 779 |
| 7 | 2125369 | 2125709 | - | Target "Motif:SIRE3_TC" 510 779 |
| 8 | 72459   | 72794   | - | Target "Motif:SIRE3_TC" 510 771 |
| 8 | 103282  | 103323  | + | Target "Motif:SIRE" 103 140     |
| 8 | 743583  | 743625  | + | Target "Motif:SIRE" 102 146     |
| 8 | 846719  | 846891  | + | Target "Motif:SIRE3_TC" 680 841 |
| 8 | 896195  | 896336  | + | Target "Motif:SIRE3_TC" 709 841 |

|   |         |         |   |                                 |
|---|---------|---------|---|---------------------------------|
| 8 | 910243  | 910694  | + | Target "Motif:SIRE3_TC" 494 920 |
| 8 | 919549  | 919774  | + | Target "Motif:SIRE" 94 313      |
| 8 | 919774  | 919991  | + | Target "Motif:SIRE3_TC" 506 899 |
| 8 | 929180  | 929647  | + | Target "Motif:SIRE3_TC" 394 894 |
| 8 | 932865  | 933324  | + | Target "Motif:SIRE3_TC" 394 894 |
| 8 | 936574  | 937035  | + | Target "Motif:SIRE3_TC" 394 894 |
| 8 | 940295  | 940754  | + | Target "Motif:SIRE3_TC" 260 894 |
| 8 | 944017  | 944483  | + | Target "Motif:SIRE3_TC" 394 894 |
| 8 | 947741  | 948207  | + | Target "Motif:SIRE3_TC" 394 894 |
| 8 | 951450  | 951916  | + | Target "Motif:SIRE3_TC" 394 894 |
| 8 | 955628  | 955813  | + | Target "Motif:SIRE" 94 279      |
| 8 | 967440  | 967886  | + | Target "Motif:SIRE3_TC" 501 920 |
| 8 | 1093687 | 1093997 | - | Target "Motif:SIRE3_TC" 510 771 |
| 8 | 1111458 | 1111914 | - | Target "Motif:SIRE3_TC" 257 855 |
| 9 | 7273    | 7431    | + | Target "Motif:SIRE" 105 275     |
| 9 | 88993   | 89151   | - | Target "Motif:SIRE" 105 275     |
| 9 | 103749  | 103878  | - | Target "Motif:SIRE3_TC" 508 776 |
| 9 | 103878  | 104101  | - | Target "Motif:SIRE" 98 316      |
| 9 | 122968  | 123398  | - | Target "Motif:SIRE3_TC" 509 920 |
| 9 | 313633  | 314113  | - | Target "Motif:SIRE3_TC" 491 920 |
| 9 | 338428  | 338911  | - | Target "Motif:SIRE3_TC" 491 920 |
| 9 | 370451  | 370647  | - | Target "Motif:SIRE3_TC" 725 898 |
| 9 | 388808  | 388853  | - | Target "Motif:SIRE3_TC" 503 547 |
| 9 | 500630  | 501051  | - | Target "Motif:SIRE3_TC" 504 919 |
| 9 | 502976  | 503397  | - | Target "Motif:SIRE3_TC" 504 919 |
| 9 | 505322  | 505742  | - | Target "Motif:SIRE3_TC" 504 919 |
| 9 | 507667  | 508090  | - | Target "Motif:SIRE3_TC" 504 919 |
| 9 | 510008  | 510429  | - | Target "Motif:SIRE3_TC" 504 919 |
| 9 | 512351  | 512771  | - | Target "Motif:SIRE3_TC" 504 919 |
| 9 | 514696  | 515116  | - | Target "Motif:SIRE3_TC" 504 919 |
| 9 | 517006  | 517427  | - | Target "Motif:SIRE3_TC" 504 919 |
| 9 | 519341  | 519762  | - | Target "Motif:SIRE3_TC" 504 919 |
| 9 | 521685  | 522105  | - | Target "Motif:SIRE3_TC" 504 919 |
| 9 | 524024  | 524444  | - | Target "Motif:SIRE3_TC" 504 919 |
| 9 | 526367  | 526788  | - | Target "Motif:SIRE3_TC" 504 919 |
| 9 | 539607  | 540028  | - | Target "Motif:SIRE3_TC" 504 919 |
| 9 | 541955  | 542374  | - | Target "Motif:SIRE3_TC" 504 919 |
| 9 | 544296  | 544720  | - | Target "Motif:SIRE3_TC" 504 919 |
| 9 | 546643  | 547062  | - | Target "Motif:SIRE3_TC" 504 919 |
| 9 | 548986  | 549404  | - | Target "Motif:SIRE3_TC" 504 919 |
| 9 | 551324  | 551744  | - | Target "Motif:SIRE3_TC" 504 919 |
| 9 | 553660  | 554078  | - | Target "Motif:SIRE3_TC" 504 919 |
| 9 | 555995  | 556413  | - | Target "Motif:SIRE3_TC" 504 919 |
| 9 | 558416  | 558788  | - | Target "Motif:SIRE3_TC" 474 830 |
| 9 | 560652  | 561074  | - | Target "Motif:SIRE3_TC" 504 919 |
| 9 | 564672  | 565122  | - | Target "Motif:SIRE3_TC" 504 919 |

|   |         |         |   |                                 |
|---|---------|---------|---|---------------------------------|
| 9 | 567036  | 567456  | - | Target "Motif:SIRE3_TC" 504 919 |
| 9 | 569377  | 569794  | - | Target "Motif:SIRE3_TC" 504 913 |
| 9 | 571710  | 572126  | - | Target "Motif:SIRE3_TC" 504 913 |
| 9 | 574048  | 574462  | - | Target "Motif:SIRE3_TC" 504 913 |
| 9 | 578694  | 579108  | - | Target "Motif:SIRE3_TC" 504 913 |
| 9 | 581113  | 581444  | - | Target "Motif:SIRE3_TC" 504 828 |
| 9 | 583377  | 583793  | - | Target "Motif:SIRE3_TC" 504 913 |
| 9 | 585806  | 586137  | - | Target "Motif:SIRE3_TC" 504 830 |
| 9 | 588066  | 588482  | - | Target "Motif:SIRE3_TC" 504 913 |
| 9 | 590405  | 590820  | - | Target "Motif:SIRE3_TC" 504 913 |
| 9 | 592749  | 593164  | - | Target "Motif:SIRE3_TC" 504 913 |
| 9 | 595094  | 595509  | - | Target "Motif:SIRE3_TC" 504 913 |
| 9 | 597433  | 597872  | - | Target "Motif:SIRE3_TC" 494 913 |
| 9 | 700752  | 701172  | + | Target "Motif:SIRE3_TC" 504 919 |
| 9 | 703095  | 703515  | + | Target "Motif:SIRE3_TC" 504 919 |
| 9 | 705439  | 705859  | + | Target "Motif:SIRE3_TC" 504 919 |
| 9 | 707786  | 708097  | + | Target "Motif:SIRE3_TC" 504 826 |
| 9 | 710064  | 710482  | + | Target "Motif:SIRE3_TC" 504 919 |
| 9 | 712391  | 712814  | + | Target "Motif:SIRE3_TC" 504 919 |
| 9 | 714729  | 715151  | + | Target "Motif:SIRE3_TC" 504 919 |
| 9 | 717062  | 717484  | + | Target "Motif:SIRE3_TC" 504 919 |
| 9 | 719401  | 719821  | + | Target "Motif:SIRE3_TC" 504 919 |
| 9 | 721730  | 722150  | + | Target "Motif:SIRE3_TC" 504 919 |
| 9 | 724066  | 724488  | + | Target "Motif:SIRE3_TC" 504 919 |
| 9 | 726410  | 726850  | + | Target "Motif:SIRE3_TC" 504 830 |
| 9 | 730084  | 730505  | + | Target "Motif:SIRE3_TC" 504 919 |
| 9 | 732422  | 732843  | + | Target "Motif:SIRE3_TC" 504 919 |
| 9 | 734767  | 735188  | + | Target "Motif:SIRE3_TC" 504 919 |
| 9 | 737112  | 737533  | + | Target "Motif:SIRE3_TC" 504 919 |
| 9 | 739457  | 739877  | + | Target "Motif:SIRE3_TC" 504 919 |
| 9 | 741799  | 742213  | + | Target "Motif:SIRE3_TC" 504 913 |
| 9 | 744142  | 744556  | + | Target "Motif:SIRE3_TC" 504 913 |
| 9 | 746476  | 746892  | + | Target "Motif:SIRE3_TC" 504 913 |
| 9 | 748784  | 749200  | + | Target "Motif:SIRE3_TC" 504 913 |
| 9 | 751124  | 751542  | + | Target "Motif:SIRE3_TC" 504 913 |
| 9 | 753470  | 753885  | + | Target "Motif:SIRE3_TC" 504 913 |
| 9 | 755810  | 756142  | + | Target "Motif:SIRE3_TC" 504 830 |
| 9 | 758151  | 758566  | + | Target "Motif:SIRE3_TC" 504 913 |
| 9 | 760488  | 760905  | + | Target "Motif:SIRE3_TC" 504 913 |
| 9 | 764678  | 765165  | + | Target "Motif:SIRE3_TC" 503 920 |
| 9 | 767158  | 767610  | + | Target "Motif:SIRE3_TC" 468 913 |
| 9 | 769539  | 769953  | + | Target "Motif:SIRE3_TC" 504 913 |
| 9 | 773730  | 774210  | + | Target "Motif:SIRE3_TC" 503 920 |
| 9 | 889106  | 889429  | + | Target "Motif:SIRE3_TC" 480 771 |
| 9 | 1058921 | 1059129 | + | Target "Motif:SIRE" 94 297      |
| 9 | 1110341 | 1110548 | + | Target "Motif:SIRE" 94 297      |

|   |         |         |   |                            |
|---|---------|---------|---|----------------------------|
| 9 | 1118937 | 1119142 | + | Target "Motif:SIRE" 94 297 |
|---|---------|---------|---|----------------------------|
