# Supplementary material for: Repeat-Driven Generation of Antigenic Diversity in a Major Human Pathogen, Trypanosoma cruzi
Source: PubMed Central journal article supplement (PMC7966520; doi:10.3389/fcimb.2021.614665), 2021-03-03
Supplement: DataSheet_6.pdf [file DataSheet_6.pdf]

Supplementary table 5.

| Chromosome | startR  | stopR   | strand | repeat                         |
|------------|---------|---------|--------|--------------------------------|
| 1          | 430608  | 431780  | +      | Target "Motif:L1_TC" 3641 4823 |
| 1          | 1001422 | 1003258 | +      | Target "Motif:L1_TC" 2382 4225 |
| 1          | 1001422 | 1003258 | +      | Target "Motif:L1_TC" 2382 4225 |
| 1          | 1003249 | 1003440 | +      | Target "Motif:L1_TC" 4624 4814 |
| 1          | 1008658 | 1008733 | +      | Target "Motif:L1_TC" 137 212   |
| 1          | 1031930 | 1035365 | +      | Target "Motif:L1_TC" 694 4225  |
| 1          | 1031930 | 1035365 | +      | Target "Motif:L1_TC" 694 4225  |
| 1          | 1035356 | 1035551 | +      | Target "Motif:L1_TC" 4624 4819 |
| 1          | 1058840 | 1059670 | +      | Target "Motif:L1_TC" 3395 4225 |
| 1          | 1058840 | 1059670 | +      | Target "Motif:L1_TC" 3395 4225 |
| 1          | 1059661 | 1059857 | +      | Target "Motif:L1_TC" 4624 4819 |
| 1          | 1679513 | 1679729 | -      | Target "Motif:L1_TC" 1 213     |
| 1          | 1916646 | 1916877 | +      | Target "Motif:L1_TC" 1 248     |
| 1          | 2499942 | 2500018 | -      | Target "Motif:L1_TC" 1 55      |
| 1          | 2502956 | 2503186 | -      | Target "Motif:L1_TC" 1 248     |
| 1          | 2675347 | 2680117 | +      | Target "Motif:L1_TC" 4 4815    |
| 1          | 2675347 | 2680117 | +      | Target "Motif:L1_TC" 4 4815    |
| 10         | 381843  | 383172  | -      | Target "Motif:L1_TC" 3483 4826 |
| 10         | 381843  | 383172  | -      | Target "Motif:L1_TC" 3483 4826 |
| 11         | 109985  | 114884  | -      | Target "Motif:L1_TC" 1 4831    |
| 11         | 109985  | 114884  | -      | Target "Motif:L1_TC" 1 4831    |
| 11         | 109985  | 114884  | -      | Target "Motif:L1_TC" 1 4831    |
| 11         | 197619  | 202508  | -      | Target "Motif:L1_TC" 1 4831    |
| 11         | 197619  | 202508  | -      | Target "Motif:L1_TC" 1 4831    |
| 11         | 197619  | 202508  | -      | Target "Motif:L1_TC" 1 4831    |
| 11         | 197619  | 202508  | -      | Target "Motif:L1_TC" 1 4831    |
| 11         | 259362  | 264081  | +      | Target "Motif:L1_TC" 2 4821    |
| 11         | 259362  | 264081  | +      | Target "Motif:L1_TC" 2 4821    |
| 11         | 268396  | 273114  | -      | Target "Motif:L1_TC" 2 4818    |
| 11         | 268396  | 273114  | -      | Target "Motif:L1_TC" 2 4818    |
| 11         | 268396  | 273114  | -      | Target "Motif:L1_TC" 2 4818    |
| 11         | 1009721 | 1014428 | +      | Target "Motif:L1_TC" 1 4817    |
| 11         | 1009721 | 1014428 | +      | Target "Motif:L1_TC" 1 4817    |
| 11         | 1009721 | 1014428 | +      | Target "Motif:L1_TC" 1 4817    |
| 11         | 1009721 | 1014428 | +      | Target "Motif:L1_TC" 1 4817    |
| 11         | 1022495 | 1027206 | +      | Target "Motif:L1_TC" 1 4817    |
| 12         | 11016   | 11233   | +      | Target "Motif:L1_TC" 1 219     |
| 12         | 18312   | 18531   | +      | Target "Motif:L1_TC" 1 219     |
| 12         | 942743  | 947477  | -      | Target "Motif:L1_TC" 139 4821  |
| 12         | 942743  | 947477  | -      | Target "Motif:L1_TC" 139 4821  |
| 12         | 942743  | 947477  | -      | Target "Motif:L1_TC" 139 4821  |
| 13         | 9258    | 9477    | +      | Target "Motif:L1_TC" 1 219     |

|    |        |        |   |                                |
|----|--------|--------|---|--------------------------------|
| 13 | 141400 | 146029 | - | Target "Motif:L1_TC" 1 4820    |
| 13 | 141400 | 146029 | - | Target "Motif:L1_TC" 1 4820    |
| 13 | 141400 | 146029 | - | Target "Motif:L1_TC" 1 4820    |
| 13 | 181360 | 185978 | - | Target "Motif:L1_TC" 1 4820    |
| 13 | 210763 | 215392 | + | Target "Motif:L1_TC" 1 4820    |
| 13 | 572525 | 577231 | + | Target "Motif:L1_TC" 1 4819    |
| 13 | 572525 | 577231 | + | Target "Motif:L1_TC" 1 4819    |
| 13 | 591542 | 596233 | + | Target "Motif:L1_TC" 1 4816    |
| 13 | 935561 | 940228 | + | Target "Motif:L1_TC" 1 4818    |
| 13 | 951407 | 956105 | + | Target "Motif:L1_TC" 1 4821    |
| 13 | 951407 | 956105 | + | Target "Motif:L1_TC" 1 4821    |
| 13 | 951407 | 956105 | + | Target "Motif:L1_TC" 1 4821    |
| 13 | 951407 | 956105 | + | Target "Motif:L1_TC" 1 4821    |
| 14 | 276423 | 277747 | - | Target "Motif:L1_TC" 3481 4815 |
| 14 | 419944 | 421253 | + | Target "Motif:L1_TC" 3496 4824 |
| 14 | 451996 | 456860 | - | Target "Motif:L1_TC" 1 4825    |
| 14 | 508542 | 509847 | - | Target "Motif:L1_TC" 3496 4821 |
| 14 | 548430 | 549743 | + | Target "Motif:L1_TC" 3496 4823 |
| 14 | 567042 | 568356 | + | Target "Motif:L1_TC" 3496 4816 |
| 15 | 114454 | 114684 | + | Target "Motif:L1_TC" 1 255     |
| 15 | 268014 | 268351 | - | Target "Motif:L1_TC" 4477 4815 |
| 15 | 279491 | 279810 | - | Target "Motif:L1_TC" 165 488   |
| 15 | 290295 | 290565 | - | Target "Motif:L1_TC" 4546 4820 |
| 15 | 290295 | 290565 | - | Target "Motif:L1_TC" 4546 4820 |
| 15 | 290295 | 290565 | - | Target "Motif:L1_TC" 4546 4820 |
| 15 | 290295 | 290565 | - | Target "Motif:L1_TC" 4546 4820 |
| 15 | 290557 | 290915 | - | Target "Motif:L1_TC" 3655 4049 |
| 15 | 297023 | 297242 | - | Target "Motif:L1_TC" 1 219     |
| 15 | 307262 | 312058 | - | Target "Motif:L1_TC" 1 4819    |
| 15 | 307262 | 312058 | - | Target "Motif:L1_TC" 1 4819    |
| 15 | 307262 | 312058 | - | Target "Motif:L1_TC" 1 4819    |
| 15 | 436115 | 440815 | - | Target "Motif:L1_TC" 4 4824    |
| 15 | 447695 | 448874 | - | Target "Motif:L1_TC" 3641 4821 |
| 15 | 781761 | 781976 | + | Target "Motif:L1_TC" 1 213     |
| 16 | 168555 | 168783 | + | Target "Motif:L1_TC" 1 248     |
| 16 | 358227 | 358512 | - | Target "Motif:L1_TC" 4546 4830 |
| 16 | 358505 | 358870 | - | Target "Motif:L1_TC" 3655 4048 |
| 16 | 363652 | 363929 | - | Target "Motif:L1_TC" 4546 4822 |
| 16 | 363922 | 364285 | - | Target "Motif:L1_TC" 3655 4048 |
| 16 | 368651 | 368923 | - | Target "Motif:L1_TC" 4546 4821 |
| 16 | 368915 | 372585 | - | Target "Motif:L1_TC" 180 4049  |
| 16 | 368915 | 372585 | - | Target "Motif:L1_TC" 180 4049  |
| 16 | 387900 | 388176 | - | Target "Motif:L1_TC" 4546 4822 |

|    |        |        |   |                                |
|----|--------|--------|---|--------------------------------|
| 16 | 388168 | 391842 | - | Target "Motif:L1_TC" 180 4049  |
| 16 | 405912 | 406186 | - | Target "Motif:L1_TC" 4546 4821 |
| 16 | 406178 | 409851 | - | Target "Motif:L1_TC" 180 4049  |
| 16 | 414878 | 415153 | - | Target "Motif:L1_TC" 4546 4821 |
| 16 | 415145 | 415511 | - | Target "Motif:L1_TC" 3655 4049 |
| 16 | 420825 | 421100 | - | Target "Motif:L1_TC" 4546 4821 |
| 16 | 421092 | 424768 | - | Target "Motif:L1_TC" 180 4049  |
| 16 | 443712 | 443927 | + | Target "Motif:L1_TC" 1 213     |
| 16 | 450012 | 450369 | + | Target "Motif:L1_TC" 3655 4049 |
| 16 | 450361 | 450634 | + | Target "Motif:L1_TC" 4546 4821 |
| 16 | 451879 | 455539 | + | Target "Motif:L1_TC" 180 4049  |
| 16 | 455531 | 455806 | + | Target "Motif:L1_TC" 4546 4822 |
| 16 | 476035 | 479707 | + | Target "Motif:L1_TC" 180 4049  |
| 16 | 479699 | 479984 | + | Target "Motif:L1_TC" 4546 4830 |
| 16 | 481295 | 481511 | - | Target "Motif:L1_TC" 1 213     |
| 16 | 481522 | 485970 | - | Target "Motif:L1_TC" 180 4822  |
| 16 | 481522 | 485970 | - | Target "Motif:L1_TC" 180 4822  |
| 16 | 488310 | 488621 | + | Target "Motif:L1_TC" 180 491   |
| 16 | 499728 | 500053 | + | Target "Motif:L1_TC" 4481 4815 |
| 16 | 503986 | 506375 | + | Target "Motif:L1_TC" 2388 4826 |
| 16 | 508899 | 510037 | + | Target "Motif:L1_TC" 3681 4823 |
| 16 | 510048 | 514788 | + | Target "Motif:L1_TC" 1 4823    |
| 16 | 510048 | 514788 | + | Target "Motif:L1_TC" 1 4823    |
| 16 | 514799 | 519539 | + | Target "Motif:L1_TC" 1 4823    |
| 16 | 514799 | 519539 | + | Target "Motif:L1_TC" 1 4823    |
| 16 | 514799 | 519539 | + | Target "Motif:L1_TC" 1 4823    |
| 16 | 519550 | 524290 | + | Target "Motif:L1_TC" 1 4823    |
| 16 | 519550 | 524290 | + | Target "Motif:L1_TC" 1 4823    |
| 16 | 524301 | 528596 | + | Target "Motif:L1_TC" 1 4382    |
| 16 | 533518 | 538319 | + | Target "Motif:L1_TC" 1 4826    |
| 16 | 533518 | 538319 | + | Target "Motif:L1_TC" 1 4826    |
| 16 | 533518 | 538319 | + | Target "Motif:L1_TC" 1 4826    |
| 16 | 543615 | 547887 | - | Target "Motif:L1_TC" 1 4384    |
| 16 | 548042 | 552720 | + | Target "Motif:L1_TC" 1 4819    |
| 16 | 559119 | 562822 | + | Target "Motif:L1_TC" 1016 4824 |
| 16 | 583595 | 588331 | - | Target "Motif:L1_TC" 1 4824    |
| 16 | 583595 | 588331 | - | Target "Motif:L1_TC" 1 4824    |
| 16 | 588342 | 593082 | - | Target "Motif:L1_TC" 1 4823    |
| 16 | 588342 | 593082 | - | Target "Motif:L1_TC" 1 4823    |
| 16 | 593093 | 597834 | - | Target "Motif:L1_TC" 1 4823    |
| 16 | 593093 | 597834 | - | Target "Motif:L1_TC" 1 4823    |
| 16 | 593093 | 597834 | - | Target "Motif:L1_TC" 1 4823    |
| 16 | 597845 | 602588 | - | Target "Motif:L1_TC" 1 4823    |

|    |         |         |   |                                |
|----|---------|---------|---|--------------------------------|
| 16 | 597845  | 602588  | - | Target "Motif:L1_TC" 1 4823    |
| 16 | 602599  | 607332  | - | Target "Motif:L1_TC" 1 4823    |
| 16 | 602599  | 607332  | - | Target "Motif:L1_TC" 1 4823    |
| 16 | 602599  | 607332  | - | Target "Motif:L1_TC" 1 4823    |
| 16 | 607343  | 608492  | - | Target "Motif:L1_TC" 3681 4822 |
| 16 | 608869  | 611191  | - | Target "Motif:L1_TC" 1 2256    |
| 16 | 611200  | 616076  | - | Target "Motif:L1_TC" 1 4826    |
| 16 | 616072  | 619805  | - | Target "Motif:L1_TC" 990 4827  |
| 16 | 620951  | 624651  | - | Target "Motif:L1_TC" 1 3787    |
| 16 | 624661  | 629394  | - | Target "Motif:L1_TC" 1 4823    |
| 16 | 624661  | 629394  | - | Target "Motif:L1_TC" 1 4823    |
| 16 | 629285  | 629526  | + | Target "Motif:L1_TC" 68 287    |
| 16 | 629405  | 632544  | - | Target "Motif:L1_TC" 1662 4823 |
| 16 | 642623  | 647360  | - | Target "Motif:L1_TC" 4 4821    |
| 16 | 642623  | 647360  | - | Target "Motif:L1_TC" 4 4821    |
| 16 | 642623  | 647360  | - | Target "Motif:L1_TC" 4 4821    |
| 16 | 662899  | 665324  | + | Target "Motif:L1_TC" 2388 4826 |
| 16 | 662899  | 665324  | + | Target "Motif:L1_TC" 2388 4826 |
| 16 | 671906  | 672007  | + | Target "Motif:L1_TC" 3641 3745 |
| 16 | 1125894 | 1130709 | - | Target "Motif:L1_TC" 1 4826    |
| 16 | 1125894 | 1130709 | - | Target "Motif:L1_TC" 1 4826    |
| 16 | 1125894 | 1130709 | - | Target "Motif:L1_TC" 1 4826    |
| 16 | 1125894 | 1130709 | - | Target "Motif:L1_TC" 1 4826    |
| 16 | 1284201 | 1284445 | - | Target "Motif:L1_TC" 1 248     |
| 18 | 173376  | 178061  | - | Target "Motif:L1_TC" 1 4818    |
| 18 | 173376  | 178061  | - | Target "Motif:L1_TC" 1 4818    |
| 18 | 173376  | 178061  | - | Target "Motif:L1_TC" 1 4818    |
| 18 | 180412  | 183231  | - | Target "Motif:L1_TC" 102 3010  |
| 18 | 180412  | 183231  | - | Target "Motif:L1_TC" 102 3010  |
| 18 | 183227  | 183286  | - | Target "Motif:L1_TC" 1 59      |
| 18 | 481591  | 481719  | + | Target "Motif:L1_TC" 1 103     |
| 18 | 760375  | 765171  | + | Target "Motif:L1_TC" 1 4823    |
| 19 | 4189    | 8851    | - | Target "Motif:L1_TC" 1 4820    |
| 19 | 16952   | 21571   | - | Target "Motif:L1_TC" 1 4821    |
| 19 | 16952   | 21571   | - | Target "Motif:L1_TC" 1 4821    |
| 19 | 16952   | 21571   | - | Target "Motif:L1_TC" 1 4821    |
| 19 | 36657   | 41356   | - | Target "Motif:L1_TC" 1 4822    |
| 19 | 36657   | 41356   | - | Target "Motif:L1_TC" 1 4822    |
| 19 | 43495   | 46988   | - | Target "Motif:L1_TC" 1 3679    |
| 19 | 55134   | 59753   | - | Target "Motif:L1_TC" 1 4822    |
| 19 | 55134   | 59753   | - | Target "Motif:L1_TC" 1 4822    |
| 19 | 55134   | 59753   | - | Target "Motif:L1_TC" 1 4822    |
| 19 | 67802   | 72400   | - | Target "Motif:L1_TC" 1 4822    |

|    |         |         |   |                                |
|----|---------|---------|---|--------------------------------|
| 19 | 67802   | 72400   | - | Target "Motif:L1_TC" 1 4822    |
| 19 | 67802   | 72400   | - | Target "Motif:L1_TC" 1 4822    |
| 19 | 80489   | 85096   | - | Target "Motif:L1_TC" 1 4821    |
| 19 | 80489   | 85096   | - | Target "Motif:L1_TC" 1 4821    |
| 19 | 283395  | 283615  | - | Target "Motif:L1_TC" 1 218     |
| 19 | 318551  | 323116  | + | Target "Motif:L1_TC" 154 4828  |
| 19 | 323127  | 323346  | + | Target "Motif:L1_TC" 1 218     |
| 19 | 323390  | 323750  | - | Target "Motif:L1_TC" 3643 4006 |
| 19 | 508847  | 513575  | + | Target "Motif:L1_TC" 1 4825    |
| 19 | 508847  | 513575  | + | Target "Motif:L1_TC" 1 4825    |
| 19 | 508847  | 513575  | + | Target "Motif:L1_TC" 1 4825    |
| 19 | 518184  | 518245  | + | Target "Motif:L1_TC" 4742 4802 |
| 2  | 18185   | 18590   | - | Target "Motif:L1_TC" 4417 4825 |
| 2  | 207257  | 207478  | + | Target "Motif:L1_TC" 2 219     |
| 2  | 254546  | 254609  | - | Target "Motif:L1_TC" 4 67      |
| 2  | 1634380 | 1634609 | + | Target "Motif:L1_TC" 4 248     |
| 2  | 1634639 | 1638908 | + | Target "Motif:L1_TC" 600 4815  |
| 2  | 1634639 | 1638908 | + | Target "Motif:L1_TC" 600 4815  |
| 2  | 1647166 | 1649434 | + | Target "Motif:L1_TC" 2521 4828 |
| 2  | 1649444 | 1654316 | + | Target "Motif:L1_TC" 1 4827    |
| 2  | 1649444 | 1654316 | + | Target "Motif:L1_TC" 1 4827    |
| 2  | 1654323 | 1658722 | + | Target "Motif:L1_TC" 1 4412    |
| 2  | 1660334 | 1664858 | + | Target "Motif:L1_TC" 352 4831  |
| 2  | 1660334 | 1664858 | + | Target "Motif:L1_TC" 352 4831  |
| 2  | 1660334 | 1664858 | + | Target "Motif:L1_TC" 352 4831  |
| 2  | 1664869 | 1665087 | + | Target "Motif:L1_TC" 1 218     |
| 2  | 1665154 | 1670038 | + | Target "Motif:L1_TC" 1 4831    |
| 2  | 1665154 | 1670038 | + | Target "Motif:L1_TC" 1 4831    |
| 2  | 1665154 | 1670038 | + | Target "Motif:L1_TC" 1 4831    |
| 2  | 1672216 | 1677104 | + | Target "Motif:L1_TC" 1 4827    |
| 2  | 1672216 | 1677104 | + | Target "Motif:L1_TC" 1 4827    |
| 2  | 1672216 | 1677104 | + | Target "Motif:L1_TC" 1 4827    |
| 2  | 1677115 | 1678715 | + | Target "Motif:L1_TC" 1 1612    |
| 2  | 1682670 | 1687524 | + | Target "Motif:L1_TC" 1 4827    |
| 2  | 1682670 | 1687524 | + | Target "Motif:L1_TC" 1 4827    |
| 2  | 1699517 | 1702312 | + | Target "Motif:L1_TC" 1 2739    |
| 21 | 142595  | 145945  | - | Target "Motif:L1_TC" 1391 4816 |
| 21 | 142595  | 145945  | - | Target "Motif:L1_TC" 1391 4816 |
| 21 | 150340  | 151712  | - | Target "Motif:L1_TC" 1 1390    |
| 21 | 447651  | 447871  | + | Target "Motif:L1_TC" 1 218     |
| 22 | 5341    | 8708    | - | Target "Motif:L1_TC" 1257 4778 |
| 22 | 5341    | 8708    | - | Target "Motif:L1_TC" 1257 4778 |
| 22 | 84961   | 89578   | + | Target "Motif:L1_TC" 1 4820    |

|    |        |        |   |                                |
|----|--------|--------|---|--------------------------------|
| 22 | 105292 | 109913 | + | Target "Motif:L1_TC" 1 4821    |
| 22 | 105292 | 109913 | + | Target "Motif:L1_TC" 1 4821    |
| 22 | 223249 | 226813 | + | Target "Motif:L1_TC" 1128 4822 |
| 22 | 266699 | 271309 | - | Target "Motif:L1_TC" 1 4820    |
| 22 | 319314 | 323927 | + | Target "Motif:L1_TC" 1 4821    |
| 22 | 319314 | 323927 | + | Target "Motif:L1_TC" 1 4821    |
| 22 | 328725 | 333337 | + | Target "Motif:L1_TC" 1 4821    |
| 22 | 328725 | 333337 | + | Target "Motif:L1_TC" 1 4821    |
| 22 | 338123 | 342746 | + | Target "Motif:L1_TC" 1 4820    |
| 22 | 391706 | 395814 | - | Target "Motif:L1_TC" 1 4315    |
| 22 | 539675 | 541024 | - | Target "Motif:L1_TC" 1128 2544 |
| 22 | 539675 | 541024 | - | Target "Motif:L1_TC" 1128 2544 |
| 22 | 575052 | 576371 | - | Target "Motif:L1_TC" 3483 4818 |
| 22 | 685577 | 688029 | - | Target "Motif:L1_TC" 1 2544    |
| 22 | 685577 | 688029 | - | Target "Motif:L1_TC" 1 2544    |
| 22 | 688286 | 688334 | + | Target "Motif:L1_TC" 2 49      |
| 23 | 5342   | 9855   | + | Target "Motif:L1_TC" 114 4824  |
| 23 | 72819  | 77692  | - | Target "Motif:L1_TC" 1 4824    |
| 23 | 72819  | 77692  | - | Target "Motif:L1_TC" 1 4824    |
| 23 | 340583 | 341890 | + | Target "Motif:L1_TC" 3496 4821 |
| 23 | 347879 | 349168 | + | Target "Motif:L1_TC" 3496 4815 |
| 23 | 359895 | 360116 | + | Target "Motif:L1_TC" 3496 3723 |
| 23 | 366053 | 367329 | + | Target "Motif:L1_TC" 3496 4815 |
| 23 | 371685 | 372786 | + | Target "Motif:L1_TC" 3690 4815 |
| 23 | 383508 | 384820 | + | Target "Motif:L1_TC" 3496 4819 |
| 24 | 20026  | 24716  | + | Target "Motif:L1_TC" 1 4815    |
| 24 | 157886 | 162585 | + | Target "Motif:L1_TC" 1 4815    |
| 24 | 157886 | 162585 | + | Target "Motif:L1_TC" 1 4815    |
| 24 | 344874 | 349561 | - | Target "Motif:L1_TC" 1 4817    |
| 24 | 432306 | 436926 | + | Target "Motif:L1_TC" 2 4815    |
| 24 | 475130 | 479820 | - | Target "Motif:L1_TC" 1 4816    |
| 24 | 539792 | 542922 | - | Target "Motif:L1_TC" 1669 4823 |
| 24 | 539792 | 542922 | - | Target "Motif:L1_TC" 1669 4823 |
| 24 | 539792 | 542922 | - | Target "Motif:L1_TC" 1669 4823 |
| 24 | 545992 | 548372 | - | Target "Motif:L1_TC" 1 2320    |
| 24 | 548384 | 553263 | - | Target "Motif:L1_TC" 1 4831    |
| 24 | 548384 | 553263 | - | Target "Motif:L1_TC" 1 4831    |
| 24 | 548384 | 553263 | - | Target "Motif:L1_TC" 1 4831    |
| 24 | 559615 | 562730 | - | Target "Motif:L1_TC" 1669 4825 |
| 24 | 559615 | 562730 | - | Target "Motif:L1_TC" 1669 4825 |
| 24 | 563518 | 568384 | - | Target "Motif:L1_TC" 1 4822    |
| 24 | 568391 | 573275 | - | Target "Motif:L1_TC" 1 4828    |
| 24 | 575449 | 578601 | - | Target "Motif:L1_TC" 1663 4831 |

|    |        |        |   |                                |
|----|--------|--------|---|--------------------------------|
| 24 | 578592 | 579531 | - | Target "Motif:L1_TC" 1 947     |
| 24 | 585884 | 590680 | - | Target "Motif:L1_TC" 16 4829   |
| 24 | 585884 | 590680 | - | Target "Motif:L1_TC" 16 4829   |
| 24 | 585884 | 590680 | - | Target "Motif:L1_TC" 16 4829   |
| 24 | 590741 | 590958 | - | Target "Motif:L1_TC" 1 218     |
| 24 | 590968 | 594115 | - | Target "Motif:L1_TC" 1669 4831 |
| 24 | 597379 | 600795 | - | Target "Motif:L1_TC" 1391 4825 |
| 24 | 601217 | 602549 | - | Target "Motif:L1_TC" 48 1396   |
| 24 | 601217 | 602549 | - | Target "Motif:L1_TC" 48 1396   |
| 26 | 534115 | 534333 | - | Target "Motif:L1_TC" 1 219     |
| 27 | 68138  | 68373  | - | Target "Motif:L1_TC" 1 240     |
| 27 | 174006 | 174410 | - | Target "Motif:L1_TC" 4417 4826 |
| 27 | 197593 | 200718 | - | Target "Motif:L1_TC" 1669 4824 |
| 27 | 205979 | 206386 | - | Target "Motif:L1_TC" 4417 4826 |
| 27 | 491421 | 496192 | - | Target "Motif:L1_TC" 1 4822    |
| 28 | 415941 | 420764 | - | Target "Motif:L1_TC" 1 4831    |
| 28 | 415941 | 420764 | - | Target "Motif:L1_TC" 1 4831    |
| 29 | 8199   | 8413   | - | Target "Motif:L1_TC" 1 213     |
| 29 | 31195  | 31409  | - | Target "Motif:L1_TC" 1 213     |
| 29 | 308681 | 309493 | - | Target "Motif:L1_TC" 3994 4807 |
| 29 | 309489 | 314204 | + | Target "Motif:L1_TC" 1 4807    |
| 29 | 309489 | 314204 | + | Target "Motif:L1_TC" 1 4807    |
| 3  | 178515 | 178738 | + | Target "Motif:L1_TC" 1 219     |
| 3  | 657157 | 661683 | + | Target "Motif:L1_TC" 114 4824  |
| 3  | 657157 | 661683 | + | Target "Motif:L1_TC" 114 4824  |
| 3  | 699983 | 701465 | + | Target "Motif:L1_TC" 114 1620  |
| 3  | 701412 | 704448 | + | Target "Motif:L1_TC" 1697 4824 |
| 3  | 701412 | 704448 | + | Target "Motif:L1_TC" 1697 4824 |
| 3  | 705361 | 707811 | + | Target "Motif:L1_TC" 2393 4826 |
| 3  | 707807 | 707893 | + | Target "Motif:L1_TC" 160 248   |
| 3  | 707819 | 712682 | + | Target "Motif:L1_TC" 1 4826    |
| 3  | 707819 | 712682 | + | Target "Motif:L1_TC" 1 4826    |
| 3  | 712669 | 717511 | + | Target "Motif:L1_TC" 1 4829    |
| 3  | 712669 | 717511 | + | Target "Motif:L1_TC" 1 4829    |
| 3  | 717520 | 722390 | + | Target "Motif:L1_TC" 1 4830    |
| 3  | 717520 | 722390 | + | Target "Motif:L1_TC" 1 4830    |
| 3  | 717520 | 722390 | + | Target "Motif:L1_TC" 1 4830    |
| 3  | 722400 | 727248 | + | Target "Motif:L1_TC" 1 4822    |
| 3  | 731459 | 736325 | + | Target "Motif:L1_TC" 1 4828    |
| 3  | 731459 | 736325 | + | Target "Motif:L1_TC" 1 4828    |
| 3  | 736335 | 741210 | + | Target "Motif:L1_TC" 1 4823    |
| 3  | 746542 | 746760 | + | Target "Motif:L1_TC" 1 218     |
| 3  | 748991 | 750767 | + | Target "Motif:L1_TC" 1 1783    |

|   |        |        |   |                                |
|---|--------|--------|---|--------------------------------|
| 3 | 750616 | 753857 | + | Target "Motif:L1_TC" 1571 4826 |
| 3 | 750616 | 753857 | + | Target "Motif:L1_TC" 1571 4826 |
| 3 | 753865 | 754280 | + | Target "Motif:L1_TC" 1 418     |
| 3 | 755632 | 757341 | + | Target "Motif:L1_TC" 3105 4830 |
| 3 | 763614 | 768449 | + | Target "Motif:L1_TC" 1 4826    |
| 3 | 768459 | 769390 | + | Target "Motif:L1_TC" 1 943     |
| 3 | 769694 | 772683 | + | Target "Motif:L1_TC" 1669 4700 |
| 3 | 772684 | 777567 | + | Target "Motif:L1_TC" 1 4831    |
| 3 | 772684 | 777567 | + | Target "Motif:L1_TC" 1 4831    |
| 3 | 777579 | 777799 | + | Target "Motif:L1_TC" 1 218     |
| 3 | 777862 | 782752 | + | Target "Motif:L1_TC" 1 4831    |
| 3 | 777862 | 782752 | + | Target "Motif:L1_TC" 1 4831    |
| 3 | 777862 | 782752 | + | Target "Motif:L1_TC" 1 4831    |
| 3 | 784932 | 789360 | + | Target "Motif:L1_TC" 1 4382    |
| 3 | 790689 | 795521 | + | Target "Motif:L1_TC" 1 4827    |
| 3 | 795529 | 799265 | + | Target "Motif:L1_TC" 1 3679    |
| 3 | 803751 | 808488 | + | Target "Motif:L1_TC" 124 4821  |
| 3 | 814686 | 819554 | + | Target "Motif:L1_TC" 1 4831    |
| 3 | 821682 | 823303 | + | Target "Motif:L1_TC" 1 1615    |
| 3 | 828568 | 833323 | + | Target "Motif:L1_TC" 124 4827  |
| 3 | 828568 | 833323 | + | Target "Motif:L1_TC" 124 4827  |
| 3 | 828568 | 833323 | + | Target "Motif:L1_TC" 124 4827  |
| 3 | 843872 | 845498 | + | Target "Motif:L1_TC" 1 1639    |
| 3 | 843872 | 845498 | + | Target "Motif:L1_TC" 1 1639    |
| 3 | 845475 | 849354 | + | Target "Motif:L1_TC" 988 4828  |
| 3 | 845475 | 849354 | + | Target "Motif:L1_TC" 988 4828  |
| 3 | 853553 | 858438 | + | Target "Motif:L1_TC" 1 4830    |
| 3 | 853553 | 858438 | + | Target "Motif:L1_TC" 1 4830    |
| 3 | 853553 | 858438 | + | Target "Motif:L1_TC" 1 4830    |
| 3 | 853553 | 858438 | + | Target "Motif:L1_TC" 1 4830    |
| 3 | 860615 | 865052 | + | Target "Motif:L1_TC" 1 4382    |
| 3 | 860615 | 865052 | + | Target "Motif:L1_TC" 1 4382    |
| 3 | 872316 | 877200 | + | Target "Motif:L1_TC" 1 4831    |
| 3 | 872316 | 877200 | + | Target "Motif:L1_TC" 1 4831    |
| 3 | 877213 | 877433 | + | Target "Motif:L1_TC" 1 218     |
| 3 | 879658 | 879877 | + | Target "Motif:L1_TC" 1 218     |
| 3 | 880761 | 882870 | + | Target "Motif:L1_TC" 2710 4829 |
| 3 | 882880 | 887769 | + | Target "Motif:L1_TC" 1 4827    |
| 3 | 882880 | 887769 | + | Target "Motif:L1_TC" 1 4827    |
| 3 | 882880 | 887769 | + | Target "Motif:L1_TC" 1 4827    |
| 3 | 882880 | 887769 | + | Target "Motif:L1_TC" 1 4827    |
| 3 | 887756 | 887852 | + | Target "Motif:L1_TC" 160 248   |
| 3 | 887777 | 892659 | + | Target "Motif:L1_TC" 1 4829    |



|    |         |         |   |                                |
|----|---------|---------|---|--------------------------------|
| 3  | 887777  | 892659  | + | Target "Motif:L1_TC" 1 4829    |
| 3  | 887777  | 892659  | + | Target "Motif:L1_TC" 1 4829    |
| 3  | 887777  | 892659  | + | Target "Motif:L1_TC" 1 4829    |
| 3  | 892669  | 892889  | + | Target "Motif:L1_TC" 1 218     |
| 3  | 892950  | 897819  | + | Target "Motif:L1_TC" 1 4831    |
| 3  | 892950  | 897819  | + | Target "Motif:L1_TC" 1 4831    |
| 3  | 892950  | 897819  | + | Target "Motif:L1_TC" 1 4831    |
| 3  | 892950  | 897819  | + | Target "Motif:L1_TC" 1 4831    |
| 3  | 897815  | 898047  | + | Target "Motif:L1_TC" 1 245     |
| 3  | 898107  | 902978  | + | Target "Motif:L1_TC" 1 4831    |
| 3  | 898107  | 902978  | + | Target "Motif:L1_TC" 1 4831    |
| 3  | 905143  | 907928  | + | Target "Motif:L1_TC" 1 2739    |
| 3  | 914728  | 919560  | + | Target "Motif:L1_TC" 1 4831    |
| 3  | 914728  | 919560  | + | Target "Motif:L1_TC" 1 4831    |
| 3  | 921724  | 922024  | + | Target "Motif:L1_TC" 1 300     |
| 3  | 927498  | 931990  | + | Target "Motif:L1_TC" 1 4458    |
| 3  | 934022  | 934265  | + | Target "Motif:L1_TC" 4584 4827 |
| 3  | 936258  | 941062  | + | Target "Motif:L1_TC" 1 4798    |
| 3  | 942995  | 946305  | + | Target "Motif:L1_TC" 1436 4828 |
| 3  | 942995  | 946305  | + | Target "Motif:L1_TC" 1436 4828 |
| 3  | 946313  | 951195  | + | Target "Motif:L1_TC" 1 4831    |
| 3  | 951204  | 951401  | + | Target "Motif:L1_TC" 1 198     |
| 3  | 951460  | 956268  | + | Target "Motif:L1_TC" 1 4819    |
| 3  | 951460  | 956268  | + | Target "Motif:L1_TC" 1 4819    |
| 3  | 1103263 | 1103350 | - | Target "Motif:L1_TC" 2080 2166 |
| 3  | 1103488 | 1104384 | + | Target "Motif:L1_TC" 1201 2166 |
| 3  | 1155528 | 1155624 | + | Target "Motif:L1_TC" 11 220    |
| 3  | 1155620 | 1155663 | + | Target "Motif:L1_TC" 4777 4819 |
| 31 | 157083  | 159605  | + | Target "Motif:L1_TC" 1 2544    |
| 31 | 157083  | 159605  | + | Target "Motif:L1_TC" 1 2544    |
| 31 | 460365  | 464350  | + | Target "Motif:L1_TC" 750 4818  |
| 31 | 460365  | 464350  | + | Target "Motif:L1_TC" 750 4818  |
| 32 | 14394   | 19058   | + | Target "Motif:L1_TC" 31 4825   |
| 32 | 25558   | 25663   | + | Target "Motif:L1_TC" 3641 3745 |
| 32 | 653743  | 658337  | + | Target "Motif:L1_TC" 106 4816  |
| 32 | 653743  | 658337  | + | Target "Motif:L1_TC" 106 4816  |
| 32 | 653743  | 658337  | + | Target "Motif:L1_TC" 106 4816  |
| 32 | 660473  | 665083  | + | Target "Motif:L1_TC" 106 4816  |
| 32 | 660473  | 665083  | + | Target "Motif:L1_TC" 106 4816  |
| 32 | 816289  | 816507  | + | Target "Motif:L1_TC" 1 218     |
| 32 | 977807  | 982522  | + | Target "Motif:L1_TC" 1 4820    |
| 32 | 995399  | 996578  | - | Target "Motif:L1_TC" 3641 4825 |
| 33 | 25832   | 30453   | + | Target "Motif:L1_TC" 1 4821    |

|    |        |        |   |                                |
|----|--------|--------|---|--------------------------------|
| 33 | 25832  | 30453  | + | Target "Motif:L1_TC" 1 4821    |
| 33 | 50759  | 55379  | + | Target "Motif:L1_TC" 1 4821    |
| 33 | 67969  | 72615  | + | Target "Motif:L1_TC" 1 4820    |
| 33 | 67969  | 72615  | + | Target "Motif:L1_TC" 1 4820    |
| 33 | 67969  | 72615  | + | Target "Motif:L1_TC" 1 4820    |
| 33 | 127272 | 131973 | + | Target "Motif:L1_TC" 1 4821    |
| 35 | 8413   | 9719   | - | Target "Motif:L1_TC" 3496 4827 |
| 35 | 8413   | 9719   | - | Target "Motif:L1_TC" 3496 4827 |
| 35 | 16162  | 17467  | - | Target "Motif:L1_TC" 3496 4826 |
| 35 | 16162  | 17467  | - | Target "Motif:L1_TC" 3496 4826 |
| 35 | 38856  | 40175  | - | Target "Motif:L1_TC" 3481 4815 |
| 35 | 69093  | 70657  | + | Target "Motif:L1_TC" 1 1600    |
| 35 | 70669  | 73667  | + | Target "Motif:L1_TC" 1697 4822 |
| 35 | 88678  | 90266  | + | Target "Motif:L1_TC" 1 1620    |
| 35 | 90215  | 93299  | + | Target "Motif:L1_TC" 1697 4824 |
| 35 | 99531  | 102712 | + | Target "Motif:L1_TC" 1595 4826 |
| 35 | 102723 | 107521 | + | Target "Motif:L1_TC" 1 4826    |
| 35 | 107530 | 108552 | + | Target "Motif:L1_TC" 1 1040    |
| 35 | 114144 | 118974 | + | Target "Motif:L1_TC" 1 4824    |
| 35 | 114144 | 118974 | + | Target "Motif:L1_TC" 1 4824    |
| 35 | 118970 | 121335 | + | Target "Motif:L1_TC" 1 2320    |
| 35 | 131569 | 136445 | + | Target "Motif:L1_TC" 1 4823    |
| 35 | 136456 | 141188 | + | Target "Motif:L1_TC" 1 4822    |
| 35 | 136456 | 141188 | + | Target "Motif:L1_TC" 1 4822    |
| 35 | 141199 | 142804 | + | Target "Motif:L1_TC" 1 1615    |
| 35 | 144170 | 149019 | + | Target "Motif:L1_TC" 1 4817    |
| 35 | 144170 | 149019 | + | Target "Motif:L1_TC" 1 4817    |
| 35 | 162718 | 167507 | + | Target "Motif:L1_TC" 1 4828    |
| 35 | 162718 | 167507 | + | Target "Motif:L1_TC" 1 4828    |
| 35 | 162718 | 167507 | + | Target "Motif:L1_TC" 1 4828    |
| 35 | 162718 | 167507 | + | Target "Motif:L1_TC" 1 4828    |
| 35 | 382772 | 382991 | + | Target "Motif:L1_TC" 1 217     |
| 35 | 391465 | 391684 | + | Target "Motif:L1_TC" 1 217     |
| 35 | 400792 | 401010 | - | Target "Motif:L1_TC" 1 217     |
| 35 | 506863 | 507081 | + | Target "Motif:L1_TC" 1 217     |
| 35 | 516197 | 516416 | - | Target "Motif:L1_TC" 1 217     |
| 36 | 418078 | 418297 | + | Target "Motif:L1_TC" 1 218     |
| 37 | 263280 | 263394 | - | Target "Motif:L1_TC" 1 222     |
| 37 | 263390 | 268286 | - | Target "Motif:L1_TC" 1 4825    |
| 37 | 263390 | 268286 | - | Target "Motif:L1_TC" 1 4825    |
| 37 | 281868 | 282116 | + | Target "Motif:L1_TC" 1 218     |
| 38 | 425223 | 429523 | - | Target "Motif:L1_TC" 2 4423    |
| 38 | 425223 | 429523 | - | Target "Motif:L1_TC" 2 4423    |

|    |         |         |   |                                |
|----|---------|---------|---|--------------------------------|
| 39 | 144858  | 146208  | - | Target "Motif:L1_TC" 3449 4807 |
| 4  | 4137    | 8861    | - | Target "Motif:L1_TC" 1 4815    |
| 4  | 730937  | 735710  | - | Target "Motif:L1_TC" 1 4814    |
| 4  | 730937  | 735710  | - | Target "Motif:L1_TC" 1 4814    |
| 4  | 743208  | 747909  | - | Target "Motif:L1_TC" 1 4815    |
| 4  | 743208  | 747909  | - | Target "Motif:L1_TC" 1 4815    |
| 4  | 753057  | 757766  | + | Target "Motif:L1_TC" 1 4815    |
| 4  | 1009010 | 1009951 | - | Target "Motif:L1_TC" 1 943     |
| 4  | 1455404 | 1460270 | + | Target "Motif:L1_TC" 3 4819    |
| 4  | 1455404 | 1460270 | + | Target "Motif:L1_TC" 3 4819    |
| 4  | 1455404 | 1460270 | + | Target "Motif:L1_TC" 3 4819    |
| 40 | 80662   | 85338   | - | Target "Motif:L1_TC" 99 4821   |
| 40 | 281569  | 283046  | + | Target "Motif:L1_TC" 99 1612   |
| 40 | 311101  | 315389  | - | Target "Motif:L1_TC" 455 4820  |
| 40 | 311101  | 315389  | - | Target "Motif:L1_TC" 455 4820  |
| 40 | 337493  | 342193  | + | Target "Motif:L1_TC" 86 4821   |
| 40 | 337493  | 342193  | + | Target "Motif:L1_TC" 86 4821   |
| 40 | 337493  | 342193  | + | Target "Motif:L1_TC" 86 4821   |
| 41 | 414408  | 414614  | - | Target "Motif:L1_TC" 1 213     |
| 42 | 6478    | 10991   | + | Target "Motif:L1_TC" 114 4824  |
| 42 | 6478    | 10991   | + | Target "Motif:L1_TC" 114 4824  |
| 42 | 16648   | 19758   | + | Target "Motif:L1_TC" 1667 4824 |
| 42 | 43703   | 48325   | - | Target "Motif:L1_TC" 1 4822    |
| 42 | 55733   | 58770   | - | Target "Motif:L1_TC" 1727 4798 |
| 42 | 58744   | 60316   | - | Target "Motif:L1_TC" 1 1620    |
| 42 | 67640   | 71961   | - | Target "Motif:L1_TC" 1 4382    |
| 42 | 67640   | 71961   | - | Target "Motif:L1_TC" 1 4382    |
| 42 | 76734   | 80957   | - | Target "Motif:L1_TC" 1 4423    |
| 42 | 76734   | 80957   | - | Target "Motif:L1_TC" 1 4423    |
| 42 | 76734   | 80957   | - | Target "Motif:L1_TC" 1 4423    |
| 42 | 161677  | 164881  | - | Target "Motif:L1_TC" 1588 4829 |
| 42 | 161677  | 164881  | - | Target "Motif:L1_TC" 1588 4829 |
| 42 | 199328  | 203354  | - | Target "Motif:L1_TC" 750 4817  |
| 42 | 199328  | 203354  | - | Target "Motif:L1_TC" 750 4817  |
| 42 | 199328  | 203354  | - | Target "Motif:L1_TC" 750 4817  |
| 42 | 438675  | 438895  | - | Target "Motif:L1_TC" 1 218     |
| 42 | 438906  | 443751  | - | Target "Motif:L1_TC" 4 4821    |
| 42 | 438906  | 443751  | - | Target "Motif:L1_TC" 4 4821    |
| 42 | 438906  | 443751  | - | Target "Motif:L1_TC" 4 4821    |
| 42 | 507107  | 507326  | + | Target "Motif:L1_TC" 1 218     |
| 42 | 621965  | 622189  | + | Target "Motif:L1_TC" 1 248     |
| 42 | 669976  | 674302  | - | Target "Motif:L1_TC" 4 4382    |
| 42 | 687634  | 687871  | + | Target "Motif:L1_TC" 1 248     |

|    |         |         |   |                                |
|----|---------|---------|---|--------------------------------|
| 42 | 802585  | 807313  | - | Target "Motif:L1_TC" 124 4827  |
| 42 | 802585  | 807313  | - | Target "Motif:L1_TC" 124 4827  |
| 42 | 845069  | 849811  | - | Target "Motif:L1_TC" 124 4820  |
| 42 | 845069  | 849811  | - | Target "Motif:L1_TC" 124 4820  |
| 43 | 112683  | 113863  | + | Target "Motif:L1_TC" 3641 4826 |
| 44 | 11191   | 15937   | - | Target "Motif:L1_TC" 1 4828    |
| 44 | 11191   | 15937   | - | Target "Motif:L1_TC" 1 4828    |
| 44 | 148976  | 153709  | - | Target "Motif:L1_TC" 1 4817    |
| 45 | 19546   | 19765   | + | Target "Motif:L1_TC" 1 219     |
| 45 | 153434  | 156678  | - | Target "Motif:L1_TC" 1571 4831 |
| 45 | 153434  | 156678  | - | Target "Motif:L1_TC" 1571 4831 |
| 45 | 156533  | 158284  | - | Target "Motif:L1_TC" 7 1783    |
| 45 | 158294  | 159226  | - | Target "Motif:L1_TC" 1 943     |
| 45 | 271369  | 276166  | - | Target "Motif:L1_TC" 1 4819    |
| 45 | 271369  | 276166  | - | Target "Motif:L1_TC" 1 4819    |
| 45 | 271369  | 276166  | - | Target "Motif:L1_TC" 1 4819    |
| 45 | 297245  | 302117  | + | Target "Motif:L1_TC" 1 4831    |
| 45 | 297245  | 302117  | + | Target "Motif:L1_TC" 1 4831    |
| 45 | 297245  | 302117  | + | Target "Motif:L1_TC" 1 4831    |
| 45 | 349813  | 353137  | - | Target "Motif:L1_TC" 1336 4825 |
| 45 | 365055  | 368379  | - | Target "Motif:L1_TC" 1336 4826 |
| 45 | 375940  | 379252  | - | Target "Motif:L1_TC" 1336 4825 |
| 45 | 383954  | 387291  | - | Target "Motif:L1_TC" 1336 4824 |
| 45 | 394895  | 398227  | - | Target "Motif:L1_TC" 1336 4825 |
| 45 | 410871  | 414172  | - | Target "Motif:L1_TC" 1336 4824 |
| 45 | 421768  | 424851  | - | Target "Motif:L1_TC" 1578 4825 |
| 46 | 28735   | 30045   | + | Target "Motif:L1_TC" 3496 4824 |
| 46 | 127592  | 128899  | - | Target "Motif:L1_TC" 3496 4822 |
| 46 | 127592  | 128899  | - | Target "Motif:L1_TC" 3496 4822 |
| 46 | 127592  | 128899  | - | Target "Motif:L1_TC" 3496 4822 |
| 46 | 127592  | 128899  | - | Target "Motif:L1_TC" 3496 4822 |
| 46 | 138808  | 140122  | - | Target "Motif:L1_TC" 3496 4824 |
| 46 | 220721  | 224096  | + | Target "Motif:L1_TC" 1257 4778 |
| 46 | 220721  | 224096  | + | Target "Motif:L1_TC" 1257 4778 |
| 46 | 220721  | 224096  | + | Target "Motif:L1_TC" 1257 4778 |
| 46 | 252644  | 252734  | - | Target "Motif:L1_TC" 1 89      |
| 46 | 286382  | 289065  | + | Target "Motif:L1_TC" 2140 4831 |
| 5  | 516602  | 517784  | + | Target "Motif:L1_TC" 3641 4825 |
| 5  | 744146  | 744368  | + | Target "Motif:L1_TC" 1 218     |
| 5  | 757517  | 762228  | - | Target "Motif:L1_TC" 2 4823    |
| 5  | 819290  | 822289  | - | Target "Motif:L1_TC" 2 3103    |
| 5  | 1088172 | 1088434 | - | Target "Motif:L1_TC" 1 248     |
| 5  | 1166995 | 1167061 | + | Target "Motif:L1_TC" 1 67      |

|   |         |         |   |                                |
|---|---------|---------|---|--------------------------------|
| 5 | 1228055 | 1232516 | + | Target "Motif:L1_TC" 1 4423    |
| 5 | 1228055 | 1232516 | + | Target "Motif:L1_TC" 1 4423    |
| 5 | 1228055 | 1232516 | + | Target "Motif:L1_TC" 1 4423    |
| 5 | 1228055 | 1232516 | + | Target "Motif:L1_TC" 1 4423    |
| 5 | 1245678 | 1250436 | + | Target "Motif:L1_TC" 124 4828  |
| 5 | 1245678 | 1250436 | + | Target "Motif:L1_TC" 124 4828  |
| 5 | 1262693 | 1267586 | + | Target "Motif:L1_TC" 1 4831    |
| 5 | 1273810 | 1278688 | + | Target "Motif:L1_TC" 1 4827    |
| 5 | 1273810 | 1278688 | + | Target "Motif:L1_TC" 1 4827    |
| 5 | 1273810 | 1278688 | + | Target "Motif:L1_TC" 1 4827    |
| 5 | 1273810 | 1278688 | + | Target "Motif:L1_TC" 1 4827    |
| 5 | 1294438 | 1299328 | + | Target "Motif:L1_TC" 1 4830    |
| 5 | 1294438 | 1299328 | + | Target "Motif:L1_TC" 1 4830    |
| 5 | 1303828 | 1305419 | + | Target "Motif:L1_TC" 3234 4830 |
| 5 | 1305429 | 1310319 | + | Target "Motif:L1_TC" 1 4831    |
| 5 | 1314508 | 1317307 | + | Target "Motif:L1_TC" 1 2739    |
| 5 | 1314508 | 1317307 | + | Target "Motif:L1_TC" 1 2739    |
| 5 | 1322854 | 1327733 | + | Target "Motif:L1_TC" 1 4829    |
| 5 | 1331913 | 1336795 | + | Target "Motif:L1_TC" 1 4830    |
| 5 | 1331913 | 1336795 | + | Target "Motif:L1_TC" 1 4830    |
| 5 | 1338968 | 1339318 | + | Target "Motif:L1_TC" 1 350     |
| 5 | 1339373 | 1339427 | + | Target "Motif:L1_TC" 4778 4831 |
| 5 | 1339437 | 1344313 | + | Target "Motif:L1_TC" 1 4828    |
| 5 | 1339437 | 1344313 | + | Target "Motif:L1_TC" 1 4828    |
| 5 | 1339437 | 1344313 | + | Target "Motif:L1_TC" 1 4828    |
| 5 | 1344323 | 1349210 | + | Target "Motif:L1_TC" 1 4827    |
| 5 | 1344323 | 1349210 | + | Target "Motif:L1_TC" 1 4827    |
| 5 | 1344323 | 1349210 | + | Target "Motif:L1_TC" 1 4827    |
| 5 | 1349220 | 1354076 | + | Target "Motif:L1_TC" 1 4818    |
| 5 | 1349220 | 1354076 | + | Target "Motif:L1_TC" 1 4818    |
| 5 | 1356612 | 1361063 | + | Target "Motif:L1_TC" 416 4826  |
| 5 | 1356612 | 1361063 | + | Target "Motif:L1_TC" 416 4826  |
| 5 | 1361074 | 1365932 | + | Target "Motif:L1_TC" 1 4829    |
| 5 | 1361074 | 1365932 | + | Target "Motif:L1_TC" 1 4829    |
| 5 | 1365941 | 1370790 | + | Target "Motif:L1_TC" 1 4819    |
| 5 | 1365941 | 1370790 | + | Target "Motif:L1_TC" 1 4819    |
| 6 | 272638  | 273936  | + | Target "Motif:L1_TC" 3483 4815 |
| 6 | 284112  | 288737  | + | Target "Motif:L1_TC" 1 4814    |
| 6 | 284112  | 288737  | + | Target "Motif:L1_TC" 1 4814    |
| 6 | 284112  | 288737  | + | Target "Motif:L1_TC" 1 4814    |
| 6 | 328919  | 329194  | - | Target "Motif:L1_TC" 4546 4820 |
| 6 | 329186  | 329551  | - | Target "Motif:L1_TC" 3655 4049 |
| 6 | 334292  | 334565  | - | Target "Motif:L1_TC" 4546 4819 |

|   |         |         |   |                                |
|---|---------|---------|---|--------------------------------|
| 6 | 334557  | 338202  | - | Target "Motif:L1_TC" 180 4049  |
| 6 | 364132  | 364406  | - | Target "Motif:L1_TC" 4546 4820 |
| 6 | 364398  | 368049  | - | Target "Motif:L1_TC" 165 4049  |
| 6 | 516034  | 516162  | - | Target "Motif:L1_TC" 3305 3432 |
| 6 | 893796  | 898559  | - | Target "Motif:L1_TC" 1 4815    |
| 6 | 903701  | 908474  | + | Target "Motif:L1_TC" 1 4816    |
| 6 | 1171616 | 1174087 | + | Target "Motif:L1_TC" 2340 4831 |
| 7 | 13044   | 13108   | - | Target "Motif:L1_TC" 4 67      |
| 7 | 627403  | 631188  | - | Target "Motif:L1_TC" 945 4822  |
| 7 | 627403  | 631188  | - | Target "Motif:L1_TC" 945 4822  |
| 7 | 631409  | 635133  | - | Target "Motif:L1_TC" 1 3679    |
| 7 | 635141  | 640028  | - | Target "Motif:L1_TC" 1 4829    |
| 7 | 635141  | 640028  | - | Target "Motif:L1_TC" 1 4829    |
| 7 | 640037  | 644938  | - | Target "Motif:L1_TC" 1 4828    |
| 7 | 640037  | 644938  | - | Target "Motif:L1_TC" 1 4828    |
| 7 | 640037  | 644938  | - | Target "Motif:L1_TC" 1 4828    |
| 7 | 644925  | 648058  | - | Target "Motif:L1_TC" 1669 4829 |
| 7 | 650107  | 653273  | - | Target "Motif:L1_TC" 1 3103    |
| 7 | 650107  | 653273  | - | Target "Motif:L1_TC" 1 3103    |
| 7 | 653282  | 658167  | - | Target "Motif:L1_TC" 1 4830    |
| 7 | 653282  | 658167  | - | Target "Motif:L1_TC" 1 4830    |
| 7 | 658177  | 661420  | - | Target "Motif:L1_TC" 1585 4829 |
| 7 | 658177  | 661420  | - | Target "Motif:L1_TC" 1585 4829 |
| 7 | 661284  | 663059  | - | Target "Motif:L1_TC" 1 1783    |
| 7 | 663069  | 664644  | - | Target "Motif:L1_TC" 3234 4828 |
| 7 | 667546  | 668500  | - | Target "Motif:L1_TC" 1 961     |
| 7 | 674700  | 679581  | - | Target "Motif:L1_TC" 1 4831    |
| 7 | 674700  | 679581  | - | Target "Motif:L1_TC" 1 4831    |
| 7 | 681754  | 683873  | - | Target "Motif:L1_TC" 2700 4831 |
| 7 | 685220  | 689649  | - | Target "Motif:L1_TC" 1 4382    |
| 7 | 685220  | 689649  | - | Target "Motif:L1_TC" 1 4382    |
| 7 | 689658  | 694534  | - | Target "Motif:L1_TC" 1 4830    |
| 7 | 689658  | 694534  | - | Target "Motif:L1_TC" 1 4830    |
| 7 | 689658  | 694534  | - | Target "Motif:L1_TC" 1 4830    |
| 7 | 694544  | 699410  | - | Target "Motif:L1_TC" 1 4830    |
| 7 | 694544  | 699410  | - | Target "Motif:L1_TC" 1 4830    |
| 7 | 699419  | 704261  | - | Target "Motif:L1_TC" 1 4829    |
| 7 | 704248  | 708959  | - | Target "Motif:L1_TC" 1 4829    |
| 7 | 715320  | 720206  | - | Target "Motif:L1_TC" 1 4829    |
| 7 | 722212  | 725447  | - | Target "Motif:L1_TC" 1571 4831 |
| 7 | 725297  | 727061  | - | Target "Motif:L1_TC" 1 1783    |
| 7 | 727069  | 728200  | - | Target "Motif:L1_TC" 3681 4831 |
| 7 | 728782  | 729197  | - | Target "Motif:L1_TC" 1 418     |

|   |        |        |   |                                |
|---|--------|--------|---|--------------------------------|
| 7 | 731216 | 736097 | - | Target "Motif:L1_TC" 1 4830    |
| 7 | 731216 | 736097 | - | Target "Motif:L1_TC" 1 4830    |
| 7 | 731216 | 736097 | - | Target "Motif:L1_TC" 1 4830    |
| 7 | 736108 | 740985 | - | Target "Motif:L1_TC" 1 4830    |
| 7 | 744076 | 748523 | - | Target "Motif:L1_TC" 1 4392    |
| 7 | 744076 | 748523 | - | Target "Motif:L1_TC" 1 4392    |
| 7 | 748534 | 753434 | - | Target "Motif:L1_TC" 1 4828    |
| 7 | 748534 | 753434 | - | Target "Motif:L1_TC" 1 4828    |
| 7 | 748534 | 753434 | - | Target "Motif:L1_TC" 1 4828    |
| 7 | 753421 | 757212 | - | Target "Motif:L1_TC" 1083 4828 |
| 7 | 753421 | 757212 | - | Target "Motif:L1_TC" 1083 4828 |
| 7 | 758896 | 761697 | - | Target "Motif:L1_TC" 1 2739    |
| 7 | 761706 | 766586 | - | Target "Motif:L1_TC" 1 4829    |
| 7 | 761706 | 766586 | - | Target "Motif:L1_TC" 1 4829    |
| 7 | 761706 | 766586 | - | Target "Motif:L1_TC" 1 4829    |
| 7 | 768763 | 772530 | - | Target "Motif:L1_TC" 990 4831  |
| 7 | 768763 | 772530 | - | Target "Motif:L1_TC" 990 4831  |
| 7 | 768763 | 772530 | - | Target "Motif:L1_TC" 990 4831  |
| 7 | 774121 | 778996 | - | Target "Motif:L1_TC" 1 4825    |
| 7 | 774121 | 778996 | - | Target "Motif:L1_TC" 1 4825    |
| 7 | 779004 | 783883 | - | Target "Motif:L1_TC" 1 4828    |
| 7 | 786103 | 786319 | - | Target "Motif:L1_TC" 1 218     |
| 7 | 793429 | 795029 | - | Target "Motif:L1_TC" 1 1615    |
| 7 | 793429 | 795029 | - | Target "Motif:L1_TC" 1 1615    |
| 7 | 797269 | 797489 | - | Target "Motif:L1_TC" 1 218     |
| 7 | 801724 | 801939 | - | Target "Motif:L1_TC" 1 218     |
| 7 | 803997 | 804217 | - | Target "Motif:L1_TC" 1 218     |
| 7 | 806436 | 806651 | - | Target "Motif:L1_TC" 2 218     |
| 7 | 806663 | 809812 | - | Target "Motif:L1_TC" 1669 4831 |
| 7 | 806663 | 809812 | - | Target "Motif:L1_TC" 1669 4831 |
| 7 | 810364 | 814809 | - | Target "Motif:L1_TC" 1 4423    |
| 7 | 810364 | 814809 | - | Target "Motif:L1_TC" 1 4423    |
| 7 | 818987 | 823437 | - | Target "Motif:L1_TC" 420 4830  |
| 7 | 818987 | 823437 | - | Target "Motif:L1_TC" 420 4830  |
| 7 | 818987 | 823437 | - | Target "Motif:L1_TC" 420 4830  |
| 7 | 824732 | 828308 | - | Target "Motif:L1_TC" 1 3662    |
| 7 | 828319 | 833038 | - | Target "Motif:L1_TC" 1 4824    |
| 7 | 828319 | 833038 | - | Target "Motif:L1_TC" 1 4824    |
| 7 | 833049 | 837783 | - | Target "Motif:L1_TC" 1 4823    |
| 7 | 833049 | 837783 | - | Target "Motif:L1_TC" 1 4823    |
| 7 | 833049 | 837783 | - | Target "Motif:L1_TC" 1 4823    |
| 7 | 837794 | 842472 | - | Target "Motif:L1_TC" 57 4823   |
| 7 | 837794 | 842472 | - | Target "Motif:L1_TC" 57 4823   |

|   |         |         |   |                                |
|---|---------|---------|---|--------------------------------|
| 7 | 837794  | 842472  | - | Target "Motif:L1_TC" 57 4823   |
| 7 | 842473  | 845976  | - | Target "Motif:L1_TC" 1 3575    |
| 7 | 842473  | 845976  | - | Target "Motif:L1_TC" 1 3575    |
| 7 | 842473  | 845976  | - | Target "Motif:L1_TC" 1 3575    |
| 7 | 845987  | 850725  | - | Target "Motif:L1_TC" 1 4823    |
| 7 | 845987  | 850725  | - | Target "Motif:L1_TC" 1 4823    |
| 7 | 850735  | 855476  | - | Target "Motif:L1_TC" 1 4823    |
| 7 | 850735  | 855476  | - | Target "Motif:L1_TC" 1 4823    |
| 7 | 850735  | 855476  | - | Target "Motif:L1_TC" 1 4823    |
| 7 | 855487  | 858504  | - | Target "Motif:L1_TC" 1768 4823 |
| 7 | 860159  | 864599  | - | Target "Motif:L1_TC" 1 4382    |
| 7 | 860159  | 864599  | - | Target "Motif:L1_TC" 1 4382    |
| 7 | 864609  | 869493  | - | Target "Motif:L1_TC" 1 4829    |
| 7 | 864609  | 869493  | - | Target "Motif:L1_TC" 1 4829    |
| 7 | 864609  | 869493  | - | Target "Motif:L1_TC" 1 4829    |
| 7 | 873195  | 874135  | - | Target "Motif:L1_TC" 1 943     |
| 7 | 876303  | 881207  | - | Target "Motif:L1_TC" 1 4827    |
| 7 | 876303  | 881207  | - | Target "Motif:L1_TC" 1 4827    |
| 7 | 881194  | 886066  | - | Target "Motif:L1_TC" 1 4826    |
| 7 | 892383  | 895535  | - | Target "Motif:L1_TC" 1 3103    |
| 7 | 892383  | 895535  | - | Target "Motif:L1_TC" 1 3103    |
| 7 | 1269168 | 1270710 | + | Target "Motif:L1_TC" 180 1881  |
| 7 | 1276252 | 1279924 | + | Target "Motif:L1_TC" 180 4049  |
| 7 | 1279916 | 1280191 | + | Target "Motif:L1_TC" 4546 4822 |
| 7 | 1285575 | 1288909 | + | Target "Motif:L1_TC" 180 3694  |
| 7 | 1290332 | 1293984 | + | Target "Motif:L1_TC" 180 4049  |
| 7 | 1293976 | 1294253 | + | Target "Motif:L1_TC" 4546 4822 |
| 7 | 1293976 | 1294253 | + | Target "Motif:L1_TC" 4546 4822 |
| 7 | 1299606 | 1303271 | + | Target "Motif:L1_TC" 180 4049  |
| 7 | 1303263 | 1303537 | + | Target "Motif:L1_TC" 4546 4821 |
| 7 | 1313033 | 1313342 | + | Target "Motif:L1_TC" 180 488   |
| 7 | 1330271 | 1333939 | + | Target "Motif:L1_TC" 180 4049  |
| 7 | 1333931 | 1334204 | + | Target "Motif:L1_TC" 4546 4822 |
| 7 | 1333931 | 1334204 | + | Target "Motif:L1_TC" 4546 4822 |
| 7 | 1333931 | 1334204 | + | Target "Motif:L1_TC" 4546 4822 |
| 7 | 1333931 | 1334204 | + | Target "Motif:L1_TC" 4546 4822 |
| 7 | 1338107 | 1338294 | + | Target "Motif:L1_TC" 4635 4821 |
| 7 | 1343659 | 1347325 | + | Target "Motif:L1_TC" 180 4049  |
| 7 | 1347317 | 1347589 | + | Target "Motif:L1_TC" 4546 4822 |
| 7 | 1347317 | 1347589 | + | Target "Motif:L1_TC" 4546 4822 |
| 7 | 1355775 | 1359370 | + | Target "Motif:L1_TC" 180 4049  |
| 7 | 1359362 | 1359636 | + | Target "Motif:L1_TC" 4546 4820 |
| 7 | 1366188 | 1366552 | + | Target "Motif:L1_TC" 3655 4049 |



|   |         |         |   |                                |
|---|---------|---------|---|--------------------------------|
| 7 | 1366544 | 1366818 | + | Target "Motif:L1_TC" 4546 4821 |
| 7 | 1373260 | 1373620 | + | Target "Motif:L1_TC" 3655 4049 |
| 7 | 1373612 | 1373886 | + | Target "Motif:L1_TC" 4546 4820 |
| 7 | 1460069 | 1464689 | + | Target "Motif:L1_TC" 1 4820    |
| 7 | 1584782 | 1589393 | - | Target "Motif:L1_TC" 1 4821    |
| 7 | 1691667 | 1696295 | + | Target "Motif:L1_TC" 1 4821    |
| 7 | 1691667 | 1696295 | + | Target "Motif:L1_TC" 1 4821    |
| 7 | 1757325 | 1761944 | + | Target "Motif:L1_TC" 1 4821    |
| 7 | 1757325 | 1761944 | + | Target "Motif:L1_TC" 1 4821    |
| 7 | 1771182 | 1772497 | - | Target "Motif:L1_TC" 3496 4824 |
| 7 | 1803016 | 1807651 | + | Target "Motif:L1_TC" 1 4820    |
| 7 | 1812464 | 1813406 | + | Target "Motif:L1_TC" 1 943     |
| 7 | 1818496 | 1823115 | + | Target "Motif:L1_TC" 1 4821    |
| 7 | 1837700 | 1842306 | + | Target "Motif:L1_TC" 1 4820    |
| 7 | 1847127 | 1851749 | + | Target "Motif:L1_TC" 1 4820    |
| 7 | 1914795 | 1918554 | + | Target "Motif:L1_TC" 990 4824  |
| 7 | 1914795 | 1918554 | + | Target "Motif:L1_TC" 990 4824  |
| 7 | 1918565 | 1923283 | + | Target "Motif:L1_TC" 1 4823    |
| 7 | 1923294 | 1928031 | + | Target "Motif:L1_TC" 1 4823    |
| 7 | 1923294 | 1928031 | + | Target "Motif:L1_TC" 1 4823    |
| 7 | 1928042 | 1932764 | + | Target "Motif:L1_TC" 1 4822    |
| 7 | 1928042 | 1932764 | + | Target "Motif:L1_TC" 1 4822    |
| 7 | 1932775 | 1935016 | + | Target "Motif:L1_TC" 1 2320    |
| 7 | 1941727 | 1945598 | + | Target "Motif:L1_TC" 924 4823  |
| 7 | 1945609 | 1950347 | + | Target "Motif:L1_TC" 1 4823    |
| 7 | 1945609 | 1950347 | + | Target "Motif:L1_TC" 1 4823    |
| 7 | 1945609 | 1950347 | + | Target "Motif:L1_TC" 1 4823    |
| 7 | 1950358 | 1955085 | + | Target "Motif:L1_TC" 1 4823    |
| 7 | 1950358 | 1955085 | + | Target "Motif:L1_TC" 1 4823    |
| 7 | 1955095 | 1959819 | + | Target "Motif:L1_TC" 1 4822    |
| 7 | 1955095 | 1959819 | + | Target "Motif:L1_TC" 1 4822    |
| 7 | 1959829 | 1962497 | + | Target "Motif:L1_TC" 1 2745    |
| 7 | 1959829 | 1962497 | + | Target "Motif:L1_TC" 1 2745    |
| 7 | 1959829 | 1962497 | + | Target "Motif:L1_TC" 1 2745    |
| 7 | 1962779 | 1963909 | + | Target "Motif:L1_TC" 3681 4824 |
| 7 | 1963896 | 1963993 | + | Target "Motif:L1_TC" 160 248   |
| 7 | 1963918 | 1968801 | + | Target "Motif:L1_TC" 1 4831    |
| 7 | 1963918 | 1968801 | + | Target "Motif:L1_TC" 1 4831    |
| 7 | 1963918 | 1968801 | + | Target "Motif:L1_TC" 1 4831    |
| 7 | 1968807 | 1973690 | + | Target "Motif:L1_TC" 1 4828    |
| 7 | 1968807 | 1973690 | + | Target "Motif:L1_TC" 1 4828    |
| 7 | 1968807 | 1973690 | + | Target "Motif:L1_TC" 1 4828    |
| 7 | 1968807 | 1973690 | + | Target "Motif:L1_TC" 1 4828    |

|   |         |         |   |                                |
|---|---------|---------|---|--------------------------------|
| 7 | 1968807 | 1973690 | + | Target "Motif:L1_TC" 1 4828    |
| 7 | 1973698 | 1977789 | + | Target "Motif:L1_TC" 1 4031    |
| 7 | 1979370 | 1979478 | + | Target "Motif:L1_TC" 420 527   |
| 7 | 1979474 | 1983576 | + | Target "Motif:L1_TC" 625 4823  |
| 7 | 1979474 | 1983576 | + | Target "Motif:L1_TC" 625 4823  |
| 7 | 1983587 | 1988329 | + | Target "Motif:L1_TC" 1 4823    |
| 7 | 1983587 | 1988329 | + | Target "Motif:L1_TC" 1 4823    |
| 7 | 1983587 | 1988329 | + | Target "Motif:L1_TC" 1 4823    |
| 7 | 1983587 | 1988329 | + | Target "Motif:L1_TC" 1 4823    |
| 7 | 1988340 | 1993082 | + | Target "Motif:L1_TC" 1 4823    |
| 7 | 1988340 | 1993082 | + | Target "Motif:L1_TC" 1 4823    |
| 7 | 1993093 | 1997833 | + | Target "Motif:L1_TC" 1 4822    |
| 7 | 1993093 | 1997833 | + | Target "Motif:L1_TC" 1 4822    |
| 7 | 1997844 | 1999664 | + | Target "Motif:L1_TC" 1 1897    |
| 7 | 2002761 | 2007648 | + | Target "Motif:L1_TC" 1 4829    |
| 7 | 2002761 | 2007648 | + | Target "Motif:L1_TC" 1 4829    |
| 7 | 2002761 | 2007648 | + | Target "Motif:L1_TC" 1 4829    |
| 7 | 2007659 | 2012538 | + | Target "Motif:L1_TC" 1 4825    |
| 7 | 2007659 | 2012538 | + | Target "Motif:L1_TC" 1 4825    |
| 7 | 2007659 | 2012538 | + | Target "Motif:L1_TC" 1 4825    |
| 7 | 2007659 | 2012538 | + | Target "Motif:L1_TC" 1 4825    |
| 7 | 2012548 | 2016888 | + | Target "Motif:L1_TC" 1 4322    |
| 7 | 2012548 | 2016888 | + | Target "Motif:L1_TC" 1 4322    |
| 7 | 2017617 | 2021375 | + | Target "Motif:L1_TC" 990 4828  |
| 7 | 2017617 | 2021375 | + | Target "Motif:L1_TC" 990 4828  |
| 7 | 2017617 | 2021375 | + | Target "Motif:L1_TC" 990 4828  |
| 7 | 2021378 | 2026219 | + | Target "Motif:L1_TC" 1 4817    |
| 7 | 2053293 | 2057974 | + | Target "Motif:L1_TC" 1 4815    |
| 7 | 2053293 | 2057974 | + | Target "Motif:L1_TC" 1 4815    |
| 7 | 2066411 | 2066630 | + | Target "Motif:L1_TC" 1 218     |
| 7 | 2068672 | 2068888 | + | Target "Motif:L1_TC" 1 218     |
| 7 | 2073330 | 2075280 | + | Target "Motif:L1_TC" 2825 4823 |
| 7 | 2075291 | 2079988 | + | Target "Motif:L1_TC" 1 4823    |
| 7 | 2075291 | 2079988 | + | Target "Motif:L1_TC" 1 4823    |
| 7 | 2079999 | 2082076 | + | Target "Motif:L1_TC" 1 2168    |
| 7 | 2084147 | 2088799 | + | Target "Motif:L1_TC" 26 4815   |
| 8 | 321774  | 322880  | + | Target "Motif:L1_TC" 3698 4820 |
| 8 | 710680  | 715364  | - | Target "Motif:L1_TC" 1 4817    |
| 8 | 710680  | 715364  | - | Target "Motif:L1_TC" 1 4817    |
| 8 | 710680  | 715364  | - | Target "Motif:L1_TC" 1 4817    |
| 8 | 789004  | 789066  | - | Target "Motif:L1_TC" 6 67      |
| 8 | 1059718 | 1064520 | - | Target "Motif:L1_TC" 1 4822    |
| 8 | 1059718 | 1064520 | - | Target "Motif:L1_TC" 1 4822    |

|   |         |         |   |                                |
|---|---------|---------|---|--------------------------------|
| 8 | 1073395 | 1078100 | - | Target "Motif:L1_TC" 1 4817    |
| 8 | 1086244 | 1090947 | - | Target "Motif:L1_TC" 1 4816    |
| 8 | 1086244 | 1090947 | - | Target "Motif:L1_TC" 1 4816    |
| 8 | 1097474 | 1098652 | - | Target "Motif:L1_TC" 1 1195    |
| 8 | 1098661 | 1103452 | - | Target "Motif:L1_TC" 1 4825    |
| 8 | 1098661 | 1103452 | - | Target "Motif:L1_TC" 1 4825    |
| 8 | 1103460 | 1107887 | - | Target "Motif:L1_TC" 374 4825  |
| 8 | 1115150 | 1115513 | + | Target "Motif:L1_TC" 3643 4006 |
| 8 | 1115557 | 1115776 | - | Target "Motif:L1_TC" 1 218     |
| 8 | 1115787 | 1120343 | - | Target "Motif:L1_TC" 154 4827  |
| 8 | 1115787 | 1120343 | - | Target "Motif:L1_TC" 154 4827  |
| 8 | 1115787 | 1120343 | - | Target "Motif:L1_TC" 154 4827  |
| 8 | 1115787 | 1120343 | - | Target "Motif:L1_TC" 154 4827  |
| 8 | 1151506 | 1151726 | + | Target "Motif:L1_TC" 1 218     |
